# Supplementary material for: Understanding Public Perceptions of the HPV Vaccination Based on Online Comments to Canadian News Articles
Source: PLoS One. 2015 Jun 8;10(6):e0129587. doi: 10.1371/journal.pone.0129587 (PMC4460033; doi:10.1371/journal.pone.0129587)
Supplement: S1 Dataset — (XLSX) [file pone.0129587.s002.xlsx]

## Sheet: HPV complete spreadsheet
Article link	Province	Article Number	Commenter Username	Likes	Dislikes	Comment # of total number of comments from this user	# of comments from this user	Comment- English version	Sentiment	Does user provide statistics or link to other literature?	Is user identify self as a healthcare worker?	Does comment contain a personal story?	Catholic?	Religious/ Promiscous?	Override?	Parent?
http://www.theguardian.pe.ca/Arts/2012-01-25/article-2873717/HPV-vaccine-recommended-for-boys/1	PEI	1	Sylvia	NA	NA	1	1	no!	Negative	No	No	No	No	No		No
	PEI	1	Ancalagon the Black	NA	NA	1	1	no!	Negative	No	No	No	No	No		No
	PEI	1	Stock Options	NA	NA	1	1	This is just to give this company more money! Who owns it and what goverment employies are invested in it? Gov contract! Not about heath at all just money!	Negative	No	No	No	No	No		No
http://www.straight.com/life/ubc-researchers-advocate-hpv-vaccine-scrutiny	BC	2	Scepticism is Sometimes Good	11	4	1	1	Lessons in Modern Economy teach us that corporate efforts to increase profits (and keep the shareholders happy) include investing large amounts to convince politicians and other government officials to make important political or legal decisions in their favour (also known as "lobbying"). Even when this has a possible negative (or unknown) impact on our health. The problem with this kind of econo…	Negative	No	No	No	No	No		No
	BC	2	Mindano Iha	8	5	1	3	Information in the package insert states that the vaccine has not been tested for carcinogenicity. Absence of evidence is not evidence of absence.In addition, there is the extremely relevant issue of “replacement”, a normal phenomenon in virology where strains which have been removed are always replaced by new ones. It is not known to anyone, even the manufacturer, whether the new virus strains a…	Negative	No	No	No	No	No		No
	BC	2	Mindano Iha	10	3	2	3	Next time a doctor, vaccine nurse, health authorities, media or other promoters suggest Gardasil, ask them to provide serious unbiased peer reviewed studies with documentation for all these hitherto unanswered questions:Whether it prevents cancer, necessity for boosters, whether it increases the risk of cancer, whether there is increased risk of cancer due to the unexpected discovery by an indepe…	Negative	No	No	No	No	No		No
	BC	2	Happy	7	11	1	1	Other things to consider: Pap smears are extremely effective at catching pre-cancerous changes in the cervix and preventing cervical cancer. Sales of Gardasil in the third quarter of 2011 totalled $445 million US. It is naive to think that pharmaceutical companies do not have incredible power over research studies, government policies, and resulting public health campaigns. http://www.pharmatimes…	Negative	Yes	No	No	No	No	1	No
	BC	2	Tiny Hope	10	7	1	1	MERCK should be enough for people to run the other way! Ever seen Dr. Maurice Hilleman's interview regarding the green monkeys? If not search U tube and you may be enlightened. Oh and don't forget vioxx!	Negative	Yes	No	No	No	No		No
	BC	2	Laurie Willberg	6	6	1	1	A recent meta-analysis performed at UBC completely discounts the Gardasil vaccine http://www.ncbi.nlm.nih.gov/pubmed/23016780 reveals data misrepresentation by the manufacturer and unproven/unfounded claims. The public needs unbiased, independent evaluation of pharma products from independent labs.	Negative	Yes	No	No	No	No		No
http://www.straight.com/news/skeptic-raises-alarm-about-hpv-vaccinations	BC	3	Petra K.	4	4	1	1	Check out: www.truthaboutgardasil.org	Negative	Yes	No	No	No	No		No
	BC	3	William Jamison	4	5	1	1	Rukshana Enjjineer writes that a "...diet rich in folic acid and selenium..." makes far more sense than (being immunized with a vaccine that has been proven to be safe and effective in preventing cervical and other cancers). Nothing could be further from the truth. Is Ms Enjjineer a medical professional? Why is she dispensing medical advice? Has "...a diet rich in folic acid and selenium..." been…	Positive	No	No	No	No	No		No
	BC	3	Dee Nicholson	4	7	1	1	Apparently, Mr. Jamison needs to read more carefully, because he missed the fact that this was a quote from Dr. Elizabeth Unger of the Centers for Disease Control and Prevention, not a statement by Ms. Enjjineer. So yes, it was a medical professional speaking. As a health freedom activist, I could point out many, many other medical professionals who agree with that statement. Furthermore, Mr. Jam…	Negative	No	No	No	No	No		No
	BC	3	Mavis Y.	5	5	1	1	WJ comments that the vaccine has been proven to be safe. Hmm... that's little comfort to the inordinate number of girls who've suffered strokes, neurological problems etc. following the Gardasil shot. As for effective, well I guess those who've died following the HPV vaccine - no small number now - definitely won't be getting cervical cancer! Seems to me that WJ subscribes to blind medical worshi…	Negative	No	No	No	No	No		No
	BC	3	TheParadigmShift	5	4	1	1	Must watch documentary about vaccines including Gardasil. Lethal Injection: The Story Of Vaccination http://www.youtube.com/watch?v=7hITYIT02rA I didn't have an opinion one way or the other on vaccines before watching the film but I certainly learned a lot from watching it and urge you to watch it for yourself.	Negative	Yes	No	No	No	No		No
	BC	3	Mindano Iha	5	4	3	3	There are too many unanswered questions regarding Gardasil. It is incredible that the manufacturer Merck and other promoters know so little about the vaccine. Here's a list of what they cannot answer. (Warning may be ignored, the VacTruth link is safe): http://vactruth.com/2011/11/04/27-dirty-little-vaccine-secrets/	Negative	Yes	No	No	No	No		No
	BC	3	Question everything	7	4	1	1	Thanks for this link Mindano. There are a lot of troubling points raised here. Bet 99.99% of doctors are ignorant about these matters, too. Scarey.	Negative	No	No	No	No	No		No
	BC	3	cdsapi	5	6	1	1	Mr. Jamison displays his ignorance with great arrogance – as do so many who have swallowed the “vaccine mantra” as gospel truth. Had he done his research, he would have found that there are NO scientific clinical studies that show that Gardasil prevents cervical cancer. The time frame for the development of cervical cancer in these young girls is years, and has not yet elapsed to permit such defi…	Negative	Yes	No	No	No	No	3	No
	BC	3	TheLanarchist	6	5	1	1	we are being ruled by mad men for profit, they can stick there vaccines up there own butts.	Negative	No	No	No	No	No		No
	BC	3	Oz	2	1	1	1	If my kids were sexually active at the age of 11, then I reckon them being unvaccinated and maybe catching HPV would be the least of my worries. I'd rather they got HPV anyday of the week then risk any of the adverse effects.	Negative	No	No	No	No	Yes		Yes
http://www.winnipegfreepress.com/fpnewsfeatures/calgary-catholic-schools-reviews-policy-against-student-hpv-vaccinations--175811761.html	MB	4	kn12345	2	0	1	1	The stance against the vaccine is ridiculous. Catholic girls are having just as much sex as the non-Catholic girls. HPV is the number one cause of cervical cancer and we need to protect these young women.	Positive	No	No	No	No	No		No
	MB	4	Dorothy	0	1	1	1	freedom of religion ends when it causes demonstrable harm - in this case, denying a vaccine to young women based on dogma and superstition. health care takes precedence and the church should be charged with negligence.	Positive	No	No	No	No	No		No
http://www.winnipegfreepress.com/breakingnews/female-physicians-urge-provinces-territories-to-pay-for-hpv-vaccine-for-boys-138883214.html	MB	5	Chemicalxv	10	6	1	1	I'd get it.	Positive	No	No	No	No	No		No
	MB	5	dh1	5	4	1	1	Why?	Neutral	No	No	No	No	No		No
	MB	5	threesides	7	16	1	1	how about this? stop drugging the kids and stop letting "enterpreneurs" sell mitigating constructs that make us all sick hey?	Negative	No	No	No	No	No		No
	MB	5	eez247	6	9	1	1	Too much vaccine being produced and the drug companies need a new avenue to recover these costs	Negative	No	No	No	No	No		No
	MB	5	Slappy	17	7	1	6	An ounce of prevention is worth a pound of cure. This could save so much in terms of future health care dollars and human misery. Everyone should have access to it.	Positive	No	No	No	No	No	2	No
	MB	5	winniethepeg1	5	5	1	4	I agree with you… again!	Positive	No	No	No	No	No		No
	MB	5	PitLover	3	4	1	1	Perfectly said !	Positive	No	No	No	No	No		No
	MB	5	Slappy	1	2	2	6	The National Vaccine Information Centre is nothing of the sort. They're conspiracy nuts masquerading as a government agency.	Positive	No	No	No	No	No		No
	MB	5	winniethepeg1	0	0	2	4	Personal choice, people. If you have problems with the side effects or whatever zombie, brain eating disease you think it will cause, then don't get it. And don't judge the people who do, because it's their body, their choice. When the government regulates heroin, and starts covering it, then you can complain.	Positive	No	No	No	No	No		No
	MB	5	Skare Lewys	1	0	1	1	Sloppy the shill …..	Neutral	No	No	No	No	No		No
	MB	5	winniethepeg1	9	4	3	4	A woman I work with was just diagnosed with HPV.... her first questions to me were "what is it? how did i get it?"... i'm not a medical professional at all, but I knew enough from tv commercials to know it's a form of std. I say if women should be vaccinated against it, and prevent getting it or spreading it, so should men! Now, if they could only come out with a male birth control pill..... lol	Positive	No	No	Yes	No	No		No
	MB	5	HckStcks	2	5	1	2	Doesn't affect men in the same way and not even nearly worthy given the numbers for men. Transfats are of benefit to all is as good a comparison.	Neutral	No	No	No	No	No		No
	MB	5	cathevan	1	2	1	2	do you fix all your probs with pills? how about a little change of lifestyle	Negative	No	No	No	No	Yes		No
	MB	5	Slappy	2	1	3	6	It's not only about lifestyle. Besides, what's wrong with having a sex-life?	Positive	No	No	No	No	No		No
	MB	5	winniethepeg1	1	0	4	4	"@cathevan take your preachiness somewhere else. It's my body and my choice if I want to use birth control and protect myself from std's with vaccines. Get a life."	Positive	No	No	No	No	No		No
	MB	5	jackybacky56	1	4	1	2	HPV or the vaccine?	Neutral	No	No	No	No	No		No
	MB	5	SonnyboySlim	3	4	1	1	The virus obviously… tool	Neutral	No	No	No	No	No		No
	MB	5	jackybacky56	0	3	2	2	You got it in headingly didn't you, when you were just a bad sonny slim bad boy :(	Neutral	No	No	No	No	No		No
	MB	5	Name withheld	1	0	n/a	n/a	This comment was left by a user who has been blocked by our staff.	Neutral	No	No	No	No	No		No
	MB	5	HckStcks	3	2	2	2	985 out of 1000 agree I agree 'solely that Merck has all of the greater benefit and free advertising for a little ROI.	Negative	No	No	No	No	No		No
	MB	5	JAS	3	4	1	1	"The National Advisory Committee on Immunization also recommended the vaccine for males aged nine and older who have sex with other males." I've got to ask- how many 9, 10 and 11 year olds are out there having sex with other males? If it's so many that we need to start vaccinating at the age of 9, this country has bigger problems than the HPV virus.	Negative	No	No	No	No	Yes		No
	MB	5	Druid	3	6	1	2	It seems the goal is to manipulate kids – under the guise of so-called "comprehensive sex education" – to engage in promiscuous, casual sex as soon and as often as possible. Just look at the Ontario curriculum. Further to that, it doesn't surprise me that the supporters of said "education" are the ones that benefit most after the fact: Merck for the vaccines, and Planned Parenthood for the aborti…	Negative	No	No	No	No	Yes		No
	MB	5	Aaron3	7	2	1	1	The point is to give the vaccine to people BEFORE they become sexually active. And the age range goes up to 26 because although most have become sexually active by then, they may have had less sexual partners who are affected with virulent HPV strains 6, 11, 16 and 18. A little bit of research could have answered this for you.	Positive	No	No	No	No	No		No
	MB	5	teacher1	1	0	1	1	Hey threesides, You clearly don't know how to use the word "mitigating" or "construct" correctly. You paranoid sentiment isn't great either...	Positive	No	No	No	No	No		No
	MB	5	Northby 6	1	5	1	1	I wonder two things - one, I wonder what big pharma did to get this latest sales project so much currency, and 2 I wonder if all the people who are 'liking' this and putting out comments like 'I'd go for it' realize it will be coming out of their pocket. Because we do not have free medical care in this country, we have free prescription writing and we get to pay for the drugs.	Negative	No	No	No	No	No		No
	MB	5	scubs	0	0	1	1	if its so damn important then it should be covered for all. its bs.	Negative	No	No	No	No	No		No
	MB	5	Happyguy	3	2	1	1	Hey, here's a novel thought. How about simply instructing kids not to sleep around when they grow up? It'll do a lot better for you than any vaccine can offer. Most people don't like to hear this line of thought because they don't like being told what's good for them. But deep down, anyone with at least half a brain knows this is sound advice. And before any one says it, I know it's true because …	Negative	No	No	No	No	Yes		No
	MB	5	Druid	2	0	1	2	But that would be an oppression of their innate desire to justify the existence of vaccines, err, "explore" (in the words of the Manitoba curriculum, per se).	Negative	No	No	No	No	Yes		No
	MB	5	EDP	0	2	1	1	Sleep around all you want, just wear protection.	Positive	No	No	No	No	No		No
	MB	5	Slappy	1	2	4	6	Happyguy, I'd say your estimate of brainpower is about right. Perhaps you could offer some advice on how to teach a kid to never be raped in their life or to never have a spouse cheat on them and bring home a disease that sometimes shows no symptoms?	Positive	No	No	No	No	No		No
	MB	5	cathevan	2	2	2	2	this drug is a poison... read all about it at http://vran.org/in-the-news/hpv-human-papilloma-virus-cervical-cancer-vaccine-mercks-gardasil%C2%AE/	Negative	Yes	No	No	No	Yes		No
	MB	5	Name withheld	2	2	n/a	n/a	This comment has been removed for violations of our Terms and Conditions.	Neutral	No	No	No	No	No		No
	MB	5	Name withheld	0	2	n/a	n/a	This comment has been removed for violations of our Terms and Conditions.	Neutral	No	No	No	No	No		No
	MB	5	Denis Vandale	1	0	1	1	Yeah, let's allow these "shills" for big Pharma recommend these vaccines and ignore the growing evidence that many of these are dangerous and are crippling or killing or leaving long term negative health problems. Visit Dr. Mercola's site and see all the research he has compiled there.	Negative	Yes	No	No	No	No	1	No
	MB	5	Slappy	0	2	5	6	Any evidence that says that vaccination is dangerous ends up being falsified. Read about Andrew Wakefield.	Positive	Yes	No	No	No	No		No
	MB	5	Slappy	0	2	6	6	I looked up Dr Mercola. He's a homeopath. Enough said. Crackpot!	Positive	Yes	No	No	No	No		No
	MB	5	sickofthelies	3	0	1	1	I wonder how much money is really generated by big pharma for vaccine (preventive) compared to drugs produced to treat (reactive). I well imagine meds to treat illness like chemo drugs are far more lucrative. Vaccine is also alot cheaper than colposcopy or surgery on the cervix, anal lesion removal or problems in the throat. I also do not agree that vaccinating both boys and girls is allowing the…	Positive	No	No	No	No	No		Yes
http://www.winnipegfreepress.com/fpnewsfeatures/good-evidence-for-use-of-hpv-vaccine-in-boys-governments-vaccine-advisers-say-138000448.html	MB	6	soolkyut	2	2	1	1	Pass	Negative	No	No	No	No	No		No
	MB	6	fleeting	1	3	1	2	To all those conspiracy theorists who insist that "Big Pharma" is hiding the cures for cancer because they're not profitable... here you go. A simple vaccine to prevent HPV-initiated cancers. Hopefully the price will come down in the future as well.	Positive	No	No	No	No	No		No
	MB	6	Wizzard9	1	1	1	1	do a little research on Gardasil.... you might change your mind once you see some of the adverse reactions and lives that have been destroyed. Read the fine print...there are alot of 'may' prevent 'certain' types of cancer... pretty damn vague.	Negative	No	No	No	No	No		No
	MB	6	Soccer67	2	1	1	1	It also recommended it for males over the age of nine who have sex with other men. I hope to god no 9 year olds are having sex with anyone never mind men. DISGUSTING.	Negative	No	No	No	No	Yes		No
	MB	6	fleeting	1	0	2	2	The point is to give the vaccine BEFORE anyone is sexually active!	Positive	No	No	No	No	No		No
http://www.winnipegsun.com/2012/09/13/proponents-may-sue-calgary-catholic-school-board-over-hpv-vaccination	MB	7	Tom Langstorm	2	N/A	1	3	The Roman Catholic bishops view the vaccine as an invitation for teenage girls to become promiscuous but it's ok for every second bishop to be promiscuous with the alter boys. Makes perfect sense to me.	Negative	No	No	No	No	No		No
	MB	7	cage1	0	N/A	1	1	This is complete bull. Oh it is an invitation for girls to become promiscuious. What planet are they from. A vaccine does not make some one become active sexually the kid does. Most of the time it is peer pressure or drugs and alcohol. Sometimes drugs without concent of the person taking them aka date rape. The cathlics should get off the high horse and think of the health of the kids.	Positive	No	No	No	No	No		No
	MB	7	katznonsupporter	0	N/A	1	1	And we all know that Catholic girls are all virgins until they get married right.	Positive	No	No	No	No	No		No
http://www.winnipegsun.com/2012/10/15/hpv-vaccine-doesnt-make-young-girls-more-promiscuous-study	MB	8	Innocent, Virgin Divine	2	N/A	1	1	So it doesn't make you show your grade 7 bewbs to total strangers, and then do the nasty with total strangers?? What will they think of next?	Positive	No	No	No	No	No		No
	MB	8	Dobbie Hillhouse	2	N/A	1	1	I find it hard to believe that a little Prick..........from an injection is ever going to increase a girls interest in coitus.	Positive	No	No	No	No	No		No
	MB	8	C Alan Nault	1	N/A	1	2	“Contrary to the concerns of some parents, religious groups and others" But when have some religious groups ever let facts get in the way of what they just know?	Positive	No	No	No	No	No		No
	MB	8	333888388388	0	N/A	1	1	Oh YES it does!!	Negative	No	No	No	No	Yes		No
	MB	8	C Alan Nault	1	N/A	2	2	OK, you've stated your view, now what evidence do you have to back it up?	Positive	No	No	No	No	No		No
http://www.calgaryherald.com/health/Bishop+supports+consultation+still+backs+vaccine+schools/7448774/story.html	AB	9	Llano Gorman	0	N/A	1	9	Forcing ANY ONE to have ANY thing put into there bodys is emorle.. and should be stood up to. All of these so called shots when opened up you can find Mercury and other great things they put into these shots... not just this one.. Flue shots.. Ask them what is in these shots... then look up the huge words and find out what is truly in it. When a Government is willing to spend Millions on a Vaccin…	Negative	No	No	No	No	No		No
	AB	9	Joseph Lionel	6	N/A	1	4	First: you clearly understand little about vaccinations. It is not a conspiracy. If you wish to provide a counter-argument for vaccination, I suggest you do some academic research from legitimate sources. Second: All that is being proposed here is allowing this vaccine to be administered in a school. If parents do not want their children vaccinated then the child is not vaccinated. That is a simp…	Positive	No	No	No	No	No		No
	AB	9	Llano Gorman	1	N/A	2	9	I have ... and so should you .. but do it in a lab that is not Government Run .. Go ahead Joseph ... see it to believe it is the best way. But get the facts and not just from youtube or the Big Pharma web sites .. Mercury is in these vacs ... it is the cheap way of preserving. Sheepeole ... geez Wake Up!	Negative	No	No	No	No	No		No
	AB	9	Jane Danielson	5	N/A	1	1	Mercury is NOT in the HPV vaccine. Thimersol which is the mercury I presume you are talking about is a preservative and it is only in vaccines that come in multi-dose containers....like the flu vaccine. The HPV vaccine is in a single-dose vial so there is no Thimersol in it. There is NO MERCURY of any kind in ANY pediatric vaccines administered in Canada.	Positive	No	No	No	No	No		No
	AB	9	Llano Gorman	1	N/A	3	9	Jane .. Tell me ... why do big food and drug company's always use "big words" to hide what is really in their produces? .... right .. "Hide" .. just like lawyers .. they hide behind big words. As soon as Government, Lawmakers, and others start speaking the Language of the ordinary person then why should any one believe these people .. think about it. Do people really have the time to look up a wo…	Negative	No	No	No	No	No		No
	AB	9	Erin Peters	3	N/A	1	2	Llano, if you are going to voice such a strong opinion and make endless comments, I would recommend you articulate yourself a little better, and have some concrete proof. I find it really frustrating to read your comments and unfinished sentences to be honest. In regards to the vaccine, I myself am someone who chose to get the vaccine. Why? Because I was going every 6 months to get painful biopsi…	Positive	No	No	Yes	No	No	2	No
	AB	9	Llano Gorman	0	N/A	4	9	Making or Forcing? ... You want to be a good parent? .. You do not want your child to be singled out and put in a different room do you? .. Why is Johnny not getting a shot? .. yep no peer pressure there .... none ... Erin there are much more ways to FORCE the public to adhere to the wishes of the few. HPV Trials Conclude Effectiveness is Still Completely Unproven http://articles.mercola.com/site…	Negative	Yes	No	No	No	No		No
	AB	9	Erin Peters	1	N/A	2	2	Because it could save their lives. and I'm not sure what kind of school you went to, but I sure didn't feel peer pressure to take a vaccine...LOL. Kids aren't going to speculate on it that way. I think you are grasping at straws here Llano. I'm sorry to say, but you are making yourself look uneducated and biased Llano. Stop while you are ahead.	Positive	No	No	No	No	No		No
	AB	9	Don Wells	2	N/A	1	3	A lawsuit to force the Separate school district to provide the vaccination is still proceeding...this is a publicly taxpayer funded school, and some Bishop's opinion (in direct contradiction of the Edmonton Bishop's opinion) should not be allowed to affect the health of these girls (and boys it seems as well) for some faux imagined moral consequence...	Positive	No	No	No	No	No		No
	AB	9	Llano Gorman	0	N/A	5	9	Don .. this is why it should not. Public Funds ... going in some lobbyist hands BECAUSE you MIGHT .. Might get it? Smart .. what is the percent? 1 or 2 or half a percent? .. How many have bad reactions to this crap? .. How Much Profit does the Drug Company make from this SALE to the Government? Follow the money ... do your research .. FUD ... FEAR UNCERTAINTY AND DOUBT ... that is what they the B…	Negative	No	No	No	No	No		No
	AB	9	Don Wells	2	N/A	2	3	What? Your rambling are incoherent!	Positive	No	No	No	No	No		No
	AB	9	Llano Gorman	0	N/A	6	9	Yes .. yes I do Ramble ... try to fill in the blanks .. many chemical companies and big pharma companies spend millions on making .. drugs .. sometimes these drugs they make .. do not work soooo they still need to answer to the share holders ... they sell them .. snake oil .. just like back in the day... look at the fantastic history of .... Fluoride in the Water ...	Negative	No	No	No	No	No		No
	AB	9	Joseph Lionel	1	N/A	2	4	Developing drugs and vaccines is not a cheap process, especially in the days of government cutbacks to virtually anything to do with science. Why should they not be allow to recover the development costs and make some profit for their trouble to improve quality of life? Further, there is a time limit on how long any one company can control and profit from the drug before other companies are allow…	Positive	No	No	No	No	No		No
	AB	9	Llano Gorman	0	N/A	7	9	Good debate. However it looks like we have to learn to agree to disagree. And thank you for showing us your articulate writings ... I do not adhere to the common dissolution's of 18th century thinking ... just like I do not believe we came from Monkeys .. to believe in PROVEN methods and PROVEN research is much much better .. but when Scientific study is done .. there should be no money from comp…	Negative	No	No	No	No	No		No
	AB	9	Don Wells	0	N/A	3	3	@ Llano Gorman-- another incoherent ramble!	Positive	No	No	No	No	No		No
	AB	9	David Brown	7	N/A	1	1	Ya sure Gorman, immunizations are governments way of controlling us and the aliens shot Kennedy. Nobody is forcing anyone to take shots if they don't want them. The simple fact that a preist, with his archaic views, is actually in charge of an entire school board is what's really scary. He should be a symbolic figure head, something like the queen is in Canada with no real powers or influence on …	Positive	No	No	No	No	No		No
	AB	9	Llano Gorman	1	N/A	8	9	Dave its not the church thing that I am basing my view on. It is the fact that Big Pharma is in the offices of every MP just about everyday .. lobbying .. and lobbying .. and .. when you find out that they ... substitute different additives so they can Make more and more profit and we the public are being feed a bunch of toxic B of S .. is starting to make me see Red .. and Wow .. Aliens shot Ken…	Negative	No	No	No	No	No		No
	ON	9	Pat Donlan	1	N/A	1	1	The chemtrails already have aerosol vaccines in them anyway.	Mixed	No	No	No	No	No		No
	AB	9	Llano Gorman	1	N/A	9	9	Pat ... do they have Cherry Flavor?	Negative	No	No	No	No	No		No
	AB	9	John Landry	0	N/A	1	1	I'm all for vaccinating the girls because we have to start culling the population now, before it's too late! Oh wait...was that my outside voice? Sinners repent! Don't want to get HPV, don't have sex. That way there's no need for a vaccination. Simple eh? Wait a minute...what's that? Only 3-5% of young girls with HPV will be at risk of cancer? Say what? And the serious side effects from a vaccine…	Negative	Yes	No	No	No	No	1	No
http://www.calgaryherald.com/health/Catholic+schools+consult+parents+vaccine/7442443/story.html	AB	10	Joseph Lionel	0	N/A	3	4	I am flummoxed by the view that getting a vaccine is a moral issue. I hear the concern about it leading to promiscuity by instilling a false sense of security; however, if these students are educated properly about the vaccine, the risks of sex and yes, even how to make sex safer, then it seems the "risk" of greater promiscuity would be mitigated. After all, if the Roman Catholic School Board is …	Positive	No	No	No	No	No		No
	US	10	Shacoria Robinson	0	N/A	1	2	Yes, but I'm sure it's the school board's position(being that theyr'e catholic) that they should be preventing the kids from having sex in the first place. It seems to me that if someone is at a Catholic school, then they should be living a Catholic lifestyle(i.e. not having sex until marriage). Otherwise they should just go to a public school or a private(non-religious) school. That way they can…	Negative	No	No	No	Yes	Yes		No
	AB	10	Joseph Lionel	0	N/A	4	4	That is a good point but Catholic schools are public schools. Like the regular public system, they must accept all students into their ranks, regardless of their religious affiliation. The only difference is that they do it with a Catholic focus. They can educate the youth all they like about the alleged moral dangers of pre-marital sex but it wont stop many of them from doing it anyway (after al…	Positive	No	No	No	No	No	2	No
	US	10	Shacoria Robinson	0	N/A	2	2	Ah, I see. Your school system must be a bit different than ours. Here, Catholic schools are considered private schools just like non religious private schools and you have to pay to attend them(sort of like college), so it's a completely different thing.	Negative	No	No	No	Yes	Yes		No
	AUS	10	Thomas Lynch	0	N/A	1	2	Parents alone have the responsibility to educate their children in these matters, and if they are Catholic they can do no other than from The Catholic teaching of Chasity for all unmarried people. The Vaccine will lead to even more promiscuity just as the Pill has.	Negative	No	No	No	Yes	Yes		No
	US	10	Kevin Murray	0	N/A	1	1	Two recent scientific studies have shown that this is not true; the vaccine does not lead to promiscuity. It does prevent cervical cancer.	Positive	Yes	No	No	No	No		No
	AUS	10	Thomas Lynch	0	N/A	2	2	Chasity is still the answer I follow 2000 years of the wisdom of Holy Church.	Negative	No	No	No	Yes	Yes		No
http://www.calgaryherald.com/health/Catholic+school+face+legal+challenge+over+refusal+offer+vaccine/7239723/story.html	AB	11	Sylvia Mityok	5	N/A	1	1	Everyone take note, Merck, who is the manufacturer of Gardasil, is making billions of dollars from the sale of this vaccine. It prevents a sexually transmitted disease, not cancer. I had cervical cancer, but have never had any STD. So, first of all, this vaccine may give a false sense of security. Having HPV does not necessarily cause cancer just as cigarette smoking and sunbathing also does not …	Negative	No	No	Yes	No	No	1	No
	AB	11	Sandy Lunoe	3	N/A	1	1	This may result in thousands upon thousands of cancer cases. HPV vaccines may cause cancer in several ways: - The vaccines have not been tested for carcinogenicity. - Recombinant HPV DNA (discovered in Gardasil by an independent lab) may cause cancer. - Replacement, where virus strains are always replaced by others, may result in the new strains being more carcinogenic than the original ones. Unt…	Negative	No	No	No	No	No		No
	AB	11	Cynthia Parker	3	N/A	1	1	This is ridiculous. The HPV vaccine is very dangerous, stopped in India and Spain when it killed girls there. It has killed over a thousand girls in the US, and left thousands more permanently disabled, like Zeda Pingel, rendered incapable of eating or breathing on her own, or walkiing or talking, within weeks of getting the vaccine. Regular Pap tests for sexually active women, or DNA tests for e…	Negative	No	No	No	No	No		No
http://www.calgarysun.com/2012/11/28/calgary-catholic-school-district-approves-controversial-hpv-vaccinations	AB	12	Johndilinger	14	4	1	12	I will not allow my Daughter to receive this Vaccine. It amazes me how people let fear mongering to give a vaccine that has no proven long lasting effects, has no evidence that it actually prevents anything. You better pray there is no other consequences you inflict on your kids because you gave them this Vaccine.	Negative	No	No	No	No	No		Yes
	AB	12	Johndilinger	9	0	2	12	HPV is only 1 of many causes of Cervical Cancer. Other possible risk factors include the following: Giving birth to many children. Having many sexual partners. Having first sexual intercourse at a young age. Smoking cigarettes. Using oral contraceptives I.E. using a form of birth control. Having a weakened immune system. So the only way to Guarantee prevention is abstinence until the right age th…	Negative	Yes	No	No	No	Yes		Yes
	AB	12	anoninlittlebombay	3	9	1	2	I had cervical cancer cause by this virus, I had an abnormal pap smear that raised concerns with my doctor, we monitored it and it progressed quickly(according to him) when the smears were at lv3 then it was suggest that if I wanted a child I had better do it then as the future was no guarantee, got pregnant had my daughter within a yr of that by the time I had her I was lv4, less than a year aft…	Positive	No	No	Yes	No	No	2	Yes
	AB	12	Johndilinger	10	1	3	12	Yes but it's better than suffering from Brain Damage, seizures and violent allergic reaction that can occur from Vaccines.	Negative	No	No	No	No	No		Yes
	AB	12	anoninlittlebombay	1	4	2	2	As I said it's has been 4 yrs since she got vaccinated and no side effects and I'm still barren from the disease. I did not want my daughter to suffer the way I did, my decision, my daughter and my money that paid for it. And how many of us have had vaccines and how many of us are suffering from side effects of those vaccines?	Positive	No	No	Yes	No	No		Yes
	AB	12	Jim_knuckles	4	0	1	8	Well spinning the Chamber in a gun is only 1 in 6 is full so only 1 chance in 6 will kill. Putting the gun away is the only way to guarentee to not get shot.	Negative	No	No	No	No	Yes		No
	AB	12	ihgfedcba	2	9	1	62	They said the same thing regarding the polio vaccine. Polio has now been wiped out due to the mass vaccination in schools. If you do not want your daughter to get the vaccine do not sign the consent form. simple. Keep in mind your daughter will be the one who will be suffering the consequences of your ill informed decisions, not you. It is you who have allowed the fear mongering to influence you …	Positive	No	No	No	No	No	2	Yes
	AB	12	justsayno	11	1	1	52	There is ABSOLUTELY NO PROOF THAT THIS IS A LIFE SAVING VACCINE!	Negative	No	No	No	No	No		Yes
	AB	12	Rosehawk1	1	10	1	17	BS	Positive	No	No	No	No	No		No
	AB	12	ihgfedcba	1	10	2	62	And what anti-vax conspiracy site did you get your information from?	Positive	No	No	No	No	No		Yes
	AB	12	justsayno	10	2	2	52	I've been following this vaccine ever since it was released in the states in 2006. Last time I checked VAERS (which was years ago) there were already over 10,000 adverse effects from the HPV vaccine. Where do you get your information from?	Negative	Yes	No	No	No	No		Yes
	AB	12	ihgfedcba	1	10	3	62	American and British Medical Journals. Now where are you getting your information from? Data entered into VAERS does not validate it to be caused by a vax.	Positive	No	No	No	No	No		Yes
	AB	12	Winston Smith	0	9	1	1	Do these journals have names? Who funds them? Are they acknowledged in the scientific community as being completely independent from the drug manufacturers whose products they so gladly endorse for human consumption? Information written in an unnamed medical journal does not validate it to be accurate. ps: Don't forget your flu shot. This year's strain might actually be the same as last year's...…	Negative	No	No	No	No	No		No
	AB	12	ihgfedcba	0	9	4	62	Thank you for the reminder but it will be my choice as to whether I will get the flu shot not yours. But no, I will not be getting the flu shot. I have never gotten a flu shot ever. I guess I do not need one as my immune system must be strong enough to fight any bug that comes near me. I will save it and let someone who needs it more than I do receive it instead. Had the flu in 1999. I remember w…	Positive	No	No	No	No	No		Yes
	AB	12	Rosehawk1	0	10	2	17	A shame you stopped, following the statistics in 2008.	Positive	No	No	No	No	No		No
	AB	12	Foreman776	1	10	1	3	Whether you do or whether you don't, you better be right. Good idea to gamble with your kids health... On another note ... these people in this picture look like real party animals don't they? Good ole' Catholic stereotypical "smiling is a sin" looks on their faces!	Positive	No	No	No	No	No		No
	AB	12	justsayno	9	2	3	52	Considering that 90% of women are able to fight off the virus on their own, the only true way of catching cervical cancer early so it can be cured (by Health Canada's own admission) is by annual pap smears, since there are no studies on long term health effects, I'm with Johndilinger on this one. But love the fact that this may curb the Catholics out of control breeding like rabbits. And this wil…	Negative	Yes	No	No	No	No		Yes
	AB	12	JoeBlow4444	2	10	1	8	Do you really think that all Catholic women don't use birth control? Every single one I know uses some form of it. Just more proof that the Catholic Church is way out of touch with reality and needs to evolve with the times.	Positive	No	No	No	No	No		No
	AB	12	justsayno	8	2	4	52	Good for the Catholic women, using common sense instead of crap out of the bible. My mistake, it does not say anything in the bible that women should not use birth control.	Negative	No	No	No	No	No		Yes
	AB	12	ihgfedcba	0	11	5	62	Relying on annual pap smears to keep cervixs healthy is costing our health care system billions.	Positive	No	No	No	No	No		Yes
	AB	12	justsayno	9	0	5	52	Dumb dumb, women are going to have annual pap smears regardless of whether or not they take this vaccine.	Negative	No	No	No	No	No		Yes
	AB	12	ihgfedcba	1	9	6	62	Wrong again. A healthy history of pap smears is now only requiring a pap smear every 3 years. I have gone 12 years without one.	Positive	No	No	Yes	No	No		Yes
	AB	12	justsayno	10	0	6	52	Well good thing you got the vaccine, just continue hoping for the best, and make sure you don't do anything that may catch cervical cancer early.	Negative	No	No	No	No	No		Yes
	AB	12	Rosehawk1	0	10	3	17	As a survivor, your comment is unwarranted or wanted. Through rape, molestation & unfaithfulness of a partner many women & men didn't ask for what happened to them.	Positive	No	No	Yes	No	No		No
	AB	12	ihgfedcba	0	10	7	62	Aren't you nice. Try some kindness, you will be far healthier for it.	Positive	No	No	No	No	No		Yes
	AB	12	Johndilinger	9	0	4	12	That's because of your laziness, Doctors do not recommend a 12 year gap.	Negative	No	No	No	No	No		Yes
	AB	12	ihgfedcba	0	9	8	62	Not being lazy with my health. Not having a family doctor and living a healthy lifestyle, knowing my body and having no family history of cancer made it okay. Not into wasting healthcare dollars by running to a doctor when not necessary.	Positive	No	No	Yes	No	No		Yes
	AB	12	Johnny_English	8	0	1	2	Your choice to not get a pap smear for 12 years is just that choice. If you develop Cervical Cancer it is by your own fault and no one else.	Mixed	No	No	No	No	No		No
	AB	12	ihgfedcba	0	2	9	62	My choice was the right one. My cervix looks beautiful (doctors words). I do not rely on pap smears and other evasive medical diagnosis methods to keep me healthy. I rely on living life wholesome and in a state of awareness. 105 years of health history also tells me I do not need to waste money on having them. If I lived a different lifestyle and previous testing showed different then I would be …	Positive	No	No	Yes	No	No		Yes
	AB	12	Rosehawk1	0	10	4	17	Very unreliable test too.	Positive	No	No	No	No	No		No
	AB	12	Foreman776	0	10	2	3	Did you know that 90% of all statistics are B.S.?	Positive	No	No	No	No	No		No
	AB	12	Johnny_English	9	0	2	2	So this means everything you say is pretty much B.S.	Negative	No	No	No	No	No		No
	AB	12	Rosehawk1	0	10	5	17	That's the advantage of thinking for oneself. So don't let your daughter get the vaccine. But leave the rest of us alone with that chip on your shoulder. I do hope your daughter does keep her health.	Positive	No	No	No	No	No		No
	AB	12	Johndilinger	11	5	5	12	Vaccines are only to fatten the wallets of the Pharmaceutical companies as they drain the tax payer dollars.	Negative	No	No	No	No	No		Yes
	AB	12	justsayno	6	0	7	52	Are those the same pharmaceutical companies that Health Canada are in bed with?	Negative	No	No	No	No	No		Yes
	AB	12	GeneralWolfe1	10	10	1	1	Ya damn that smallpox vaccine!!! You are an idiot.	Positive	No	No	No	No	No		No
	AB	12	ChuckieCB	14	0	1	2	you shouldn't call others idiot for having an opinion. If you cannot counter it with logic and a valid response please keep your rude comments to yourself.	Neutral	No	No	No	No	No		No
	AB	12	Shack23	3	10	1	4	He should not call others idiots or any other names for having an opinion, but vaccines save lives in some cases and prevent the spread of many diseases. That is a fact.	Positive	No	No	No	No	No		No
	AB	12	Aton Rekoobecaf	4	9	1	4	One word... polio. You're argument is null and void.	Positive	No	No	No	No	No		No
	AB	12	ChuckieCB	11	1	2	2	They had proven what effects the Polio vaccine would have on those people that received it. Your arguements is like saying lets add salt to the Flu Vaccine and then sell it off as a HPV Vaccine. Your argument is flat and useless.	Negative	No	No	No	No	No		No
	AB	12	Aton Rekoobecaf	4	9	2	4	Thanks for explaining you have zero knowledge of how vaccines are developed. My arguement is vaccines have been proven to work. They have saved countless lives and saved people from some debilitating diseases. It's not all about the money. You did not get "my argument" correct. Please don't speak for me, you clearly have no idea what you are talking about.	Positive	No	No	No	No	No		No
	AB	12	Johndilinger	9	0	6	12	Well according to Health Canada all Vaccines have side effects. Some mild some serious. This one DTaP vaccine in particular has some extremely nasty side effects. Long-term seizures, coma, or lowered consciousness, and or Permanent brain damage. Influenza side effects can cause Life-threatening allergic reactions. MMR vaccine side effects, Deafness,Long-term seizures, coma, or lowered consciousne…	Negative	No	No	No	No	No		Yes
	AB	12	Johndilinger	9	1	7	12	Some Vaccines have helped people as some have helped in the immediate but ended up being the cause fo worse long lasting side effects. So you show no real knowledge as you think everyhing jabbed in an arm is safe.	Negative	No	No	No	No	No		Yes
	AB	12	Aton Rekoobecaf	1	4	3	4	You have a link to a legitimate scientific study of an example, do you?	Positive	No	No	No	No	No		No
	AB	12	justsayno	3	2	8	52	Do you mean all the legitimate scientific studies of this vaccine done by the manufacturer? Remember the same thing was done by tobacco companies and their smokes are perfectly safe...	Negative	No	No	No	No	No		Yes
	AB	12	ihgfedcba	5	0	10	62	The doctors that first created this anti vax fear now have retracted and admitted their false data in the studies.	Positive	No	No	No	No	No		Yes
	AB	12	justsayno	1	1	9	52	Where's your source?	Negative	No	No	No	No	No		Yes
	AB	12	ihgfedcba	2	1	11	62	The British Medical Journal	Positive	No	No	No	No	No		Yes
	AB	12	justsayno	1	2	10	52	No it's more like WHO was able to determine that 20 countries erroneously received the H1N1 but are unable to determine which pharma companies are putting it in their vaccines. Who knew warfarin (blood thinner) was originally used as rat poison.	Negative	No	No	No	No	No		Yes
	AB	12	justsayno	1	2	11	52	One word...swine flu. You're argument is null and void.	Negative	No	No	No	No	No		Yes
	AB	12	ihgfedcba	0	0	12	62	The year H1N1 came out, there was a massive increase of people who got the flu shot that year. The number of deaths and flu cases were way down for that year.	Positive	No	No	No	No	No		Yes
	AB	12	ihgfedcba	4	10	13	62	Do you know how much it costs to develop a vaccine? Vaccines do not make much money for Big Pharma. Vitamins, pain killers and cold remedies is where those huge profits come from.	Positive	No	No	No	No	No		Yes
	AB	12	justsayno	10	0	12	52	Bullshit. In the states this vaccine costs $500. Do you know of any vitamins or pain killers or cold remedies that cost that much? Yeah I didn't think so.	Negative	No	No	No	No	No		Yes
	AB	12	calgaryoverrated	1	9	1	14	Thats the states where everything medical costs an overwhelming amount compared to the rest of the world!	Positive	No	No	No	No	No		Yes
	AB	12	justsayno	9	1	13	52	Well it's pretty comparable when our dollar is almost at par.	Negative	No	No	No	No	No		Yes
	AB	12	calgaryoverrated	1	9	2	14	So tell me how much the Laser treatment performed in a hospital with 1 doctor and 3 nurses to do the treatment? Im guessing a heck of alot more then $500!	Positive	No	No	No	No	No		Yes
	AB	12	justsayno	7	3	14	52	Ask the Merck shill ihgfedcba.	Negative	No	No	No	No	No		Yes
	AB	12	ihgfedcba	1	9	14	62	And 2 years of medical treatment for HPV costs what? Burial costs are high too. That $500 is the doctors visit cost not the price of the vaccine.	Positive	No	No	No	No	No		Yes
	AB	12	justsayno	9	0	15	52	What a freaking shock that everyone dies, so your burial cost bullshit is actually for everyone. Better start saving now. The $500 price tag is for the actual vaccine, not the doctors visit.	Negative	No	No	No	No	No		Yes
	AB	12	ihgfedcba	0	8	15	62	Be more selective in your reading. Conspiracy sites do not rely on facts and only make you look foolish.	Positive	No	No	No	No	No		Yes
	AB	12	justsayno	10	1	16	52	BTW they are even giving this vaccine to pregnant women and a gal I know from Lac La Biche lost her baby because of it.	Negative	No	No	Yes	No	No		Yes
	AB	12	Foreman776	2	9	3	3	Is it documented that this gal you know lost her baby because of the vaccine? I call total B.S. People like you that throw out random b.s. stats and anecdotes are the whole problem.	Positive	No	No	No	No	No		No
	AB	12	Rosehawk1	0	9	6	17	Maybe not painkillers but hospital costs, Dr. visits, surgeries, radiation, Ect.	Positive	No	No	No	No	No		No
	AB	12	Rosehawk1	0	1	7	17	Once again if it's tax dollars your worried about than telling parents to go outside the school to get the vaccine is more costly since it drains the health care system. I survived cervical cancer & because of medications, surgery, radiation & doc. visits ect. your tax dollars have paid thousands for my care. Another women kept record of her health costs & to date that amount $ 2,000,000.00. But …	Positive	No	No	Yes	No	No	2	No
	AB	12	JohnathanGalt	7	3	1	37	Now you can have experimental vaccines administered to your daughters in the comfort of their own Catholic school. Next the schools should buy malpractice insurance for when the HPV vaccine damage lawsuits start in 10 to 15 years (and keep a record of the names of all the proponents, so that they can be named as defendants.)	Negative	No	No	No	No	No		No
	AB	12	RValois1	5	3	1	6	Johnathan you are entited to your own opinions - are you an MD or are you just fearmongering? This vacine has been tested and is a proven antivirus drug! what are you baseing your facts on - the bible!?	Positive	No	No	No	No	No		No
	AB	12	JohnathanGalt	4	1	2	37	Talk to me in 10 to 15 years from now. We'll see.	Negative	No	No	No	No	No		No
	AB	12	416elenorRIGBYjustactingCASULL	4	3	1	8	Ya, it's just like that old polio scam! Everybody knows that polio just got tired of crippling humans and got on the first flying saucer outta here!	Positive	No	No	No	No	No		No
	AB	12	JohnathanGalt	1	0	3	37	Show me the vast epidemic of cervical cancer that is caused by HPV.	Negative	No	No	No	No	No		No
	AB	12	calgaryoverrated	2	1	3	14	It has been Proven to be a leading cause of Cervical Cancer! The issue is the media once again has not given all the information on the virus itself... HPV can be contracted in many more ways then just sex... It can be caused by poor hygiene, Not washing hands before using the washroom and about 500 other causes. Vaccinate your teenage daughter and protect her from a horrible disease that Does le…	Positive	No	No	No	No	No		Yes
	AB	12	justsayno	1	1	17	52	Since only 360 women die in Canada every year from cervical cancer, by Health Canada's own admission, if caught early enough it can be CURED. No vaccine necessary.	Negative	No	No	No	No	No	1	Yes
	AB	12	calgaryoverrated	3	1	4	14	1 Woman dieing from it is too many and for those that do live are more likely to get ovarian cancer (Which is NOT curable) and higher risk of breast cancer! The cure for cervical is being gutted! Even in the early stages of HPV it is a vicious treatment and leaves a lot of scare tissue left in the uterus and cervix that causes a lot of pain and will decrease the odds of being able to have childre…	Positive	No	No	No	No	No		Yes
	AB	12	justsayno	1	1	18	52	More people die from car accidents every year, should we ban cars? Are you talking about all those breast cancer patients who didn't actually have breast cancer in the first place? Don't worry about my daughter, she will be just fine. And I would go the naturopathic route anyways because chemo and radiation are not the cure for cancer. If she did have cancer I would either go the Essiac route or …	Negative	No	No	No	No	No		Yes
	AB	12	ihgfedcba	2	1	16	62	Yeah, the naturopathetic worked well for Steve Jobs.	Positive	No	No	No	No	No		Yes
	AB	12	justsayno	1	0	19	52	Nice try Merck Shill.	Negative	No	No	No	No	No		Yes
	AB	12	Flash_bazbo	0	1	1	3	Thank you, you just brightened my day with a good laugh.	Positive	No	No	No	No	No		No
	AB	12	Rosehawk1	0	1	8	17	Where on earth do you come from. For every one of those who die thousands of survivors put up with life altering effects for the rest of their lives, Let's get you & the families of these dead women in one room maybe you'll learn something.	Positive	No	No	No	No	No		No
	AB	12	ihgfedcba	0	1	17	62	Do you really believe that an annual pap smear is catching it early? A woman could be infected with the virus the day after the annual virus and be dead before the next year smear. How about taking some responsibility and taking advantage of living a healthy lifestyle, modern technology and all the tools available to stay healthy without costing our health care billions.	Positive	No	No	No	No	No		Yes
	AB	12	justsayno	1	0	20	52	Dead before next year? What a bunch of fearmongering. By Health Canada's own admission the HPV can be CURED if caught early enough by annual pap smears. Are you disputing what Health Canada says? Don't worry, I'm already into the healthy lifestyle long before you were even aware of it.	Negative	No	No	No	No	No		Yes
	AB	12	ihgfedcba	1	1	18	62	All cancers can be cured if caught early. Treating cancer costs healthcare billions. Prevention is way less expensive.	Positive	No	No	No	No	No		Yes
	AB	12	justsayno	1	0	21	52	Don't worry, my family and I will be diagnosed and treated by a naturopath which doesn't cost the healthcare system anything at all. So you are worrying your pretty little head for nothing.	Negative	No	No	No	No	No		Yes
	AB	12	calgaryoverrated	0	0	5	14	Thats great until your family needs real medical care because your Naturopath failed and You are truly sick! Then the Health care system has to spend alot of money to treat you because the disease has gone to far!	Positive	No	No	No	No	No		Yes
	AB	12	Rosehawk1	0	0	9	17	Just go to the Tom Baker Cancer clinic. There will be a lineup.	Positive	No	No	No	No	No		No
	AB	12	Rosehawk1	4	3	10	17	Once again you are short sighted. If whats in the vaccine scares you then you should see the ingredients and side effects to the medication I now have to take to make my life tolerable ( over 15 pills a day) that should scare you more. That leaves you with only one last argument. That parents teaching abstinence should be enough even if our priests can't be taught that. Or is there another reason…	Positive	No	No	No	No	No		No
	AB	12	JohnathanGalt	4	1	4	37	I don't care about abstinence, as far as I am concerned, if consenting adults want to f#% their brains out, they should be able to do so without interference from church or state. I just think that: 1. It's stupid to put experimental foreign substances into your body, when no one knows what the effects will be in the near and long term, and I think it's even stupider to do so because the governme…	Negative	No	No	No	No	No	1	No
	AB	12	416elenorRIGBYjustactingCASULL	2	1	2	8	Big Pharma as you call it will be on the hook in 10 or 15 years to payout 100 times the gobs of money if as George Carlin once suggested the recipients of this serum get to 65 and one leg gets shorter than the other. What in the world makes you think they would risk that kind of liability on something not properly tested? Your arguement negates itself by the very inference of greed by Big Pharma.	Positive	No	No	No	No	No		No
	AB	12	JohnathanGalt	1	0	5	37	Since the fools in government are promoting this vaccine, the blame and cost will be foisted upon taxpayers. The big pharma executives and shareholders will be long gone, having laughed all the way to the bank. BTW, George Carlin didn't trust the government as far as he could spit. He would be the last person to recommend injecting children with government-sanctioned experimental vaccines.	Negative	No	No	No	No	No		No
	AB	12	justsayno	0	0	22	52	The fools at the Public Health Agency of Canada are promoting this because they once told me they get a lot of their information from the media. LOL	Negative	No	No	No	No	No		Yes
	AB	12	Rosehawk1	0	0	11	17	Now I understand why your getting confused. We are talking about children not consenting adults. 1. My sources say the vaccine is safe as any medication can be . 2.Why should I not have the right as everyone else has. By offering it at school it's more convenient and cheaper to the tax payer. 3.For once I agree with you, although, ideally this would never happen. There will always be these kind o…	Positive	No	No	No	No	No		No
	AB	12	JohnathanGalt	0	0	6	37	In 2007, Merck spent $101.4 Million dollars to advertise and lobby for Gardasil. That year, they made over $1.5 Billion dollars on worldwide sales of the HPV vaccine. Part of the propaganda campaign was used to create the "fictitious" impression that the vaccine is safe (there is no long-term data upon which to make this claim). You are being conned by Big Pharma executives that are laughing all …	Negative	No	No	No	No	No		No
	AB	12	calgaryoverrated	4	1	6	14	I truly wish parents and the Media would educate themselves and their children on the HPV virus.... It is NOT just contracted by sex! A girl can pick it up anywhere... Before you decide to blow off the vaccine do your homework on the virus and you will be quite surprised to find out what it really is. Is any parent aware of the treatment in the first stages of HPV? It is very evasive surgery - Th…	Positive	No	No	No	No	No		Yes
	AB	12	Kendra Jamieson	2	0	1	1	This comes from the generation who have never seen polio, diiptheria, smallpox, ect. Have you seen what these diseases do to you? Did you know because of vaccines, we have irradicated some of these diseases? Would you rather be in a wheelchair for the rest of your life or blinded by sores? I would rather take a needle in the arm thanks! Its because of people not getting vaccinated, we are all bei…	Positive	No	No	No	No	No	2	No
	AB	12	justsayno	0	1	23	52	There is NO PROOF THAT THIS VACCINE ACTUALLY WORKS.	Negative	No	No	No	No	No		Yes
	AB	12	ihgfedcba	0	0	19	62	There is NO PROOF THAT THIS VACCINE DOES NOT WORK.	Positive	No	No	No	No	No		Yes
	AB	12	maximusandrewday	4	2	1	1	Its about time, These vaccines are important and its the only protection that we have. Children should NOT be allowed to be in schools without all vaccines being up to date.	Positive	No	No	No	No	No		No
	AB	12	ihgfedcba	0	0	20	62	I had to show proof of vaccination to register children into public school even preschools.	Positive	No	No	No	No	No		Yes
	AB	12	justsayno	0	0	24	52	Of course you did. How much did Merck pay you to say that?	Negative	No	No	No	No	No		Yes
	AB	12	ihgfedcba	0	0	21	62	I am doing that good of a job? thank you.	Positive	No	No	No	No	No		Yes
	AB	12	justsayno	0	0	25	52	Oh move back to the states.	Negative	No	No	No	No	No		Yes
	AB	12	Caperj	8	8	1	2	Amen, finally science and common sense prevail for the greater good!	Positive	No	No	No	No	No		No
	AB	12	JohnathanGalt	13	1	7	37	Yes, the science of how to fleece suckers with big pharma FUD campaigns.	Negative	No	No	No	No	No		No
	AB	12	Rosehawk1	3	8	12	17	You won't care about money & pharma FUD campaigns if it's your child who gets sick. I'm a cervical cancer survivor & has cost your health care system thousands much cheaper to give vaccine in schools. Most of Canada is celebrating a great advance in the fight against cancer. To give a vaccine that saves your child is a "no brainer".	Positive	No	No	Yes	No	No		No
	AB	12	JohnathanGalt	12	1	8	37	There is no proof that the HPV vaccine is effective, and no long term studies to show whether or not it is harmful.	Negative	No	No	No	No	No		No
	AB	12	calgaryoverrated	2	0	7	14	Well Johnathon I really hope as a father your daughter doesn't end up with the Virus, ends up in the hospital for multiple laser treatments to try and control it and then the worse case ends up with cervical cancer and has to have a full hysterectomy at 30 years old! I will take my chance with the vaccine so my daughter never suffers!	Positive	No	No	No	No	No		Yes
	AB	12	JohnathanGalt	0	0	9	37	Unfortunately, bad things happen to people who don't necessarily deserve them. However, using this reality to create FUD in order to give government more legitimacy and to enrich companies like Merck (who made $1.5Billion from Gardasil sales in 2007) at taxpayer expense, is typical socialist manipulation.	Negative	No	No	No	No	No		No
	AB	12	justsayno	0	0	26	52	And don't count on having any grandkids either. Polysorbate 80 causes infertility in rats and that just happens to be one of the ingredients in this HPV vaccine. Funny that Merck started an organization called HPV Canada so they can direct market their drug. You do know that direct marketing isn't allowed in Canada?	Negative	No	No	No	No	No		Yes
	AB	12	calgaryoverrated	2	0	8	14	You wont be having grandchildren if your daughter is too scarred to conceive or worse has to have a hysterectomy in her 20s! Seems like a lot of pain for your child to go through because parents don't fully understand the disease itself or the repercussions your daughter will face! Keep in mind most teenage girls dont understand the importance of a pap smear test yearly until they get into the la…	Positive	No	No	No	No	No		Yes
	AB	12	justsayno	0	0	27	52	I fully understand the disease and know that this HPV vaccine only addresses 4 of over 70 types. The fact remains that 90% of women can fight this off on their own within 2 years. My wife had HPV, how come she's not dead or had a hysterectomy? Now if you're asking me if I trust Merck enough to inject some of their crap in my daughter, the answer is no.	Negative	Yes	No	Yes	No	No	1	Yes
	AB	12	ihgfedcba	1	0	22	62	Let us assume you are right, which I doubt 100%. What about that 10% that cannot fight it on their own? It is that 4 out of 70(I am sure your numbers are not accurate), are the leading types that causes cervical cancer that this vaccine prevents.	Positive	No	No	No	No	No		Yes
	AB	12	justsayno	0	0	28	52	Dumb dumb, look it up on Health Canada. Does Merck pay you?	Negative	No	No	No	No	No		Yes
	AB	12	calgaryoverrated	1	0	9	14	She is one of the lucky few... I had the virus at 27, Cervical cancer at 29 and a hysterectomy at 30! If you fully understand the disease then you know the treatment of HPV is Laser Therapy and you should Know it is NOT just sexually transmitted! Im not sure where you get that the female body can fight it off on its own in two years when HPV stage 1 involves Laser treatment (Lasers are not normal…	Positive	No	No	Yes	No	No	2	Yes
	AB	12	justsayno	0	0	29	52	She caught before I met her and her body was able to fight it off. The fighting it off within two years was on the pamphlet that was sent home. Mind you I had to bitch about it until they put it on there. Do you think they would have put it on there, if it wasn't true?	Negative	No	No	Yes	No	No		Yes
	AB	12	ihgfedcba	1	0	23	62	I will choose the better odds of getting the vaccine and be protected from getting it at all than not vaccinating and have to take 2 years to cure all on its own if it is possible, thanks.	Positive	No	No	No	No	No		Yes
	AB	12	justsayno	0	0	30	52	From the person who is paid to promote it. LOL	Negative	No	No	No	No	No		Yes
	AB	12	ihgfedcba	0	0	24	62	Oh yeah, the 6 figure salary is awesome. Now go out and buy some more "natural" products so I can make more money.	Positive	No	No	No	No	No		Yes
	AB	12	calgaryoverrated	0	0	10	14	You had to fight them to put it on the pamphlet? Then no I wouldn't believe it... Are you a doctor? Are you working in the Health System? Who are you to make the rules of what is right and wrong info? If the pamphlet was issued by the Health care system then why wouldn't they put it on there? As for your wife I hope she still has yearly testing and I hope you do too! You could easily give it back…	Positive	No	No	No	No	No		Yes
	AB	12	justsayno	0	0	31	52	I'm not asking you to believe anything. Check the pamphlet yourself...it's there in black and white. While your at it, check the VAERS and see what that adverse reaction number is up to now, cause a few years ago it was over 10,000 adverse reactions. Please do not worry your pretty little head about my family, we will be diagnosed and treated by a naturopath which costs the health care system abs…	Negative	No	No	No	No	No		Yes
	AB	12	Rosehawk1	0	0	13	17	I know half the stuff you write about is to get a reaction. In all seriousness please pay attention. Most HPV cases do not disappear over 2 yrs. I too thought I was safe only to get cervical cancer after 13yrs. That you love your wife is obvious so from the bottom of my heart please tell her to keep checkups and take whatever medicine or go to whatever doc. you deem is good for her. JUST DON'T IG…	Positive	No	No	Yes	No	No		No
	AB	12	ihgfedcba	1	0	25	62	There was no long term proof the polio vaccine worked either. This vaccine has been in development for many many years. It is not like they just cooked it last year. It is tin foil hatted people like you that chicken pox and whooping cough are now back. 20 years ago, these 2 diseases were following polio in being extinct. Or is this vaccine refusal your way of eliminating the population.	Positive	No	No	No	No	No		Yes
	AB	12	justsayno	0	0	32	52	Oh shut up you Merck shill.	Negative	No	No	No	No	No		Yes
	AB	12	ihgfedcba	0	0	26	62	You can't shut up the truth.	Positive	No	No	No	No	No		Yes
	AB	12	justsayno	0	0	33	52	Oh good, tell us exactly how this HPV vaccine saved you?	Negative	No	No	No	No	No		Yes
	AB	12	calgaryoverrated	1	0	11	14	I wish the vaccine was available in my youth! I wouldn't have had to go through the nightmare of developing Cervical cancer!	Positive	No	No	Yes	No	No		Yes
	AB	12	justsayno	0	0	34	52	There is ABSOLUTELY NO PROOF THAT THIS VACCINE WORKS.	Negative	No	No	No	No	No		Yes
	AB	12	calgaryoverrated	1	0	12	14	You have NO proof it doesn't work! If there are less women suffering from HPV and Cervical cancer then I would say it works!	Positive	No	No	No	No	No		Yes
	AB	12	Rosehawk1	0	0	14	17	It wasn't available, so there you go you made my point.	Positive	No	No	Yes	No	No		No
	AB	12	Rosehawk1	0	0	15	17	Exactly it wasn't available yrs ago for me so you made my point. If you don't agree with the vaccine, that's fine JUST SAY NO! I want the option the rest of Canada enjoys. To be able to have the vaccine available in schools for efficiency sake & at a lower cost for the taxpayer. What I don't need is a narrow minded Bishop or nay sayer thinking they have the right to make the decision for me. By t…	Positive	No	No	Yes	No	No		No
	AB	12	Guest 1	5	6	1	1	..about time..	Positive	No	No	No	No	No		No
	AB	12	Cameron Hodge	1	0	1	2	Scary how many of you dimtwits would happily see huge swaths of the population still being wiped out by polio and small pox. You're not a doctor because you read some internet conspiracies once, but nice try Jenny McCarthy…	Positive	No	No	No	No	No		No
	AB	12	Flash_Bazbo	1	0	2	3	And we know that it's aliens that are forcing us to put fluoride in the water, and any dentist that supports fluoride is obviously an alien. Man, you conspiracy people are nuttier that squirrel poop.	Positive	No	No	No	No	No		No
	AB	12	observer53	1	0	1	4	Unless the vaccine only works if administered in a school this was more about HPV Calgary bullying the CSB to get their way than it was about health care. The program could just as easily been run at community centres or malls, some girls probably spend more time in the malls than the schools anyway.	Negative	No	No	No	No	No	1	No
	AB	12	ihgfedcba	1	0	27	62	As in the past, vaccines works best with mass vaccinations and the best way to reach the highest population numbers are in school programs that already exist.	Positive	No	No	No	No	No		Yes
	AB	12	justsayno	0	0	35	52	MERCK SHILL!	Negative	No	No	No	No	No		Yes
	AB	12	calgaryoverrated	1	0	13	14	Cervarix (HPV2) Manufacturer: GlaxoSmithKline.... Gardasil is his product but Cervatix is NOT! So dont use Gardasil and your fear of Shill is over.	Positive	No	No	No	No	No		Yes
	AB	12	Rosehawk1	0	0	16	17	4 yrs ago I talked to our good Bishop to change his mind about the ban. He told me that I was an "unfortunate casualty". Next I want to the trustees who surprised me by saying they believed in the vaccine but had to vote against it because Bishop Henry threatened to pull his support starting by pulling the priests out of the schools. HPV Calgary started later. It was the Bishop that did the bully…	Positive	No	No	Yes	No	No	2	No
	AB	12	justsayno	0	0	36	52	What a shock that HPV Calgary is financed by Merck and what a freaking bunch of bullies they are. When this vaccine became available Merck started paying their "unbiased" doctors to send letters to editors telling us how wonderful this vaccine was. Yes we had quite an exchange of emails, Sheila Murphy and I, when I told her direct marketing of drugs was not allowed in Canada. Now they started HPV…	Negative	No	No	No	No	No		Yes
	AB	12	NTM	1	0	1	2	When will the time come to abolish the Catholic School System and remove the religious aspect. I say this only for the cost and streamlining of the system. This HPV debate happened in both systems and truly shows what a waste it is to have both boards. There are more than enough private schools for those who need to have specific things taught and the saving would be massive if only one public sc…	Positive	No	No	No	No	No		No
	AB	12	Wiser10	3	3	1	2	About time wisdom prevailed over ignorance!	Positive	No	No	No	No	No		No
	AB	12	RValois1	4	6	2	6	the fear of lawsuits and the loss off money's has changed the Biship's mind - funny how money will motivate the catholic church??? this is a good thing for our children - horray	Positive	No	No	No	No	No		No
	AB	12	justsayno	0	0	37	52	As the sheeple line up for their shot...	Negative	No	No	No	No	No		Yes
	AB	12	ihgfedcba	0	0	28	62	Healthy sheeple lining up while the unhealthy sheeple fill up our hospital beds.	Positive	No	No	No	No	No		Yes
	AB	12	peeps14	0	0	1	1	Whoever argues that Small pox vaccine success means all vaccinee are good and no grounds to stand on.. Great argument. Big Pharma is a joke. Any CEO of any buisness number one goal is to maximize profits. To make more then the previous quarter. Cancer is a 16 trillion dollar per year buisness. To cure cancer would crush their stock.They brain storm on how to make money. They represent their share…	Negative	No	No	No	No	No	1	No
	AB	12	ihgfedcba	0	0	29	62	Depression costs society untold amounts. A cure for depression would probably bring those car accidents numbers down too. Bring on the depression vaccine!	Positive	No	No	No	No	No		Yes
	AB	12	guest 2	0	0	1	1	Big Pharma is a joke. Yes Certain vacinne is the past have proven to be detrimental for society. That doesn't mean they are all good. Number one Goal of any CEO is to maximize profit. Cancer is a 16 tillion dollar industry. They represent their share holders. To cure cancer would crush that stock. Vacinne are another money grab. 55 vacinnes by the time the child is 5 years old. By the way. Big Ph…	Negative	No	No	No	No	No		No
	AB	12	Rosehawk1	0	0	17	17	No one ever said the vaccine should be mandatory, just offered in schools here in Calgary as in the rest of the country. The decision should always made by the parent.	Positive	No	No	No	No	No	2	No
http://www.calgarysun.com/2012/10/25/calgary-bishop-fred-henry-backs-policy-review-for-hpv-vaccinations-in-separate-schools	AB	13	Pnyx	7	0	1	3	Just as humanity climbs out of the Dark Ages pit, the Dark Monsters battle to drag her back in.	Positive	No	No	No	No	No		No
	AB	13	Guest 1	3	0	1	1	careful Pnyx, magicke skyman might hear you..	Neutral	No	No	No	No	No		No
	AB	13	b3n_34y3ars	1	0	1	23	"Yes, the health risk for girls is unquestioned" So was thalidomide and diethylstilbestrol (DES)	Negative	No	No	No	Yes	No		Yes
	AB	13	harcur	3	0	1	24	If you want to live in yesterland I have some polio for you to pass around.	Positive	No	No	No	No	No		No
	AB	13	b3n_34y3ars	0	0	2	23	obviously you know nothing about DES	Negative	No	No	No	Yes	No		Yes
	AB	13	Scott1945	0	0	1	20	So we should stop using all medications and vaccines, then? You left out lobotomies and blood letting.	Positive	No	No	No	No	No		No
	AB	13	b3n_34y3ars	0	0	3	23	I feel bad for people who don't read well and can't comprehend either. Hope your next lobotomy helps increase your brain cell numbers.	Negative	No	No	No	Yes	No		Yes
	AB	13	Scott1945	0	0	2	20	Like I've said, dumb people shouldn't be allowed to breed. Thanks for providing, yet another example of that.	Positive	No	No	No	No	No		No
	AB	13	b3n_34y3ars	0	0	4	23	Trolling for attention....must be tough being a nobody.	Negative	No	No	No	Yes	No		Yes
	AB	13	Scott1945	0	0	3	20	It's sad, that all you are left with is petty insults, when you are stumped to answer the question. Do humanity a favour and don't procreate, please.	Positive	No	No	No	No	No		No
	AB	13	ihgfedcba	1	0	30	62	You have a good point. This is why in 2012 labs use mice and pigs and not pregnant women.	Positive	No	No	No	No	No		Yes
	AB	13	b3n_34y3ars	0	0	5	23	do yourself a favour and read about thalidomide and especially DES. and keep believing everything the drug companies tell you. Where's the long term study on HPV?...there is none. They rushed to market without a long term study....at $350 a vaccine. Wonder if that's why they want everyone to have the vaccine?	Negative	No	No	No	Yes	No		Yes
	AB	13	ihgfedcba	0	0	31	62	I do read. I researched all there was to know about HPV and the vaccine even all the conspiracy tin foil hatters sites and came to an informed decision to sign the consent form. Yes big pharma makes money. So does big oil and big banks and big technology whats your point?	Positive	No	No	No	No	No		Yes
	AB	13	b3n_34y3ars	0	0	6	23	Well you came to a decision about getting a HP vaccine. I did too.My decision was to say no. I noticed you said nothing of the fact that this vaccine was rushed to market after a 27 month study and without long-range studies as they do with any other health procedure. No one knows what effect it will have on the children born to those who take the HPV or what health effects will occur later to th…	Negative	No	No	No	Yes	No	1	Yes
	AB	13	ihgfedcba	0	0	32	62	Your choice. The Catholic parents ought to be able to make that yes or no choice too, right now they have no choice. My daughter did have a say in the decision too. Even though she hates needles, her choice was yes to the HPV needle. Claiming that big pharma is making big money off of the vaccine, when the real truth is a vaccine is not money making in the long run. If they could roll in the mool…	Positive	No	No	No	No	No	2	Yes
	AB	13	b3n_34y3ars	0	0	7	23	Catholic parents don't have a choice? Sure they do. The question is about allowing the HPV to be given in sepate schools. Catholic parents can go to a health clinc and get the vaccine. I bet if you asked your daughter if she wanted to go see Justin Beiber in Disneyland she would say yes too. Still haven't any word from you as to why the long term study wasn't done on HPV like other drugs,and was …	Negative	No	No	No	Yes	No		Yes
	AB	13	ihgfedcba	0	0	33	62	To answer your question below, I do not believe in anti vax conspiracy propaganda. I am satisfied with the medical research and the results. You are right Catholic parents do have a choice to go to a medical institution and pay for it, and no choice for their child to receive at school for free. Any disease that can be eliminated or greatly reduced through vaccines is a good thing. ps daughter is…	Positive	No	No	No	No	No		Yes
	AB	13	harcur	14	0	2	24	Hey guess what Johnny, your beloved bishop is changing his religious teaching because he is afraid of lawsuites. A true believer he is eh. Why can't the Catholic church protect him? I'll tell ya why. They phoned him up and said,''We cannot afford anymore lawsuites after the pedophile priest debacle so we suggest you go along to get along and shove your morality up your...We don't believe in that …	Positive	No	No	No	No	No		No
	AB	13	Guest 2	1	0	1	1	A bloody +. well said	Positive	No	No	No	No	No		No
	AB	13	ricksanders	8	0	1	1	they do need it. I came from a small town by drumheller. And if you were interested in a roll in the hay you always went for the Roman Catholic girls. Their parents all figured that because they went to church on sunday that they were little angels.lol They were all nymphomaniacs.	Neutral	No	No	No	No	No		No
	AB	13	likeableguy32	10	0	1	1	I was raised in the Catholic School system and since I know there was a few you had better luck at the public system. So your full of BS.	Neutral	No	No	No	No	No		No
	AB	13	Scott1945	1	0	4	20	Same here. There were "good" Catholic girls and then there were, "GOOD" Catholic girls.	Positive	No	No	No	No	No		No
	AB	13	Guest 3	1	0	1	1	i ran a bit hot back in the day myself, and i can tell you that catholic girls and mormon girls taught me things that would make a sailor blush.	Neutral	No	No	No	No	No		No
	AB	13	Scott1945	1	0	5	20	They did things you wouldn't ask from a professional.	Positive	No	No	No	No	No		No
	AB	13	Guest 4	1	0	1	1	man i miss those days..	Neutral	No	No	No	No	No		No
	AB	13	Guest 5	1	0	1	1	why not? they figured they'd just confess before the final bell and all was good in heaven.	Neutral	No	No	No	No	No		No
	AB	13	Johnny English	16	0	1	1	Well I don't know what part you chose to read and what part you didn't Bishop Henry stated "Although I support the current policy, the don't provide it in school policy because it's contrary to what is taught in the Church. All he is doing is supporting the Board of Trustee's request to reviewing the policy. Bishop Henry also denied ever linking vaccinations to increased sexual activity, saying i…	Negative	No	No	No	Yes	No		Yes
	AB	13	Julio P	16	0	1	3	Those people threatening the law suit saying they don't have enough money to administer the vaccine so it's cheaper to forcibly use someone buildings. So there going to raise money to sue the Catholic School board. Knowing how over priced the lawyers are it would be much cheaper to raise money to rent a building where parents can readily bring their kids to get the untested, unproven Vaccine that…	Negative	No	No	No	Yes	Yes		Yes
	AB	13	harcur	5	0	3	24	You seem to have her life already planned '' Cradle to Grave ''. I feel sorry for her, going through life as an adult and not being able to make her own desisions after she is out of school.	Positive	No	No	No	No	No		No
	AB	13	ihgfedcba	0	0	34	62	If a child has to wait until she is out of school and on her own she will not know how and will need the government to do her thinking for her.	Positive	No	No	No	No	No		Yes
	AB	13	Martin Wilson	5	0	1	42	Perhaps you should veto blood transfusions and vaccinations for polio as well.	Positive	No	No	No	No	No		No
	AB	13	Scott1945	0	0	6	20	What if she is gay?	Positive	No	No	No	No	No		No
	AB	13	Julio P	1	0	2	3	Sorry she my Daughter not yours so she is straight.	Negative	No	No	No	Yes	Yes		Yes
	AB	13	Scott1945	1	0	7	20	In reply to your comment, "Sorry she my Daughter not yours so she is striaght." Wow. Keep hoping!	Positive	No	No	No	No	No		No
	AB	13	Guest 6	2	0	1	1	lol.. i can't help but kinda hope that kid turns out to be the butchest lesbian since Rosie the Riveter...	Neutral	No	No	No	No	No		No
	AB	13	Guest 7	0	0	1	1	"when she goes to get married her and her future hubby will get all required medical tests and if he turns out to be HPV positive he will have to get the required medical treatments." could be too late by then. ..and what makes you think that your daughter will take direction from you in matters of sexuality, marriage and medical follow-up?	Positive	No	No	No	No	No		No
	AB	13	416elenorRIGBYjustactingCASULL	1	0	3	8	If she is smart, she has gone to Safeway Pharmacy and gotten the shot already.	Positive	No	No	No	No	No		No
	AB	13	Guest 8	0	0	1	1	If you think your daughter is going to save herself for marriage you need a reality check. If you don't allow her to get this PROVEN vaccine you're doing more harm than good. She's a catholic school girl....c'mon, that's the stuff porn is written for. She'll be getting filled out like an application by both men and women and you'll be in your dreamworldcwhere you think your little princess is an …	Positive	No	No	No	No	No		No
	AB	13	jghsupertester	3	0	1	1	wonder how strong your beliefs will be when your daughter dies of a preventable disease	Positive	No	No	No	No	No		No
	AB	13	harcur	1	0	4	24	Go ahead john,thats your right not to have your child vaccinated. Why would you be against other people having thier children vaccinated in a convenient classroom at the school? Or are you? Any school anywhere in Alberta has to have parental permission to vaccinate for anything. Not trying to be an english teacher but it is '' a lot '' I appreciate it when people correct my spelling,I know its no…	Positive	No	No	No	No	No		No
	AB	13	Scott1945	1	0	8	20	I have a theory, that allowing dumb people to breed, will doom humanity. Seems to be going that way....	Positive	No	No	No	No	No		No
	AB	13	scottsatrollingrat	0	0	1	11	you need help	Neutral	No	No	No	No	No		No
	AB	13	Scott1945	1	0	9	20	Learn English, homo'd.	Positive	No	No	No	No	No		No
	AB	13	Martin Wilson	1	0	2	42	I agree. Letting stupid people breed makes as little sense as letting them vote.	Positive	No	No	No	No	No		No
	AB	13	Scott1945	0	0	10	20	With the way elections have been going, there seems to be a small flaw in the democratic process. "The majority rules", is a great idea, but what if the majority are stupid?	Positive	No	No	No	No	No		No
	AB	13	Martin Wilson	3	0	3	42	Perfect! Another voice from the dark ages. Perhaps you should check to see what the Easter Bunny or Santa Claus think about modern medical procedures. Then we will have a concensus of all the make believe authorities.	Positive	No	No	No	No	No		No
	AB	13	Stiriling8	0	0	1	8	Memo to Martin. ... Doctors KILL People everyday! !!.... We are sorry. .. They were Ill We tried everything. .. Except the Competence of the DOCTOR was last Checked and Tested. .... WHEN ??	Negative	No	No	No	Yes	No		No
	AB	13	Scott1945	3	0	11	20	You think the schools are administering the vaccines without parental consent? Wow. I weep for the future of humanity.	Positive	No	No	No	No	No		No
	AB	13	scottsatrollingrat	0	0	2	11	nobody cares what you say	Neutral	No	No	No	No	No		No
	AB	13	kromane	2	0	1	8	Go away Troll	Neutral	No	No	No	No	No		No
	AB	13	Scott1945	2	0	12	20	Learn English, homo'd.	Positive	No	No	No	No	No		No
	AB	13	scottsatrollingrat	0	0	3	11	You people with Kids in this or any other private school shouldn't be given any finacial help. You want to set your own agenda then pay your own way	Neutral	No	No	No	No	No		No
	AB	13	kromane	1	0	2	8	Go away Troll	Neutral	No	No	No	No	No		No
	AB	13	Scott1945	1	0	13	20	Learn English, homo'd.	Positive	No	No	No	No	No		No
	AB	13	Auswop	8	0	1	1	So Bishop Henry......what about the girl that saves herself for marriage and her husband has the HPV virus and gives it to her and she ends up with cancer. My doctor was telling me that in Australia they have decided to give the vaccine to both the males and females in the schools. This way, the males can't pass it along to the girls that haven't had the vaccine. I'm going to get both my son and …	Positive	No	No	No	No	No	2	Yes
	AB	13	girlposter	1	0	1	3	good for you, obviously you love your children and can think for yourself	Positive	No	No	No	No	No		No
	AB	13	mgrinas	8	0	1	2	This old fart should have nothing to say about health matters, HE IS NOT A DOCTOR. Why do Catholics follow the words of someone that has NO medical background? Use common sense. Get medical opinions.	Positive	No	No	No	No	No		No
	AB	13	Martin Wilson	1	0	4	42	Well said.	Positive	No	No	No	No	No		No
	AB	13	Scott1945	2	0	14	20	Common sense, isn't that common anymore.	Positive	No	No	No	No	No		No
	AB	13	scottsatrollingrat	0	0	4	11	shut up Kromane	Neutral	No	No	No	No	No		No
	AB	13	Scott1945	1	0	15	20	Learn English, homo'd.	Positive	No	No	No	No	No		No
	AB	13	kromane	0	0	3	8	Go away Troll P.S. I will continue untile you go away	Neutral	No	No	No	No	No		No
	AB	13	girlposter	0	0	2	3	has he ever fathered children etc or felt the agony of death of someone where it could have been prevented by a vaccine? just because the parts involved are in the sexual makeup of a woman and the disease is spread by sexual contact consensual or not it is a big no no to him. If it had to do with the males in this religion, it would be interesting to see what his actions would be .........	Positive	No	No	No	No	No		No
	AB	13	sixtieshippie	0	0	1	3	The only thing he will father are will knots. Little balls of s#$t that hang off the hairs of the a@@es he abuses	Neutral	No	No	No	No	No		No
	AB	13	Stiriling8	0	0	2	8	Wake up.... DOCTORS KILL People Everyday	Negative	No	No	No	Yes	No		No
	AB	13	scottsatrollingrat	0	0	5	11	we shouldn't be funding these training schools for Catholic or any other private schools . they have a choice to be in public schools	Neutral	No	No	No	No	No		No
	AB	13	Scott1945	1	0	16	20	Learn English, homo'd.	Positive	No	No	No	No	No		No
	AB	13	kromane	1	0	4	8	Go away Troll	Neutral	No	No	No	No	No		No
	AB	13	Stiriling8	0	0	3	8	Actually Your Taxed School funds can be directed as you wish	Negative	No	No	No	Yes	No		No
	AB	13	guest 9	2	0	1	1	"And Henry also denied ever linking vaccinations to increased sexual activity, saying instead that the practice muddies the focus on morally-based prevention." well the good bishop might just have what it takes to work for the Redford government, no?	Positive	No	No	No	No	No		No
	AB	13	scottsatrollingrat	0	0	6	11	WRP allready has one of these people , Does Henry hate women like Romney?	Neutral	No	No	No	No	No		No
	AB	13	Scott1945	1	0	17	20	Learn English, homo'd.	Positive	No	No	No	No	No		No
	AB	13	kromane	1	0	5	8	Go away Troll	Neutral	No	No	No	No	No		No
	AB	13	Guest 10	3	0	1	1	..hang on, i'll ask… yes, yes he does.	Neutral	No	No	No	No	No		No
	AB	13	Stiriling8	0	0	4	8	The Circus is traveling with homeward	Negative	No	No	No	Yes	No		No
	AB	13	Fernando Cortes	1	0	1	1	I agree 100% with the bishop and with all people who are against this vaccination program but besides that take a look of what kind of studies are backing up this vaccine, as must of the medicines, vaccines just are a lucrative business for the pharmaceutical industry (Cartel?). Do you remember all that show about the avian flu, I have friend who got the vaccine and were sick after that. Don't be…	Negative	No	No	Yes	No	No	1	No
	AB	13	Pnyx	2	0	3	3	So, let me get this straight. Your friend getting sick invalidates the whole immunization concept and process? Fine. Just be careful planning any long trips, you might fall off the edge of the world.	Positive	No	No	No	No	No		No
	AB	13	Stiriling8	0	0	5	8	People Everyday are Lemmings to voluntarily Accept everything from the Medical Complex	Negative	No	No	No	Yes	No		No
	AB	13	ihgfedcba	0	0	35	62	Bishop Henry has regained my respect.	Positive	No	No	No	No	No		Yes
	AB	13	Pnyx	0	0	3	3	I'm sure that he's very happy about that.	Positive	No	No	No	No	No		No
	AB	13	ihgfedcba	0	0	36	62	I be blessed.	Positive	No	No	No	No	No		Yes
	AB	13	sixtieshippie	0	0	2	3	Keep your little boys away from him	Neutral	No	No	No	No	No		No
	AB	13	JustSayin59	1	0	1	1	Bottom line ............ if you want your daughter to get the vaccine, go get it. Just because it isn't offered at the school level, it doesn't mean you can't have it administrered. If your daughter wants to get a body piercing, go get it. Just because it isn't offered at school, it doesn't mean she can't have one. The list goes on!	Negative	No	No	No	No	No		No
	AB	13	416elenorRIGBYjustactingCASULL	0	0	4	8	Every Safeway Pharmacy in town. It isn't difficult or even out of their way, just walk in and see the Pharmacist, she'll be done before they finnish cruising the frozen food aisle	Positive	No	No	No	No	No		No
	AB	13	caribbean3	3	0	1	2	Why in 2012 would anyone follow the instructions of a representative of an institution that allowed some priests and nuns to molest young children for years and cover it up? You are parents, make your own educated decision rather than follow the word of this backward institution.	Neutral	No	No	No	No	No		No
	AB	13	b3n_34y3ars	0	0	8	23	I guess we can say the same for hockey coaches,scouts leaders,teachers,policemen ect., Why follow these individuals in an institution that allows people to molest children for years and cover it up? I guess according to your wisdom,the NHL,Scouts Canada,Police forces everywhere,and educational institutions are all backward institutions.	Negative	No	No	No	Yes	No		Yes
	AB	13	Stiriling8	0	0	6	8	Rather Intolerant. .. DO You Generalize about all Groups	Negative	No	No	No	Yes	No		No
	AB	13	sixtieshippie	0	0	3	3	Wow he backs vaccines and the catholic church backs pedophile preachers as well His word mus t be golden.	Neutral	No	No	No	No	No		No
	AB	13	b3n_34y3ars	0	0	9	23	congratulations! you've been selected the winner of ass troll of the day.	Negative	No	No	No	Yes	No		Yes
	AB	13	Stiriling8	0	0	7	8	These are Humans and are Fallable	Negative	No	No	No	Yes	No		No
	AB	13	justsayno	0	0	38	52	"And Mitchell said Henry should note that evidence of the vaccine’s merits has grown much stronger over time." Where the hell is the evidence for this statement? Other than the studies done by Merck (the manufacturer), HPV Canada (who is fully funded by Merck) and doctors paid by Merck and scientists paid by Merck. No one else is saying this vaccine has any merits	Negative	No	No	No	No	No	1	Yes
	AB	13	justsayno	0	0	39	52	If this vaccine curtails the breeding like rabbits antics of the Catholics, I'm all for it. I'm hoping the Polysorbate 80 kicks in and makes them all infertile.	Negative	No	No	No	No	No		Yes
	AB	13	Stiriling8	0	0	8	8	Wow. .. Stop lining up as Lemmings to voluntarily have a Poison injected into Yourself	Negative	No	No	No	Yes	No		No
http://www.calgarysun.com/2012/09/13/hpv-crusaders-set-to-sue-calgarys-catholic-school-board-over-anti-vaccination-stance	AB	14	ScottSOT	22	0	1	11	OK folks, this is probably simpler than you might think. (Let's all take a deep breath and give this difficult question some serious time and thought). Who is most responsible and ultimately held accountable for a child's health and safety? That would be the parent or guardian. Definitely not a School Board, a Bishop, a HPV Crusader or a Policy Statement and most certainly not someone from within…	Negative	No	No	No	Yes	No	1	No
	AB	14	CanadaDan	8	0	1	2	Wrong! This is a serious health issue. What if people or the church had the same view on the small pox vaccine or the polio vaccine or the TB vaccine? Because of mass immunization the virus got petty well wiped out. They got a good case against the school board.	Positive	No	No	No	No	No		No
	AB	14	ScottSOT	1	0	2	11	Lets see, comparing communicable deseases to a STD. No Dan, you're wrong on this one.	Negative	No	No	No	Yes	No		No
	AB	14	CanadaDan	6	0	2	2	Wrong again! This is a cancer causing disease and do you think all the girls turning into womanhood will be nuns and never have sex? Do you think all teenage girls should be subject to this because mommy says no sex while you are under 18? How many of these girls would go out of their way to get the shot just before they marry?	Positive	No	No	No	No	No		No
	AB	14	ScottSOT	2	0	3	11	So Dan, because I am a Doctor and I advise (demand) that you have your child take a vaccine you would automatically honor my request, simply based on my say so and knowledge? I doubt it Dan. The point isn't about whether the STD is potentially cancer, the point is; "Who has the right to dictate whether a child receives a vaccine". So tell me Dan, how do you plan on reaching home schoolers and pri…	Negative	No	No	No	Yes	No	1	No
	AB	14	JoeBlow4444	1	0	2	8	Wow, way to show your ignorance on the issue. HPV is not a sexually transmitted disease, it is a form of cancer that it just so happens sexually active women have a better chance of getting. The Catholic Church's stance on this makes no sense. They might as well say "don't let teens have beds, it will lead to sexual activity". All this is is Bishop Henry trying to move further up the ladder withi…	Positive	No	No	No	No	No	2	No
	AB	14	ScottSOT	2	0	4	11	OK I'll refer to it as SAD. Sexually Active Desease if that makes you feel better. Who gives a rip if Bishop Henry does not endorse it. If the damn parent wants their daughter to have the vaccine so badly go get the damn vaccine! Just not available at the Catholic School. Man . . . . Im sure that will really help Henry move up the Bishop ladder of Distinction! And you tell me I'm ignorant?	Negative	No	No	No	Yes	No		No
	AB	14	JTfromcalab	0	0	1	6	Joeblow444: HPV = Genital human papillomavirus (also called HPV) is the most common sexually transmitted infection (STI). There are more than 40 HPV types that can infect the genital areas of males and females. These HPV types can also infect the mouth and throat. Most people who become infected with HPV do not even know they have it. This is directly from http://www.cdc.gov/std/hpv/std... The CD…	Neutral	Yes	No	No	No	No		No
	AB	14	JohnathanGalt	21	0	10	37	No one is stopping parents who wish to experiment on their daughters with unproven vaccines. They just can't do it on school property. There are lots of other places to inject your children with toxic chemicals whose main function is to make big pharmaceutical firms lots of money.	Negative	No	No	No	No	No		No
	AB	14	JR	8	0	1	1	Finally a comment with sense on here, I think people need to understand the serious health risks of this "vaccine" , yes mothers, want grand kids? don't sterilize your daughters, do your research!!!	Negative	No	No	No	No	No		No
	AB	14	Sincfiles	0	0	1	1	Finally, some common sense.	Negative	No	No	No	No	No		No
	AB	14	ihgfedcba	1	0	37	62	The vaccine has enough prove for me. The toxins associated in making the vaccine is minimal and is easily handling by the human body. There is more toxins in a frozen pizza than a vaccine. I do agree big pharma makes a big money, this big money also goes back into research. So if big pharma comes out with a vaccines for cancer or aids or rhinopharyngitis would you be accusing them of making money…	Positive	No	No	No	No	No	2	Yes
	AB	14	JohnathanGalt	4	0	11	37	You are free to use whatever products you choose. You are not free to impose (by force) your choices on anyone else. The Catholics don't want the vaccine being used on their property, so you need to find somewhere else to use it. I think that the real issue is that people don't want to be accountable for their own decisions. They don't mind taking a risk that the vaccine may be harmful in the lon…	Negative	No	No	No	No	No	1	No
	AB	14	SuperLogic	10	0	1	23	You are wrong Dan on several accounts! First, the disease is entirely preventable, as it is a result of an action. Second, it's not up to some unelected board to dictate and over ride parents rights to the well being of their children. Third even if it prevents HPV, it does not prevent a host of other STD's including AIDS which can also kill. Fourth there is nothing preventing people from getting…	Negative	No	No	No	No	Yes		No
	AB	14	Guest 1	3	0	1	6	"Even if it prevents HPV, it does not prevent a host of other STD's including AIDS which can also kill" Are you serous? That's an argument? It doesn't prevent AIDS so don't get vaccinated? Just let the scientists do their job so your sutty daughter doesn't get cancer, okay? BTW, AIDS isn't a death sentence anymore. Not curable, but manageable.	Positive	No	No	No	No	No		No
	AB	14	SuperLogic	0	0	2	23	Yes, moobys37, that is an argument, since you can't figure it out. Because even if it prevents one STD, there are a multitude of other STD's that they are exposed to. You are still putting them at risk! And AIDS still can be a death sentence, and it's definitely not something that is pleasant to live with. I think you should worry about your own s1utty wife and daughters, as unlike me you seem to…	Negative	No	No	No	No	Yes		No
	AB	14	Guest 1	1	0	2	6	..it also won't prevent car accidents, stock market crashes, premature ejaculation or another season of the bachelor, but so what? would you deny, say, chemotherapy because it won't treat your cancer AND your receding hairline! ..you normally display much better logic, at least. this time, your brand loyalty is clouding your sensibilities..	Positive	No	No	No	No	No		No
	AB	14	SuperLogic	0	0	3	23	So, if a car is prone to crash because it has faulty brakes, faulty steering, faulty emergency brake, you continue to drive it the way you did because you replaced the bald tires? My logic is just fine thank you,.... yours needs a bit of work though.	Negative	No	No	No	No	Yes		No
	AB	14	Guest 1	0	0	3	6	?? you lost me with the car bit.. my logic's sound. you don't deny girls a proven medicine just to advance a theology and its shaky speculations.	Positive	No	No	No	No	No		No
	AB	14	SuperLogic	0	0	4	23	Yeah, it doesn't surprise me that you can't follow the analogy. Let me try to simplify it for you.... if you cure one STD but theres still dozens more out there, including ones that can kill, and others that can cause many other ailments including the ability to have kids, do you fix one and pretend like everythings ok? Or do you look at the big picture and realize that it is just a band aid solu…	Negative	No	No	No	No	Yes		No
	AB	14	Guest 1	0	0	4	6	why wouldn't you treat for the most common and pervasive of the bunch?	Positive	No	No	No	No	No		No
	AB	14	SuperLogic	0	0	5	23	I wouldn't give them chemo if they didn't have cancer.... and I wouldn't give them chemo, and then put them in a position where they are at risk to get AIDS, or other STD's, which is what you are doing. My logic is just fine, you're the one that's trying to treat one symptom and bury your head in the sand and avoid dealing with reality, and pretend that everything is just fine. Try looking past t…	Negative	No	No	No	No	Yes		No
	AB	14	Guest 1	0	0	5	6	lol..i'm the last person to think everything's just fine. in fact, i think humanity is going to hell in a handbasket. nice talking to you, flat-earther.	Positive	No	No	No	No	No		No
	AB	14	Guest 1	0	0	6	6	so to be clear: you think treating to prevent one STD 'puts them into position to get AIDS' ? that's a helluva an assumption there. i know you think you are very logical, but that honestly, is an insane and unvalidated presumption you just made there. ..totally without merit.. FAIL.	Positive	No	No	No	No	No		No
	AB	14	Anne2005	1	0	1	2	This is a serious health issue, absolutely! And I definitely agree with you about the importance of vaccines. My children's vaccinations have always been current and will continue to be. That being said, ultimately the decision to vaccinate lies with the parents. Even in public schools, where vaccinations are done, parents are able to excuse their child for personal or religious beliefs. Right or…	Positive	No	No	No	Yes	No	2	Yes
	AB	14	ScottSOT	0	0	5	11	DAN you keep missing the point. If the parents wish to have there children vaccinated they can get vaccinated. If the school's view is to not permit Health Services using the school as a central location for children to obtain the vaccination, it is their right and their choice. In addition, you persist in comparing this form of cancer to communicable deseases which it is not.	Negative	No	No	No	Yes	No		No
	AB	14	Rapiscrap	34	0	1	1	Ummmm......sorry to tell you this but your Catholic kids are already promiscuous.....no different than any other teenagers. Hiding behind the cloak of Catholicism doesn't make your kids less sexually active. If you believe this, you're living in Disneyland. Parents ultimately need to decide whether or not the vaccine is administered, not some school board and certainly not Bishop Henry.	Neutral	No	No	No	No	No		No
	AB	14	ScottSOT	1	0	6	11	Thank you!	Negative	No	No	No	Yes	No		No
	AB	14	SuperLogic	6	0	6	23	And certainly not some unelected, unaccountable board! :oP	Negative	No	No	No	No	Yes		No
	AB	14	JoeBlow4444	9	0	3	8	Exactly. Why do you think RHCP wrote a song called Catholic School Girls Rule. And to all you parents with blinders on, no, it is not about them being good upstanding girls ; )	Positive	No	No	No	No	No		No
	AB	14	Ram Rod	1	0	1	1	Yes, about the shot thing boys. The Bishop never said that parents couldn't do the shots, he left it up to them. It's just not going to happen on school property. No biggy. As far as how moral anyone of those catholic girls are, it's really just your opinion and really you don't know. Are there some stinkers in the lot, I'm pretty dam sure there are. But it would be interesting to measure the mor…	Neutral	No	No	No	Yes	Yes		No
	AB	14	Pshyeah	6	0	1	1	I don't think it's the job of schools regardless of public/separate systems. Even Catholic parents are taking their kids to get immunized, it would just be more convenient if it was allowed in the separate system - and all Catholics are fighting for it except for that dinosaur of a Bishop.	Positive	No	No	No	No	No	2	No
	AB	14	don anderson	1	0	1	3	What evidence do you have that all Catholics are fighting for it?	Neutral	No	No	No	No	No		No
	AB	14	JTfromcalab	5	0	2	6	The school board is not prohibiting the girls from getting the vaccine, they're just not providing a place on their property for it to be done. This "advocacy group" would be further ahead if they raised money to rent space in the public schools where the girls could go to get the vaccine, rather than wasting people's and court's time with another law suit. Rather than fighting to force a group t…	Neutral	No	No	No	No	No		No
	AB	14	ljs60	0	0	1	2	Sounds to logical.	Neutral	No	No	No	No	No		No
	AB	14	don anderson	0	0	2	3	I am sure that other ways already exist.	Neutral	No	No	No	No	No		No
	AB	14	justsayno	0	0	40	52	I'm sure they will since the advocacy group is well funded by Merck. Since 90% of women are able to fight off this virus naturally within two years and by Health Canada's own admission that if caught early enough, it can be cured, what is the big deal about this vaccine anyway?	Negative	No	No	No	No	No		Yes
	AB	14	justsayno	3	0	41	52	And certainly not a pharmaceutical company (HPV Calgary = Merck) gets to dictate what has to be put into our young children's bodies. Gardisil contains polysorbate 80 which causes infertility in rats.	Negative	No	No	No	No	No	1	Yes
	AB	14	StevenAspenlieder	0	0	1	5	WRONG. Catbolics are all fit well adjusted happily married drug free law abiding people who dont even get parking tickets. And all their teenage children who wait until their mid twenties and after college before they even have their first kiss. Next up, hoa to walk on water, part the red sea, and return from the dead.	Positive	No	No	No	No	No		No
	AB	14	Doug Thompkins	2	0	1	2	The doctors are the experts in this stuFF....... stop being political with people's health matters you cultist fOOLZ........	Positive	No	No	No	No	No		No
	AB	14	ScottSOT	1	0	7	11	Oh you mean like the same ones who predicted the world was coming to an end with H1N1?	Negative	No	No	No	Yes	No	1	No
	AB	14	Doug Thompkins	1	0	2	2	a end? RuBBiSH........	Positive	No	No	No	No	No		No
	AB	14	Guest 2	0	0	1	1	clearly not, because no doctors ever said that. you can't employ such strong hyperbole and expect to be taken seriously.	Positive	No	No	No	No	No		No
	AB	14	ihgfedcba	0	0	38	62	It was the media who told us we would all die if we did not get the vaccine.	Positive	No	No	No	No	No		Yes
	AB	14	Caperj	2	0	2	2	Religion should not dictate public safety PERIOD. No one Bishop or person should be able to dictate there beliefs to a society based on their beliefs. SCIENCE has proven this will reduce risk. Religion to date has not proven otherwise. It's time for the catholic religion to revolve or disappear.	Positive	No	No	No	No	No		No
	AB	14	SuperLogic	6	0	7	23	If people actually followed the teachings of the church, there would be no STD's, no AIDS, no teen pregnancies, no abortions..... what was that you were saying about religion not reducing risks?? (And it's EVOLVE, not REVOLVE. DOH!!)	Negative	No	No	No	No	Yes		No
	AB	14	JoeBlow4444	2	0	4	8	True, and there would also be no lying, cheating, murder, blasphemy, etc. Have you never used the lord's name in vain? Have you never lied? Have you never disobeyed your parents, even a little bit? If so, then you must be Jesus. If not, then as the bible says, let he who is without sin cast the first stone. The problem with a lot of Catholics is their hipocrisy. They pick and choose what they wan…	Positive	No	No	No	No	No		No
	AB	14	SuperLogic	1	0	8	23	And your point is, that because no one is perfect that no one can oppose anything?? So, then why you opposing me?? Because someone has lied, can they still not be against lying? Or slander? Because someone has hated, they can't be against hate? Or murder? I'm sure you have done your fair share of things that you oppose too,... so that would make you a hypocrite as well! Have you lied? But I bet y…	Negative	No	No	No	No	Yes		No
	AB	14	Guest 3	0	0	1	10	your theory suggests that STD's (viruses and bacteria) only exist due to irreligious behaviour. that's insane. most STD's predate humanity for crying out loud. ..you don't actually believe that, say the clap, was spontaneously generated when ancient humans had an ungodly tryst, do you? declare yourself!..	Positive	No	No	No	No	No		No
	AB	14	SuperLogic	2	0	9	23	Well, I would take it we are talking about STD's amongst humans, so how can STD's predate humanity?? And then how would these STD's been passed on to humans, but through human to animal contact?? The reality is, if you had sex between one woman and one man confined to marriage, there would be ZERO STD's! Explain to me how this statement is flawed?	Negative	No	No	No	No	Yes		No
	AB	14	Guest 3	0	0	2	10	"The reality is, if you had sex between one woman and one man confined to marriage, there would be ZERO STD's! Explain to me how this statement is flawed?" sure, with one simple question: where did the STD come from?	Positive	No	No	No	No	No		No
	AB	14	SuperLogic	0	0	10	23	That doesn't answer the question at all. The question should be, how do you prevent STD's from spreading? Simple answer, sexual fidelity! Or, why are the STD rates skyrocketing?? (Now at approx 25% of youth) Hint: Promiscuity	Negative	No	No	No	No	Yes		No
	AB	14	Guest 3	0	0	3	10	gawd you're slow.. the nicest, sweetest christian girl could get infected my a man, after marriage, because he was harboring the disease unknowingly. holy moly. not the sharpest tool, are you?	Positive	No	No	No	No	No		No
	AB	14	Guest 3	0	0	4	10	hint: if you are in a monogomous relationship with an already-infected person, all the morality in the world won't prevent your subsequent infection. you follow, smart guy?	Positive	No	No	No	No	No	2	No
	AB	14	Guest 3	1	0	5	10	"And then how would these STD's been passed on to humans, but through human to animal contact??" another question: how'd it get into the animal?	Positive	No	No	No	No	No		No
	AB	14	SuperLogic	0	0	11	23	So what's your point?? You're completely evading the issue. The whole point is, you can eliminate STD's by sexual fidelity, (No matter how it got started, that's moot)	Negative	No	No	No	No	Yes		No
	AB	14	Guest 3	0	0	6	10	i knew you wouldn't answer a single question.	Positive	No	No	No	No	No		No
	AB	14	Guest 3	0	0	7	10	how about you just answer these questions: 1. do you think God created STD's? 2. who was the first person to get the STD? 3. how did the STD get into the first infected person? i know your shaky theology will cloud your logic, so you likely won't answer at all..	Positive	No	No	No	No	No		No
	AB	14	Guest 3	0	0	8	10	your scripture says adam and eve were the first humans on earth...which one of the two was the STD carrier? no disrespect; you assert that STD's must have only a human source, if not contracted from animals. that said, which passed it to the other, or who was playing rough with the livestock? :0	Positive	No	No	No	No	No		No
	AB	14	SuperLogic	0	0	12	23	First off, these are pointless. It really doesn't matter how it got started. The issue is how it can be prevented, and eliminated. If you got rid of promiscuous sexual behavior, you want eliminate STD's. So, to answer your questions: 1. I think God warned us about promiscuity as he knew it would hurt us.... STD's, broken homes, broken families, broken people, abortions, etc, etc 2. I have no idea…	Negative	No	No	No	No	Yes		No
	AB	14	Guest 3	0	0	9	10	it does matter. and you know it. you can't argue in modern times when your base knowledge tells you god created all things, including std's.	Positive	No	No	No	No	No		No
	AB	14	Guest 3	0	0	10	10	you say getting rid of promiscuous behaviour would end STD's... that's false. verifiably false. but i know your christian literature makes you right above all proven medical science, yes? you are a bore. we're done here.	Positive	No	No	No	No	No		No
	AB	14	ihgfedcba	1	0	39	62	My interpretation of Superlogic's post is people would actually follow the religion religiously there would be no STI's or abortions or rape or incest or pedophilia. But we all know how well that worked out.	Positive	No	No	No	No	No		Yes
	AB	14	Here4thelaugh	2	0	1	1	Time for you to take a flying leap! Why don't YOU disappear?	Neutral	No	No	No	No	No		No
	AB	14	416elenorRIGBYjustactingCASULL	1	0	5	8	Isn't it really up to the people that send their kids to catholic school? If you feel that it's an imposition to get the shot elsewhere, send your kids to public school, or even better keep sending your kids to catholic school, but on election day change your tax status to public school, starve the bastards out. BTW, isn't this vaccine available at all the Safeway pharmacies? I had my flu shot th…	Positive	No	No	No	No	No		No
	AB	14	Marv50	9	0	1	1	Why not let the parents decide whether or not they want their kids to have the shot? Allow it in the schools but have a parent permission sheet (along with an informative pamphlet) sent home for their signature. I'm not sure this should be a mandatory vaccination but it should be readily available.	Positive	No	No	No	No	No	3	No
	AB	14	JTfromcalab	2	0	3	6	If memory serves, all the vaccines given to minors must have parental signed consent.	Neutral	No	No	No	No	No		No
	AB	14	don anderson	0	0	3	3	That is as it should be and that law should also apply to tattoos so as to apply to tattoo artists.	Neutral	No	No	No	No	No		No
	AB	14	ihgfedcba	0	0	40	62	A parental consent is already in place. The age is 16 for piercings and 18 for tats.	Positive	No	No	No	No	No		Yes
	AB	14	ihgfedcba	0	0	41	62	A whole package is sent home filled with pamphlets and websites and spells out all the risks. No consent form no vaccine. Any concerns written on the form are followed up with a phone call with plenty of time before the vaccination time slot. As for wasting money on the lawsuit on both ends, I feel it is worth it. Both have legal fees within their budget and the more the Catholics spend on this l…	Positive	No	No	No	No	No		Yes
	AB	14	wallynyyc	5	0	1	1	Apparently this comes down to parents that can't be bothered to take the kids to the family doc or health clinic. Those that believe it's wrong for either religious or anti-vaccine reasons would opt out anyway. Those, like our family, got it done with little effort at our doctors office. Absolutely no big deal. Three down, two more to go. Let's not waste our teaching budget on stupid lawsuits.	Positive	No	No	No	No	No	2	No
	AB	14	ihgfedcba	0	0	42	62	The teaching budget will be blown regardless.	Positive	No	No	No	No	No		Yes
	AB	14	calm_under_fire	5	0	1	1	This constant assault on our school system to perform anything but education has to stop. I am all for the HPV shot but why does it have to be administered in the schools? It is a hot button issue that this HPV Calgary group is trying to push into a place of learning. Can you imagine the organization by schools it would take to administer. I'm sure that their are plenty of parents that DO NOT wan…	Positive	No	No	No	No	No	3	No
	AB	14	ihgfedcba	0	0	43	62	Vaccination in schools have eliminated serious diseases. Cost effective and the highest number of vaccines. Why have thousands of kids who get driven or bussed, one at a time to a clinic when in that same amount of time have no gasoline used and a whole school vaccinated. Makes sense to me.	Positive	No	No	No	No	No		Yes
	AB	14	observer53	2	0	2	4	Will the "health activists" be forcing vaccinations on Muslims too ?	Negative	No	No	No	No	No		No
	AB	14	Guest 4	1	0	1	2	seriously? we're talking about the CATHOLIC school board here. ..and what's with all the FORCING talk? nobody's forcing anything. they want it AVAILABLE to the catholic students just like the public students.	Positive	No	No	No	No	No		No
	AB	14	Will_Riker	6	0	1	1	Yes in this case we are talking about Catholics. But let's just think about this idea for a second. If an Islamic school or board says they are not going to be allowing this vaccine because it contravenes an idea of the faith, would they have the same backlash that the Catholic school board is facing. I honestly don't think so because it is much more politically and socially acceptable to hate ag…	Mixed	No	No	No	No	No		No
	AB	14	Guest 4	0	0	2	2	good question, and i'm not sure what would happen. many vaccinations are routinely given to kids at school. i think the doctors just want the catholic system girls to have equal access is all.. as for the all the politcal correctness between religions: i'm atheist, so the whole argument is moot in my books. all i can do is shake my head at the insnity of the whole mess about the magic men in the …	Positive	No	No	No	No	No		No
	AB	14	ScottSOT	0	0	8	11	It is available. Just not through the school.	Negative	No	No	No	Yes	No		No
	AB	14	Guest 5	1	0	1	1	i'm aware of that. if it can be administered through the CCSB, then it would be free, without the need for extra travel or missed time. the only hang up here is that the good bishop thinks it will turn little girls into stark raving sl!ts. unreal.	Positive	No	No	No	No	No	2	No
	AB	14	ihgfedcba	1	0	44	62	Including the vaccine in the already established vaccine school program will ensure of a wipe out of the disease like the other diseases that have been eliminated by mass vaccination. Leaving it up to the parents who may be too busy to bother with the health of their child is far too common.	Positive	No	No	No	No	No	2	Yes
	AB	14	Ann Nonomass	0	0	1	3	SLUZT WALK ANYONE? willy, your 30 years out of touch, todays girls will drop their pants for nothing.	Neutral	No	No	No	No	No		No
	AB	14	observer53	0	0	3	4	The whole point of the lawsuit would be to FORCE the Catholic school board to allow the vaccinations on their property. Would the activists FORCE a Muslim mosque to allow the vaccinations on their property ? I am not Catholic, I just can't stand the political correctness, hypocrisy and self-righteousness of all these "activist" groups who think they have some divine right to force their views/opi…	Negative	No	No	No	No	No		No
	AB	14	Shack23	0	0	2	4	The dinosaurs in the Catholic Church never learn. They probably believe that no Catholic women have ever used birth control. But they were very good for years in the cover up of the pedophile priests.	Positive	No	No	No	No	No		No
	AB	14	ScottSOT	1	0	9	11	It should be left up to the parents or guardian of the child. The job of Health Services is to educate the parents.	Negative	No	No	No	Yes	No	3	No
	AB	14	Shack23	1	0	3	4	No one is forcing parents to have their kids vaccinated but it is much easier to have it done at school for the parents responsible enough to want their children protected. The Catholic stance is garbage. If your child is going to have sex, she will do so whether vaccinated or not. To say that getting protected will lead to sex is old school Catholic nonsense. Do you really believe that no Cathol…	Positive	No	No	No	No	No	2	No
	AB	14	ihgfedcba	0	0	45	62	The idea that the HPV vaccine will promote promiscuity among grade 5 girls is really doing a disservice to catholic girls. Does the Bishop have that little of faith in catholic youth? When grade 5 girls and boys learn that a vaccine is needed to protect them from HPV, a cancer causing disease and the way to contract this disease is by having sex, tends to stop any idea of having sex for a long lo…	Positive	No	No	No	No	No		Yes
	AB	14	ScottSOT	1	0	10	11	OK Class, we're spending way to much of our valuable time on this common sense issue. Dr. Ian Mitchell (and others) make claim that this is a life or death issue. The cause of HPV is believed to be known and to the best of the expert's knowledge is factual data. Because most children go to school, (mostly in either Public or Separate) it is easy for Health Services to reach larger number of child…	Negative	No	No	No	Yes	No		No
	AB	14	Anne2005	4	0	2	2	I am the mother of a girl attending a Catholic School in Calgary. I absolutely feel the Catholic School Board should allow the HPV vaccine to be given at school. I strongly believe the link to the HPV vaccine and a girl being promiscuous is laughable. Even if my daughter is a model Catholic and is abstinent until she gets married (which, if I'm being honest, is unlikely), there is nothing to say …	Positive	No	No	No	Yes	No	3	Yes
	AB	14	Kathy Roberge Lamb	1	0	1	1	My daughter is in grade five in the public system and will be getting this vaccination in November. As a responsible parent, I did my homework - as I did for all previous immunizations. - and anything I can do to protect my daughter from HPV I will do. She is ten years old and has NO IDEA that this is vaccination to prevent a sexually transmitted disease. She knows that she is getting protected f…	Positive	No	No	No	No	No	2	Yes
	AB	14	ihgfedcba	0	0	46	62	The vaccine is administered in 3 shots. November, February and May.	Positive	No	No	No	No	No		Yes
	AB	14	Warren Wooden	0	0	1	1	I think this is a great idea, protecting our children is important.	Positive	No	No	No	No	No		No
	AB	14	Ann Nonomass	0	0	2	3	hello ? if parents are worried - take them YOURSELF	Neutral	No	No	No	No	No		No
	AB	14	ihgfedcba	0	0	47	62	I am replying to you here regarding this post you made earlier. SLUZT WALK ANYONE? willy, your 30 years out of touch, todays girls will drop their pants for nothing. You been reading too much American culture myths or watching too much porn. Girls are not as promiscuous as they were growing up through the 60's sexual revolution. Teen pregnancies are way down. All this sexualizing being thrown in …	Positive	No	No	No	No	No		Yes
	AB	14	364027	1	0	1	4	The HP Vaccine is made available to anyone who wishes to receive it and you can opt out at the public schools as parents simply don’t sign the consent forms. By not offering it in the Catholic schools effectively takes the option away from parents that don’t know where to go, can’t get there, or are too lazy to take their children. It also increases the cost of delivering these vaccines. While al…	Positive	No	No	No	No	No	2	Yes
	AB	14	Ryan Carter	0	0	1	1	By not offering it in the Catholic schools effectively takes the option away from parents that don’t know where to go, can’t get there, or are too lazy to take their children. It also increases the cost of delivering these vaccines. It doens't take away any options. You can still get the vaccine at the same clinics they were bringing their children to for all their infant and toddler vaccines. Do…	Mixed	No	No	No	No	No	3	No
	AB	14	364027	0	0	2	4	Ryan, Don’t focus on why someone might not be able to go to a clinic to get a vaccine because the reason truly does not matter. Some situations will be reasonable and others are not but again that is not important. As for the cost of administering these vaccines in the schools consider the following. My daughters had the vaccine in grade four so let us assume that 80% of the girl’s parents in gra…	Positive	No	No	No	No	No		Yes
	AB	14	ihgfedcba	0	0	48	62	One more reason to use schools is to reach the greatest amount of the population as possible at the most convenient location costing the least amount to the health care. I used to be anti vax but the more I read the more I realized how loony and radical the blogs were and of course the whole study done of 'vaccines caused harm' was bogus and admitted to being skewed by the doctors who wrote it.	Positive	No	No	No	No	No	2	Yes
	AB	14	b3n_34y3ars	0	0	10	23	Before I would give my daughter this vaccine,I would do some research in regards to this drug. I would ask questions like: How effective is this drug and what is it's effective life? Has there been a long term study done? What are the results? What are the side effects? Don't get caught up in the issue of where this drug should be administed..... or because you've been convinced someone says it's…	Negative	No	No	No	Yes	No		Yes
	AB	14	ihgfedcba	0	0	49	62	In doing your research you have to recognize what sites are promoted by conspirators, tinfoil hatters and 99%occupiers.	Positive	No	No	No	No	No		Yes
	AB	14	b3n_34y3ars	0	0	11	23	If you have any sense of intelligence you should be able to distinquish the difference, including when big pharma that tells you their product is safe, and has no adverse effects and must be taken.	Negative	No	No	No	Yes	No		Yes
	AB	14	ihgfedcba	0	0	50	62	It does take intelligence, and it is obvious you have none. You better add another layer of tin foil to that hat, it is told that ones with the lesser brain cells go first. Thousands of girls in Calgary schools have received the vaccine, 0 side effects.	Positive	No	No	No	No	No		Yes
	AB	14	b3n_34y3ars	0	0	12	23	Thousands...no, hundreds of thousands of women took DES (Di-Ethyl-Stilbestrol) or Thalidomide with no side effects......	Negative	No	No	No	Yes	No		Yes
	AB	14	JTfromcalab	0	0	4	6	JoeBlow444: http://www.cdc.gov/std/hpv/std... Genital human papillomavirus (also called HPV) is the most common sexually transmitted infection (STI). There are more than 40 HPV types that can infect the genital areas of males and females. These HPV types can also infect the mouth and throat. Most people who become infected with HPV do not even know they have it. HPV is a virus that is transmitted…	Neutral	Yes	No	No	No	No		No
	AB	14	JTfromcalab	0	0	5	6	Suddenly, comments with web links are being moderated?	Neutral	No	No	No	No	No		No
	AB	14	b3n_34y3ars	0	0	13	23	and not being allowed.....what happened to freedom of speech? somebody edits and removes....... What's the deal Sun newspaper?	Negative	No	No	No	Yes	No		Yes
	AB	14	JTfromcalab	0	0	6	6	JoeBlow444: This info is from the CDC website: Genital human papillomavirus (also called HPV) is the most common sexually transmitted infection (STI). There are more than 40 HPV types that can infect the genital areas of males and females. These HPV types can also infect the mouth and throat. Most people who become infected with HPV do not even know they have it. HPV is a virus. It just so happen…	Neutral	Yes	No	No	No	No		No
	AB	14	b3n_34y3ars	0	0	14	23	More than several strains....... 30 of them are associated with below-the-belt cancer,out of 100 strains of HPV Gardasil and Cervarix target two types—numbers 16 and 18—that are thought to be major root causes of cervical cancer, says vaccine developer Diane M. Harper, M.D. Indeed, research shows the shots provide complete protection from both 16 and 18, and Cervarix offers extra protection again…	Negative	Yes	No	No	Yes	No	1	Yes
	AB	14	mikemanchester81	0	0	1	8	No, it isn't 100% effective. But the vaccine works against 4 strains (2 that are responsible for 70% of cervical cancers and another 2 that are responsible for 90% of genital warts) and it seems to offer partial protection against some other strains. It's definitely an effective vaccination, but people who receive it should not assume they are protected from cervical cancer and/or warts.	Positive	Yes	No	No	No	No		No
	AB	14	b3n_34y3ars	0	0	15	23	and only effective for 5 years...if effective.	Negative	No	No	No	Yes	No		Yes
	AB	14	ihgfedcba	0	0	51	62	Most vaccines need a booster every 10 years. HPV vaccine protects from the strains that are most likely to cause cervical cancer.	Positive	No	No	No	No	No		Yes
	AB	14	MrStraight	0	0	1	2	Kool-aid anyone?	Positive	No	No	No	No	No		No
	AB	14	ihgfedcba	0	0	52	62	Comes in all flavours.	Positive	No	No	No	No	No		Yes
	AB	14	MrStraight	0	0	2	2	Why don't these three people put their efforts into getting these Catholic girls access to shots instead of tilting windmills? Put the effort into what you preach!	Positive	No	No	No	No	No		No
	AB	14	Comment	0	0	1	3	The choice is simple move your children and tax dollars to public or charter schools. The way to change things is to speak to the wallet.The bishop is the one who knowingly brought in the pedophile priest from Winnipeg so we know he doesn't have a Christian bone in his body.	Positive	No	No	No	No	No		No
	AB	14	justsayno	2	0	42	52	Why no vaccinations? Since it was passed in the USA in 2006, there have been over 10,000 adverse effects (last time I checked a few years ago) reported to VARS. The HPV can be fought off by 90% of women within two years. There are 360 women who die every year in Canada due to cervical cancer mostly due to not having annual pap tests where it can be detected and if caught early enough can be cured…	Negative	Yes	No	No	No	No	1	Yes
	AB	14	ihgfedcba	0	0	53	62	The HPV vaccine will help these 360 Canadian women by lowering their chances of getting cervical cancer to begin with. Why spend all that time and money treating a cancer that can be prevented by a simple vaccine in school.	Positive	No	No	No	No	No		Yes
	AB	14	justsayno	3	0	43	52	What are the chances that Dr. Ian Mitchell either works for Merck or has taken a kickback for promoting it?	Negative	No	No	No	No	No		Yes
	AB	14	garyrock99	0	0	1	30	At least the Catholics stand up for their belief's, right or wrong. These clowns in the story don't care about the student's, they are typical left wing loons that think they know what's best for everyone and it should be done their way. Let them sue, they don't have a chance.	Negative	No	No	No	Yes	No		No
	AB	14	Mike Powell	0	0	1	1	Exactly.... If this story is factual, they have made it clear that this isn't about science.This is nothing more than social engineering. Look at this.... We have a medical system. We have family doctors who consult and advise us. We arrive at decisions based upon that. These three loons have made themselves look like total idiots. Guichon... she's a lawyer... and there isn't a lawyer that doesn'…	Negative	No	No	No	No	No		No
	AB	14	ihgfedcba	0	0	54	62	Though I appreciate the Catholics for taking a stand, it may be the stand that prevents HPV from being eradicated. If you think these medical/legal professions are left wing loons, trying reading some conspiracy blogs.	Positive	No	No	No	No	No		Yes
	AB	14	416elenorRIGBYjustactingCASULL	0	0	6	8	Which came first? The Catholic church or oral sex... Contraception? Virginity preserver? Sodomy? Ahh, still can transfer STD's,,,,but maybe not HPV? HaHa! Somebody stop me!!! HaHa	Mixed	No	No	No	No	No		No
	AB	14	ninetyninepct	0	0	1	1	Is the school board taking orders from an out of touch old geezer??	Positive	No	No	No	No	No		No
http://www.calgarysun.com/2012/11/29/bishop-disappointed-in-outcome-of-catholic-school-board-hpv-vaccination-vote	AB	15	calgrealist	21	3	1	1	The catholic church providing the rest of us with sexual morality advice. Hold on. Let me write this down...	Neutral	No	No	No	No	No		No
	AB	15	nrfnrd	5	2	1	1	Got that right. But bishop butt would not like that to happen.	Neutral	No	No	No	No	No		No
	AB	15	bert	1	3	1	7	And then whom, you? I made a funny.	Neutral	No	No	No	Yes	No		No
	AB	15	JoeBlow4444	2	0	5	8	Or someone who can actually have a family. At least some other religions allow their leaders to marry, have kids and (gasp) be women so they know first hand what it is like to raise a family.	Positive	No	No	No	No	No		No
	AB	15	garyrock99	0	3	2	30	I thought you get your morality from the Pride clan?	Negative	No	No	No	Yes	No		No
	AB	15	Mal_Depal	17	2	1	1	thank you, dr guichon for your perseverance. the bishop forgot to mention that merck could also benefit from providing the drugs administered when these young women develop the cancers the hpv virus causes, and merck's vaccine prevents. somehow the merck conspiracy theory doesn't really work.	Positive	No	No	No	No	No		No
	AB	15	xxxyyyccc	18	1	1	1	luckily no one gives a rat's axx what you think Bish ... now get back to your medieval thinking !!!	Positive	No	No	No	No	No		No
	AB	15	boating2011	30	0	1	5	You know what? I am still on the fence when it comes to some vaccines, including this one, and only because it seems to lack some bias free studies behind it. One thing I do know for sure, is that the catholic school board, including Bishop Fred Henry, is most definitely on the biased side. BUT, another thing I do know for sure, is that it is not the call of this bishop or the catholics. The deci…	Mixed	No	No	No	No	No	3	No
	AB	15	bert	3	12	2	7	Um, the Alberta constitution guarantees the right of seperate education. Thus, your tax payer argument is lame, like the rest of your drivel. I'm sure you're an active Catholic too...lol... So this is what business of yours? I pay taxes too that support transit which I don't use and schools (no kids). SHUT UP!	Neutral	No	No	No	Yes	No		No
	AB	15	416elenorRIGBYjustactingCASULL	17	0	7	8	Yes, we all pay taxes to pay for good educators, that get fired for giving zeros to students that are not doing their work. There is something very wrong here. HPV vaccines is just the tip of the iceberg. Common sense is no longer common. In fact it's almost impossible to find.	Positive	No	No	No	No	No		No
	AB	15	Dave Anderson	0	0	1	3	In Nova Scotia they even have sex offenders as teachers, as the NS Supreme court said so. Too many idiots in powerful places.	Neutral	No	No	No	No	No		No
	AB	15	mako madman	0	0	1	3	Kinda like the Catholic church then they just move their sex offenders to different parishes	Neutral	No	No	No	No	No		No
	AB	15	boating2011	4	0	2	5	Nice debating skills there bert ;) lol	Neutral	No	No	No	No	No		No
	AB	15	Ross O'brien	7	1	1	2	Perhaps someone should tell Fred Henry that the Inquisition ended more than 150 years ago, that the Church can no longer stifle and/or punish scientific progress and intellectual curiosity, that it is now 2012. The egregious injustices committed by the Church over the centuries amounted to horrendous crimes against humanity -- committed with absolute impunity. This is not the age of Copernicus, o…	Positive	No	No	No	No	No		No
	AB	15	Martin Wilson	4	1	5	42	Well put.	Positive	No	No	No	No	No		No
	AB	15	garyrock99	1	3	3	30	Taxpayers choose to support the Catholic system. But your doing good, you know 2 things in life that are for sure.	Negative	No	No	No	Yes	No		No
	AB	15	onevoteoneman	3	1	1	8	If i as a tax payer chose not to support the church . Where do i get my refund from?	Positive	No	No	No	No	No		No
	AB	15	ZiggyZagZag	3	1	1	9	Apparently, only God can refund your money, and you'll have to wait till he sets up his kingdom on earth before you see a red cent.	Positive	No	No	No	No	No		No
	AB	15	ljs60	2	1	2	2	Good One.	Neutral	No	No	No	No	No		No
	AB	15	Scott1945	0	0	18	20	You mean Allah, don't you?	Positive	No	No	No	No	No		No
	AB	15	ZiggyZagZag	0	0	2	9	*sigh* Imaginary sky-dwellers have so many names. Long story short...mosque, allah,..church, god, Ya feel me?	Positive	No	No	No	No	No		No
	AB	15	Scott1945	0	0	19	20	How about them Jews? "Ya feel me?" Really? How very 'street' of you....	Positive	No	No	No	No	No		No
	AB	15	ZiggyZagZag	0	0	3	9	What about the Jews?! Do you have a problem with them? Have a seat and tell Daddy all about it. Just don't put me to sleep like the last time, Ya feel me, foo?	Positive	No	No	No	No	No		No
	AB	15	Scott1945	0	0	20	20	I don't have a problem, but you obviously do. Don't remember any of your many hate filled rants against Israel? Here's one of your comments from the story on Canada's concern over Palestine gaining UN status: Israel is no different from a gangster who threatens the lives of witnesses, no different than a common thug who through intimidation, bribery and coercion are allowed to beat the rap.They a…	Positive	No	No	No	No	No		No
	AB	15	boating2011	4	1	3	5	I know one more thing for sure Gary... "your" in that context is spelled "you're". But you're doing good, you spelled most of the words correctly.	Neutral	No	No	No	No	No		No
	AB	15	Art__VanDalay	3	0	1	6	The little guy is trying so hard! Keep it up Gary, one day you'll figure it out!	Neutral	No	No	No	No	No		No
	AB	15	Mark Sandberg	3	1	1	1	Picking on spelling is always interesting behaviour. Especially when the grammar of the above needs help.	Neutral	No	No	No	No	No		No
	AB	15	boating2011	1	1	4	5	I normally don't really care how people spell in such a medium, but perhaps you should read the post I was replying to, and you will see why I was picking on his spelling.	Neutral	No	No	No	No	No		No
	AB	15	Martin Wilson	1	1	6	42	I know...It's hard not to point out every flaw in this know-it-all knob.	Positive	No	No	No	No	No		No
	AB	15	Martin Wilson	1	1	7	42	LOL!	Positive	No	No	No	No	No		No
	AB	15	JoeBlow4444	6	0	6	8	But don't you know, according to the Catholic Church, the best people to tell you how to run your family are men who are not allowed to have one for themselves (insert eye roll).	Positive	No	No	No	No	No		No
	AB	15	boating2011	4	0	5	5	Yeah, that is an odd thing.	Neutral	No	No	No	No	No		No
	AB	15	mako madman	0	0	2	3	Yes indeed and how many people would let their children spend the night at the good Bishops house,not many I'm thinking	Neutral	No	No	No	No	No		No
	AB	15	Niall Kennedy	17	2	1	1	Young people have to be educated about child molesters in the church.	Neutral	No	No	No	No	No		No
	AB	15	videokid	18	2	1	2	this bishop needs to check out how many priests have forced themselves on young children before beeking off about parents protecting and educating their children. in my own church growing up st. gerards, father white was charged for many sex crimes against young boys and i never set foot back in that church after the news came out. how dare the catholic church say anything about sex and young chi…	Neutral	No	No	No	No	No		No
	AB	15	bert	2	5	3	7	Was thinking the same thing about police, doctors, social workers, engineers, computer scientists... you do use the police, doctors, drive on roads, etc... right? If so, that makes you a ........ you guess.	Neutral	No	No	No	Yes	No		No
	AB	15	videokid	2	1	2	2	genius!	Neutral	No	No	No	No	No		No
	AB	15	Martin Wilson	0	0	8	42	Another vapid argument...how many doctors or police have been in the headlines of child abuse.	Positive	No	No	No	No	No		No
	AB	15	mako madman	0	0	3	3	You'd have to be nuts to leave your kids alone with one of these priests so why would anyone care about what they have to say about anything.	Neutral	No	No	No	No	No		No
	AB	15	thomasomalley	9	1	1	1	hmm, let me see Bishop more worried about premarital sex than the risk they may get HVP infected by a Catholic priest. Religion is for the lazy minded, if you don't want to think - take up religion	Positive	No	No	No	No	No		No
	AB	15	bert	0	8	4	7	Anti-religion thoughts are for bigots and fools, since you're argument is about as lame and tired as they come. Been there, dismissed that 10 years ago.	Neutral	No	No	No	Yes	No		No
	AB	15	Martin Wilson	8	2	9	42	What a crock. Unbelievers are usually the most rational folks around.I have never, in my entire life, met an atheist or an agnostic who was either a fool or a bigot. It never ceases to amaze me how defensive and reactionary Defenders of the Faith become when their house of cards is threatened.	Positive	No	No	No	No	No		No
	AB	15	Bert	2	7	5	7	Have you ever left Calgary, or your own basement. Keep bashing.... people like you have tried to kill religion for 2,000+ years with armies and empires, and their bones are dust but religion carries on. You can't win. You've already lost. Have a nice day. (You don't have many left.)	Neutral	No	No	No	Yes	No		No
	AB	15	Martin Wilson	3	1	10	42	Wow, Bert, one misassumption after another. I can't believe that you really think that religion is the victim. Most of the wars that have been fought and are still being fought, are by the Church, not against it.Perhaps you should do a little research before you lash out with your dogmatic ramblings. As a Christian, though, you never let facts stand in the way of your misguided faith. Your anger …	Positive	No	No	No	No	No		No
	AB	15	JoeBlow4444	1	0	7	8	Please don't lump all Christians in with Catholics. Just like I'm sure you would not want to be lumped in with everyone else who does not/did not believe in religion.	Positive	No	No	No	No	No		No
	AB	15	NovelT	0	0	1	8	Do we believe anything else from the bronze age? What are these athiest armies you speak of?	Neutral	No	No	No	No	No		No
	AB	15	I_can_read	3	2	1	1	"I have never, in my entire life, met an atheist or an agnostic who was either a fool or a bigot." I guess you don't get out much. Religion or lack thereof has nothing to do with rationality - both sides have more than their own fair share of fools & bigots.	Neutral	No	No	No	No	No		No
	AB	15	NovelT	5	1	2	8	Believing in folklore from the bronze age is not really rational to the thinking man.	Neutral	No	No	No	No	No		No
	AB	15	Geek Man	0	0	1	4	It's a self serving special interest group breeding club using your tax dollars. One day apparently they think they will cleanse earth and take it for theirs.	Positive	No	No	No	No	No		No
	AB	15	Papertroll	0	0	1	4	Well said.	Neutral	No	No	No	No	No		No
	AB	15	NovelT	0	0	3	8	Mark Twain was a bigot and a fool...?! pfft.	Neutral	No	No	No	No	No		No
	AB	15	Martin Wilson	0	0	11	42	So Bert, if "anti-religion thoughts are for bigots and fools" and you claim not to be a Christian then what... just pro-religion?	Positive	No	No	No	No	No		No
	AB	15	ihgfedcba	0	0	55	62	It is called freedom of religion.	Positive	No	No	No	No	No		Yes
	AB	15	Martin Wilson	1	0	12	42	Freedom of religion means being allowed to worship as you see fit without fear of persecution. It does not, however, include bashing another person's beliefs because they disagree with you. You'll notice that most of the comments against religion don't involve personal attacks on the individual.	Positive	No	No	No	No	No		No
	AB	15	ihgfedcba	1	0	56	62	This bashing another person's beliefs is exactly what you are doing. If the religion does not kill or do harm to anyone then let it be.	Positive	No	No	No	No	No		Yes
	AB	15	Martin Wilson	0	0	13	42	But that's the whole point here and you've completely missed it. Religion does harm and kill people..The Inquisition, the Salem Witch Trials, Islamic terrorists....all believed in their particular religion and all killed or did harm.	Positive	No	No	No	No	No		No
	AB	15	ihgfedcba	0	0	57	62	I do believe the Catholics have modernized since 1645. Terrorists and sex predators hide behind the religion to do their evil. Those kind are really not the religious sort.	Positive	No	No	No	No	No		Yes
	AB	15	Martin Wilson	0	0	14	42	They are the ultimate expression of religious zeal...all of them doing God's work.	Positive	No	No	No	No	No		No
	AB	15	ihgfedcba	0	0	58	62	They just claim to be but everyone knows(now you know too) they are only using religion as an excuse.	Positive	No	No	No	No	No		Yes
	AB	15	JohnathanGalt	0	3	12	37	If religious people are lazy minded, then what are brainless socialist sheep who swallow everything that the government tells them, hook, line, and sinker?	Negative	No	No	No	No	No		No
	AB	15	Art__VanDalay	6	1	2	6	Get another issue to rant about, you obsessed freak!~6 1	Neutral	No	No	No	No	No		No
	AB	15	JohnathanGalt	1	3	13	37	Bite me, you ignorant, thieving, entitled, nanny-state loving, freeloading socialist parasite. Stop stealing from me and you won't hear from me again. Otherwise enjoy my continuing rants.~1 3	Negative	No	No	No	No	No		No
	AB	15	onevoteoneman	0	0	2	8	If you and I don't pay taxes . Then i suppose business will pay our share of taxws . I'm up for that~	Positive	No	No	No	No	No		No
	AB	15	Hammertime_IN_AB	1	0	1	6	we all pay donkey, it's just those of us who work pay more.~1	Negative	No	No	No	No	No		No
	AB	15	onevoteoneman	0	0	3	8	It's good for you to pay more . Thanks dude~	Positive	No	No	No	No	No		No
	AB	15	Hammertime_IN_AB	0	0	2	6	Well donkey, by the time I'm as old as you I hope to pay less too. A good tax accountant is worth their weight in gold.~	Negative	No	No	No	No	No		No
	AB	15	onevoteoneman	0	0	4	8	Why are you being so nice . Bonus time ?~	Positive	No	No	No	No	No		No
	AB	15	JohnathanGalt	0	0	14	37	No one should pay taxes. The competitive, free market is the mechanism for people to get what they want by paying for it themselves.~	Negative	No	No	No	No	No		No
	AB	15	juansold	3	0	1	1	Shut up. Please. Just shut up.~3	Neutral	No	No	No	No	No		No
	AB	15	Ross O'brien	0	0	2	2	It is obviously a mental-health issue, amigo!~	Positive	No	No	No	No	No		No
	AB	15	JohnathanGalt	0	0	15	37	No.~	Negative	No	No	No	No	No		No
	AB	15	JohnathanGalt	0	0	16	37	Stop stealing from me. Please. Just stop stealing from me.~	Negative	No	No	No	No	No		No
	AB	15	Art__VanDalay	1	0	3	6	I make close to 100k per year working in the private sector and help run a small business on the side that employs several people. How exactly am I a free loading, thieving parasite?~1	Neutral	No	No	No	No	No		No
	AB	15	Martin Wilson	0	0	15	42	Name-calling and personal attacks are all they have. Logic and reason aren't in their arsenal. That would mean having to actually take ownership of all the misery and damage they've left in their wakes and that will never happen.~	Positive	No	No	No	No	No		No
	AB	15	JohnathanGalt	0	0	17	37	You support and encourage those who steal from me.~	Negative	No	No	No	No	No		No
	AB	15	JohnathanGalt	0	0	18	37	People who run their own businesses and see the direct results of the government's thievery don't usually kiss the government's a$$ with the verve and gusto that you display.	Negative	No	No	No	No	No		No
	AB	15	Eyesiss	1	0	1	4	In your world they are Sexually Transmitted Diseases.~1	Positive	No	No	No	No	No		No
	AB	15	JohnathanGalt	0	0	19	37	People are responsible for the consequences of their own actions. My philosophy is do what you want, but don't make me pay for your choices.~	Negative	No	No	No	No	No		No
	AB	15	onevoteoneman	0	0	5	8	Religion and the rich will not save you~	Positive	No	No	No	No	No		No
	AB	15	JohnathanGalt	1	0	20	37	Neither will socialism and the poor.~1	Negative	No	No	No	No	No		No
	AB	15	Martin Wilson	0	0	16	42	What about rationalism and common sense.~	Positive	No	No	No	No	No		No
	AB	15	JohnathanGalt	0	0	21	37	The only things that will save us are Individual Liberty and Private Property Rights.~	Negative	No	No	No	No	No		No
	AB	15	garyrock99	0	0	4	30	Thoams, I assume you waited to have sex until you were married, then you and your boyfriend consummated the marriage.~	Negative	No	No	No	Yes	No		No
	AB	15	Art__VanDalay	8	0	4	6	That was a hilarious joke....when I was in grade 8.~	Neutral	No	No	No	No	No		No
	AB	15	Martin Wilson	0	0	17	42	Hilarious, although I usually don't like to laugh at the handicapped.~	Positive	No	No	No	No	No		No
	AB	15	Martin Wilson	6	1	18	42	I always find it interesting that whenever the Catholic Church is pressured into abandoning their medieval attitudes, they always do so in the most begrudging fashion. If they had their way, we'd all still believe the earth was flat.~6 1	Positive	No	No	No	No	No		No
	AB	15	bert	2	4	6	7	Doesn't merit a response.~2 4	Neutral	No	No	No	Yes	No		No
	AB	15	Martin Wilson	4	1	19	42	Yet you responded.~4 1	Positive	No	No	No	No	No		No
	AB	15	bert	0	8	7	7	Was going to, true, but then I realized who I'd be arguing with. Can't make a moron a genius in one post, and that's all the time I have for the likes of you - more fun to watch you wallow in ignorance. (Yes, that makes TWO posts - you're so smart.)~ 8	Neutral	No	No	No	Yes	No		No
	AB	15	Martin Wilson	5	0	20	42	Careful Bert...you're Christian values are showing.~5	Positive	No	No	No	No	No		No
	AB	15	ihgfedcba	2	0	59	62	Standing up for the right to religion does not make one religious.~2	Positive	No	No	No	No	No		Yes
	AB	15	Martin Wilson	1	0	21	42	No, it makes one an enabler.Besides, Bert isn't standing up for religion, he personally attacks the unbelievers.~1	Positive	No	No	No	No	No		No
	AB	15	ihgfedcba	0	1	60	62	From what I read here, it is you who is attacking the religion.~ 1	Positive	No	No	No	No	No		Yes
	AB	15	Martin Wilson	0	0	22	42	Yes, I am attacking religion, but not the individuals through personal attacks.~	Positive	No	No	No	No	No		No
	AB	15	ihgfedcba	1	0	61	62	People have the right to religion. If you do not like or want religion then do not follow any. It is not your place to attack the people who do believe in religion.~1	Positive	No	No	No	No	No		Yes
	AB	15	Martin Wilson	0	0	23	42	Once again. I am not attacking the individuals but rather the institution. I have friends who are church-going folk and that's fine but does not make me able to forget the legacy left behind by various religions.~	Positive	No	No	No	No	No		No
	AB	15	Papertroll	0	0	2	4	Hey burt, notice all the neg votes your getting ?~Maybe its time to give up.~	Neutral	No	No	No	No	No		No
	AB	15	garyrock99	0	0	5	30	Not like you who is waiting for a spaceship to come and save you.~	Negative	No	No	No	Yes	No		No
	AB	15	Martin Wilson	0	0	24	42	No, not really. I don't buy into any of the fairy tales. If I did, however, there is far more proof that UFO's exist than God.~	Positive	No	No	No	No	No		No
	AB	15	NovelT	0	0	4	8	Much more likely.~	Neutral	No	No	No	No	No		No
	AB	15	RValois1	0	0	3	6	And God is - more likely a Alien will save you - and probe you and find nothing of substance!~	Neutral	No	No	No	No	No		No
	AB	15	Geek Man	6	0	2	4	They would still be torturing and burning the scientists and women who would not be controlled by them.~6	Positive	No	No	No	No	No		No
	AB	15	Geek Man	4	2	3	4	People are disappointed with this cult bishop.~4 2	Positive	No	No	No	No	No		No
	AB	15	Namnoot	13	0	1	1	Good call by the board. I'm all for supporting religious beliefs but there comes a time when common sense has to come into play. And anyway, parents should have the ultimate say on something like this, not the church. It's 2012.~13	Positive	No	No	No	No	No		No
	AB	15	CowtownDave	10	1	1	1	Why is this man 'consulted' on anything that has to do with the real world?~10 1	Positive	No	No	No	No	No		No
	AB	15	me	3	1	1	1	of the catholics i know, most are idiots, some are great but they dont follow the religion that was rammed down their throats. A few of the catholics I know are the most disgusting people, that claim that religion yet are drunks, druggies and all around dirtbags~3 1	Neutral	No	No	No	No	No		No
	AB	15	garyrock99	0	1	6	30	Your mother must be saddened knowing she spawned a total loser.~ 1	Negative	No	No	No	Yes	No		No
	AB	15	onevoteoneman	0	0	6	8	Most evolved people agree with Sheldon .~	Positive	No	No	No	No	No		No
	AB	15	Hammertime_IN_AB	0	0	3	6	and I agree with donkey.~Dang , what's that three times?~	Negative	No	No	No	No	No		No
	AB	15	Martin Wilson	0	0	25	42	Try defending your beliefs, not attacking the unbelievers.~	Positive	No	No	No	No	No		No
	AB	15	Art__VanDalay	1	0	5	6	That is literally all he ever does.~1	Neutral	No	No	No	No	No		No
	AB	15	Martin Wilson	0	0	26	42	Indeed...the last bastion of desperate thinking.~	Positive	No	No	No	No	No		No
	AB	15	garyrock99	0	0	7	30	Sorry Art. Now go cry to your wife how poorly you were treated.~	Negative	No	No	No	Yes	No		No
	AB	15	ZiggyZagZag	0	0	4	9	At least he has a wife. All you got is your greasy palm to cry to.~	Positive	No	No	No	No	No		No
	AB	15	Silvercloak	3	1	1	1	Some day you're going to wake up and realize that your entire thinking is still in the dark ages. But eh, that's religion for ya.~3 1	Positive	No	No	No	No	No		No
	AB	15	garyrock99	3	1	8	30	Call it right or wrong but at least the Catholics stand up for what they believe in and don't cave just because some limp wrists challenge them. Not like the United Church who would sell their souls' just to get someone in the pew. And how do they force their Religion on non Catholics as some of the loons here think?~3 1	Negative	No	No	No	Yes	No		No
	AB	15	ATF45	2	1	1	1	Which ones "stand up for what they believe in" - the bishops or the Catholic people? The Catholic bishop or the Catholic School Board? Perhaps it is both, which is, or course, the real conundrum. One of the problems is that the bishop wants to not only be able to say what the Church considers allowable, but to materially control the choices of others. I am Catholic and just wish the bishops would…	Positive	No	No	No	Yes	No	3	No
	AB	15	garyrock99	1	0	9	30	He never said you couldn't get your kid the vaccine Just not through the Catholic school system. You could have gone down to the nearest walk-in. Don't be so lame.~1	Negative	No	No	No	Yes	No		No
	AB	15	Eyesiss	1	1	2	4	It could be said that a pew in the United Church stays in the church. The pew from some other church may follow you around.~1 1	Positive	No	No	No	No	No		No
	AB	15	garyrock99	0	1	10	30	Are you sane?~ 1	Negative	No	No	No	Yes	No		No
	AB	15	Eyesiss	1	0	3	4	In your world, most likely not; and, thankfully so.~1	Positive	No	No	No	No	No		No
	AB	15	Guest 1	0	0	1	5	bingo. gosh i like you.~	Neutral	No	No	No	No	No		No
	AB	15	Eyesiss	0	0	4	4	Oh stop, you're making me blush; no, wait......sorry it was just a hot flash. Carry on. ;)~	Positive	No	No	No	No	No		No
	AB	15	NovelT	1	0	5	8	Yes if the United Church has there way everyone will be gay married... Only idiots think they have some kind of left wing agenda.~1	Neutral	No	No	No	No	No		No
	AB	15	Guest 1	1	0	2	5	lol.. i'm pretty sure i could wreck a gay marriage just as well as i wrecked 2 hetero marriages..~1	Neutral	No	No	No	No	No		No
	AB	15	Papertroll	1	0	3	4	Lol~1	Neutral	No	No	No	No	No		No
	AB	15	onevoteoneman	0	0	7	8	Pull their funding and take away the church's tax free status . Then we'll see what you say holds true ,~	Positive	No	No	No	No	No		No
	AB	15	garyrock99	0	0	11	30	Taxpayers choose to support the Catholic Church. It is also mandated in the Constitution of Canada. Why don't you educate yourself before you beaking off.~	Negative	No	No	No	Yes	No		No
	AB	15	Art__VanDalay	0		6	6	Taxpayer choose to support the church? When has anyone been given a choice in the matter?~	Neutral	No	No	No	No	No		No
	AB	15	NovelT	0	0	6	8	The Pope has actually said condoms are the "lesser evil" to HIV. One day the Catholic church will be as progressive as the United Church or they will be forced to die out. You think they are the same Catholic church as 100 years ago? What a bunch of crap.	Neutral	No	No	No	No	No		No
	AB	15	Guest 1	0	0	3	5	agreed. the Catholic Church will evolve, because its members evolve. I know a zillion catholics and not one of them is all 'dark ages' and crazy. they shake their heads at the old ways just like i do..~	Neutral	No	No	No	No	No		No
	AB	15	Martin Wilson	0	0	27	42	I wonder if that includes Creationism vs Darwinism?~	Positive	No	No	No	No	No		No
	AB	15	Guest 1	0	0	4	5	not likely.. not officially, anyway. i know catholics who tend to blend the two schools, and look at the bible as a series of 'metaphors'.~	Neutral	No	No	No	No	No		No
	AB	15	NovelT	0	0	7	8	I actually don't know one catholic that doesn't believe in evolution. I went to catholic school and my science teacher said it's pretty obvious.~	Neutral	No	No	No	No	No		No
	AB	15	Martin Wilson	0	0	28	42	True enough...it seems to be the Protestant religions that refuse to accept the science.~	Positive	No	No	No	No	No		No
	AB	15	Martin Wilson	0	0	29	42	That's just great logic...we're not as draconian as we used to be, so everything's okay now. Talk about a bunch of crap.~	Positive	No	No	No	No	No		No
	AB	15	NovelT	0	0	8	8	I hope the die out. You actually have to read what I was replying to to get the gist.~	Neutral	No	No	No	No	No		No
	AB	15	Martin Wilson	0	0	30	42	My apologies.~	Positive	No	No	No	No	No		No
	AB	15	Guest 1	0	0	5	5	that rant is either hilarious or total garbage; before i decide, tell me: were you being ironic or serious?~	Neutral	No	No	No	No	No		No
	AB	15	Posh66	1	0	1	2	You're right - the Catholic church is rigid and judgmental, and proud of it. They refuse to change their thinking even when it ruins people's lives - and that's why people are leaving the Catholic church in droves. Except in countries with the least education in the world. of course.~1	Neutral	No	No	No	No	No		No
	AB	15	Martin Wilson	0	0	31	42	Well said.~	Positive	No	No	No	No	No		No
	AB	15	Martin Wilson	0	0	32	42	The Catholic Church is responsible for more human suffering than any other entity in our history. Traditionally, the forces that the Church has been opposed to are reason, logic and science. Now you bible-thumpers can call me a moron, or a basement dweller or level any other type of disparaging remark against me you want. This does not, however, distract most rational people from the horrible leg…	Positive	No	No	No	No	No		No
	AB	15	garyrock99	0	0	12	30	Once again the no mind loon posts. The most human suffering was caused by your hero's Hitler, Pol Pot, Mao Ze-Dong and the rest. Christianity doesn't even rate. Google it and then shut your yap.~	Negative	No	No	No	Yes	No		No
	AB	15	Martin Wilson	1	0	33	42	Wrong! Let's start with the fact that I have PhD's in both Comparative Religion and Social History. Add to that the fact that Hitler,Pol Pot and Mao only inflicted suffering on humanity for a few years, whereas the Catholic Church has been at for centuries. you may think that Googling something makes you an expert, but in reality, you are the proof that a little bit of knowledge is a dangerous th…	Positive	No	No	No	No	No		No
	AB	15	Papertroll	2	0	4	4	If that does not shut him up nothing ever will. /popcorn~2	Neutral	No	No	No	No	No		No
	AB	15	garyrock99	0	0	13	30	Sorry Marty, your wrong and trying to spin out of it. Nice you have those PhD's Marty. What McDonald's did you say you worked at?~	Negative	No	No	No	Yes	No		No
	AB	15	Martin Wilson	0	0	34	42	Nice debating skills. Talking to you is like trying to explain Physics to a goat. It's been a while since I've seen someone so comfortable with making an ass out of themselves in public. I'm surprised you haven't said that i was a fat, Liberal Muslim.~	Positive	No	No	No	No	No		No
	AB	15	garyrock99	0	0	14	30	You're wrong Marty. Come on now and admit you're wrong. You won't because you have no spine,~	Negative	No	No	No	Yes	No		No
	AB	15	NTM	1	1	2	2	What job does Bishop Henry have and why us he part of this process?~1 1	Positive	No	No	No	No	No		No
	AB	15	garyrock99	0	0	15	30	Why ask the loons in here? Because you are to lazy to research yourself. Lame.~	Negative	No	No	No	No	No		No
	AB	15	Martin Wilson	1	0	35	42	You have got to be the biggest loudmouth I have had the displeasure of having to tolerate in these posts. You bully and call everyone names that don't agree with you. I thought that Christians were supposed to aspire to a higher ethical paradigm, you know, turn the other cheek. Apparently, Sunday Christians lose their ability to practice love and tolerance the moment they leave the building. Than…	Positive	No	No	No	No	No		No
	AB	15	garyrock99	0	1	16	30	So if I'm not a Christian I can bully and call names? Sorry, not a Christian and when my daughter is old enough she will get the vaccine. I go after the intolerant loons who want to impose there lame ideas on everyone else. Henry has just as many rights as the loons. And you want Christian's to turn the other cheek and be walked on? They have rights to but imbecile's like you think people should …	Negative	No	No	No	Yes	No		Yes
	AB	15	Martin Wilson	0	0	36	42	I don't see it as a failing to be intolerant of ignorance and abuse.~	Positive	No	No	No	No	No		No
	AB	15	garyrock99	0	0	17	30	That's because your head's up where the sun doesn't shine.~	Negative	No	No	No	Yes	No		No
	AB	15	Martin Wilson	0	0	37	42	Isn't it past your bedtime yet? The grown-ups would like to talk now.~	Positive	No	No	No	No	No		No
	AB	15	Posh66	0	0	2	2	Actually, I think it's Jesus who wants you to turn the other cheek, but why quibble?~	Neutral	No	No	No	No	No		No
	AB	15	Guest 2	2	0	1	1	job: Bishop~why: Bishop~2	Negative	No	No	No	No	No		No
	AB	15	René-Louis Baron	0	0	1	1	Disappointed? It's time religion gets investigated and charged for negligence because it is affecting the health of its followers. Not to mention birth control as well and protection from STD's. They are putting their followers in danger with their outdated and ridiculous views.~	Positive	No	No	No	No	No		No
	AB	15	onevoteoneman	0	0	8	8	Pull the funding , maybe then he'll do the right thing~	Positive	No	No	No	No	No		No
	AB	15	Hammertime_IN_AB	0	0	4	6	Well I am not religious, the Bishop is right about something though the Pharmaceutical company will be the winner here, although I don't suspect there will be all that many more shots handed out. It is another form of acceptance. Religions are generally as hypocritical as they get. The Catholic church has to be the worst. IMO.~Come on people, evolve already.~	Negative	No	No	No	No	No		No
	AB	15	Guest 3	0	0	1	1	agreed. but so will the girls who don't get cervical cancer..~	Positive	No	No	No	No	No		No
	AB	15	Guest 4	0	0	1	1	“The trustees did their job and I support them,” Henry said Thursday. i'll tellya what: i give the ol' Bishop a hard time, but i have to give him some respect on this one. the board made, what i believe to be, the proper decision regarding the HPV shots. it goes completely against what Bishop Henry believes in, but he backed the board anyway. That's a concession and a show of moderation i didn't …	Positive	No	No	No	No	No		No
	AB	15	Callum Iain Harrison	3	0	1	1	It's not about pharmaceutical companies cashing in, nor adolescents engaging in promiscuity. It's about shielding a young life from a terrible disease before it happens. ~Pharmacists (including the ones who work for manufacturing drug companies) spent all that time in university to TAKE CARE of people. We in health care as a whole are trying to make a difference to raise awareness that these dise…	Positive	No	Yes	No	Yes	No	2	No
	AB	15	garyrock99	0	0	18	30	Ok. We'll all take your word that it works with no long term effects.~	Negative	No	No	No	Yes	No		No
	AB	15	RValois1	0	0	4	6	Sorry Bishop Henry you lost all crediablity when you started talking about medical proposals and sexuality in the Catholic school system! The church is stuck in the 1700 century and is educateing it's members accordingly - so sad for our young people and the church!~	Positive	No	No	No	No	No		No
	AB	15	garyrock99	0	1	19	30	You need educating because you can't even spell educating, even with a spell check.~ 1	Negative	No	No	No	Yes	No		No
	AB	15	RValois1	0	0	5	6	You are rite! I was educated in the catholic system - go figure~	Positive	No	No	No	No	No		No
	AB	15	garyrock99	0	0	20	30	Catholic system student's attain better marks then public year after year. But there is always going to be dunces, sorry about your fate.~	Negative	No	No	No	Yes	No		No
	AB	15	Martin Wilson	0	0	38	42	Mark Twain must have been thinking of you when he said that it was better to say nothing and be thought a fool than open your mouth and have it confirmed.~	Positive	No	No	No	No	No		No
	AB	15	ZiggyZagZag	0	0	5	9	I bet you regret going to a public school.~	Positive	No	No	No	No	No		No
	AB	15	RValois1	0	0	6	6	Are you the school monitor or do you have anything interesting to contribute to the discussion!?~	Positive	No	No	No	No	No		No
	AB	15	garyrock99	0	0	21	30	Dat bee goad fur yer.~	Negative	No	No	No	Yes	No		No
	AB	15	Martin Wilson	0	1	39	42	Just a loudmouth bully with a keyboard... nothing new,RV, just pathetic and annoying.~ 1	Positive	No	No	No	No	No		No
	AB	15	Martin Wilson	0	0	40	42	At least he's not a POS liar, saying in one post that he has no kids and then making reference to his daughter in another. I guess so much crap comes out of you that it's hard for your limited skills to keep track of.~	Positive	No	No	No	No	No		No
	AB	15	garyrock99	0	2	22	30	Must be "Computer Day" in the Loon Wards today. They are out in full force.~ 2	Negative	No	No	No	Yes	No		No
	AB	15	ZiggyZagZag	0	0	6	9	Whose idea was it to allow churches to have free wifi?~	Positive	No	No	No	No	No		No
	AB	15	garyrock99	0	0	23	30	Didn't the ward nurse tell you you're hour is up?~	Negative	No	No	No	Yes	No		No
	AB	15	ZiggyZagZag	1	0	7	9	Yeah, just before she got off her knees, she did!~1	Positive	No	No	No	No	No		No
	AB	15	Martin Wilson	1	0	41	42	That's right...anyone who disagrees with the bully is a loon or a moron or a basement dweller, or an imbecile, or lazy, or a loser, or a bigot, or a fool. I apologize if I've missed any of your personal slurs, but clearly you need to be in anger management.~1	Positive	No	No	No	No	No		No
	AB	15	garyrock99	0	0	24	30	Ok Marty. I apologize. I'm sorry I made you cry.~	Negative	No	No	No	Yes	No		No
	AB	15	ZiggyZagZag	0	0	8	9	Recognize the truth when you read it, and the truth shall set you free. You really need the help.~	Positive	No	No	No	No	No		No
	AB	15	Martin Wilson	0	0	42	42	Always the aim of the bully.~	Positive	No	No	No	No	No		No
	AB	15	ZiggyZagZag	3	0	9	9	Once again science beats up on religion. As if the church ever stood a chance against facts, reality and truth.~3	Positive	No	No	No	No	No		No
	AB	15	Cameron Hodge	2	0	2	2	Fred Henry has always been a pathetic joke, he seems intent on ramming the point home as much as possible. I don't care what side of the debate you're coming from; if you're against a bloody cancer vaccine, you're an idiot.~2	Positive	No	No	No	No	No		No
	AB	15	garyrock99	0	2	25	30	I am against foul smells in Comment section's. I should have guessed, hodge is here.~ 2	Negative	No	No	No	Yes	No		No
	AB	15	Jeff Tides	0	0	1	1	Go to hell Hank~	Neutral	No	No	No	No	No		No
	AB	15	Comment	0	0	2	3	When this misoganist has cervical cancer he is free to comment on the matter Until then let him go play with pedophile priest he invited to Calgary.Never forget that he cares not for children or women.~	Positive	No	No	No	No	No		No
	AB	15	Flash_Bazbo	0	0	3	3	I would disagree with the Bishop, if the vaccine saves one life, it would be worthwhile and the person it saved would obviously have gained the most. But then again, I am not Catholic, and as my ex-wife told me....I am going to the "hot place" anyway.....and I don't think she meant Arizona.~	Positive	No	No	No	No	No		No
	AB	15	Wiser10	0	0	2	2	That old fart is still in the dark ages!~	Positive	No	No	No	No	No		No
	AB	15	Thomas	0	0	1	1	Fear of Cancer, really. Pot calling the kettle black considering he/ they promote an entire belief system based on the "fear of god".... incomplete science, how about blind faith!!! Is one fear better than the other, not sure I buy that considering cancer could happen to me in this immediate life time, the other, not sure, not dead yet!!~	Positive	No	No	No	No	No		No
	AB	15	kentnilsson	0	0	1	1	Bishop Henry needs to realize this is not the 1800's anymore. I can't think of a worse Bishop, arrogant and no idea what he is talking about half the time.~	Positive	No	No	No	No	No		No
	AB	15	Dave Anderson	0	0	2	3	Its hard to say. I believe it should be available yes. But forced no. That is, what goes into the child is an exclusive decision between the child and the parents. Schools big responsibility here is to teach that it exists in a unbiased educational way and let the families make their own choices.~	Mixed	No	No	No	No	No	3	No
	AB	15	garyrock99	0	0	26	30	You got that right.~	Negative	No	No	No	Yes	No		No
	AB	15	Comment	0	0	3	3	Has Henry had cervical cancer? If he has he can comment if not get on with his usual job of inviting pedophile priests to minister in calgary.~	Positive	No	No	No	No	No		No
	AB	15	catholics suck	0	0	1	1	I think it's funny that the catholic church is all worried about the kids having sex before marriage, but guess what, they already are. The sluttiest young girls I know, go to catholic schools, clearly telling them just don't do it, isnt working, so instead of putting fingers in their ears and going LA LA LA to make the problem go away, young people should be educated about safe sex.~	Positive	No	No	No	No	No		No
	AB	15	AmandaCody	0	0	1	2	When it comes to the health of young women and men, and saving a life, the church needs to stay out of it. Besides, in the catholic church the only ones that are permitted to have sex before marriage are the priests, as long as it's with young boys..~	Positive	No	No	No	No	No		No
	AB	15	Shack23	0	0	4	4	Someone once said of Catholic priests and the Pope - If you don't play the game, you don't get to make the rules. But that doesn't stop Catholics from telling everyone how to run their lives. The Catholic run Ireland just let a woman die rather than save her life by permitting an abortion of a baby already dead. The church is run by dinosaurs still in the Middle Ages who seem to believe that no C…	Positive	No	No	No	No	No		No
http://www.calgarysun.com/2012/10/15/study-sparks-renewed-push-for-calgary-catholic-trustees-to-allow-hpv-vaccine-in-schools	AB	16	Tysmind	10	1	1	1	Hmm..so let me get this straight...people want the right to inject their daughters with untested vaccination...with nary any evidence that it actually works, full of aluminum, formaldehyde et al. No thanks.	Negative	No	No	No	No	No		No
	AB	16	S P Arif Sahari Wibowo	1	0	1	1	Can you give references about this vaccine being untested? Thanks!	Positive	No	No	No	No	No		No
	AB	16	ScientiaVincereTenebras	2	0	1	2	How long will these forces from the dark middle ages, i.e. the Bishop and the Catholic School Board Trustees, who are knowingly inflicting terrible pain and disease on a generation of innocent girls, be allowed to operate unpunished in 21st Century Calgary? In the future, they should be made to pay for all the medical and other expenses that will be the direct result of their unethical decision m…	Positive	No	No	No	No	No		No
	AB	16	billybats	4	1	1	2	Yeah and lets all believe what the scientist tell us ....they're always right...NOT...they never use the population for their own interests. Drug companies really do care about all our daughters..it's not about the money really it's not. Wake up dip sh*t...get with reality.	Negative	No	No	No	No	Yes		No
	AB	16	billybats	4	1	2	2	"The most reliable way to prevent infection with either a high-risk or a low-risk HPV is to avoid any skin-to-skin oral, anal, or genital contact with another person. For those who are sexually active, a long-term, mutually monogamous relationship with an uninfected partner is the strategy most likely to prevent HPV infection" This from National Cancer Institute. So dip sh*t when you talk about "…	Negative	Yes	No	No	No	Yes		No
	AB	16	ScientiaVincereTenebras	3	0	2	2	Thank you billybats for sharing your insight. It would be instructive to see how your family doctor, who has a science-based degree, would react to your pearls of wisdom, when she diagnoses your daughter with cervical cancer. However, I guess we will never know, because you sound like an individual who would prefer to avoid medical doctors altogether, thereby saving Alberta a lot of taxpayers' mo…	Positive	No	No	No	No	No		No
	AB	16	scooby1234	2	0	1	1	if i was a dad i would be pushing my daughters to get it. its science people.	Positive	No	No	No	No	No		No
	AB	16	Cowtown Twit	5	1	1	1	Out of the dozens of types of cervical cancer this vaccine works on 3 of them, meanwhile dozens have died in the US after getting the vaccine, take your pick, just know the risks on both sides. As far as the Catholic board is concerned, people decide to put their kids in it, perhaps that is why, they don't want a vaccine pushed on them. Who is really pushing this, who won't leave it alone? The va…	Negative	No	No	No	No	No	1	No
	AB	16	Luke Fevin	1	0	1	1	"meanwhile dozens have died in the US after getting the vaccine" - please provide evidence for this statement.	Positive	No	No	No	No	No		No
	AB	16	observer53	6	1	4	4	The real issue here is the intolerant nanny-state social engineers trying to force their way upon the Catholic church. Any parents who want their daughter(s) to get the injection can do so without the bullies forcing the program upon the Catholic school board.	Negative	No	No	No	No	No		No
	AB	16	StevenAspenlieder	1	0	2	5	Religion is to GOD as bull fighting is to agriculture. You dont have to go to church to believe in GOD just as you dont have to go to the rodeo because you enjoy a good steak. And you dont have to follow religious doctrine as Bishop Henry interprets the world to get a vaccine. Get the shot from your doctor. If it were up to Bishop Henry anyone visiting Vegas would have to forfiet their passport. …	Positive	No	No	No	No	No		No
	AB	16	Dave Anderson	1	0	3	3	Whatever happened to right of choice? Are we treating people like cattle and/or sheep? Should we all say moo or bahbahbah? Our society needs to learn respect for other peoples opinions, other peoples rights of choice where it really doesn't affect them much. Pro-chice, the only choice as I somehow think gov'mint would also like to tell you what to eat....sooner or later it will be who and how to …	Mixed	No	No	No	No	No		No
	AB	16	b3n_34y3ars	0	1	16	23	Science gave women Diethylstilbestrol (DES) ,Five to ten million women have used it. More than 30 years of research have confirmed that health risks are associated with DES exposure, breast cancer and vaginal cancer among the health risks. Science gave women thalidomide, It is not known exactly how many worldwide victims of the drug there have been, although estimates range from 10,000 to 20,000 …	Negative	No	No	No	Yes	No		Yes
http://www.calgarysun.com/2012/10/15/new-study-prompts-push-for-calgary-catholic-school-board-to-drop-ban-on-hpv-vaccine	AB	17	JohnathanGalt	8	0	22	37	What was the elapsed time period of the study? Was there a control group? Was it a statistically significant sampling? Sounds like junk science.~8	Negative	No	No	No	No	No		No
	AB	17	scottsatrollingrat	5	0	7	11	sounds like junk religion~5	Neutral	No	No	No	No	No		No
	AB	17	JohnathanGalt	3	0	23	37	The junk religion called "Socialism".~3	Negative	No	No	No	No	No		No
	AB	17	scottsatrollingrat	0	0	8	11	sorry cowboy I'm agnostic, better luck next time~	Neutral	No	No	No	No	No		No
	AB	17	JohnathanGalt	0	0	24	37	You're agnostic when it comes to socialism? In your posts you sound like a true believer, that has embraced the way of thievery and nanny-statism. Your undying faith and fealty to socialism puts the saints to shame.	Negative	No	No	No	No	No		No
	AB	17	kromane	1	0	6	8	Go away Troll~1	Neutral	No	No	No	No	No		No
	AB	17	harcur	1	0	5	24	Canada is one of the hardest countries in the WORLD to get a medical patten approved in. It did not happen in a few years.~1	Positive	No	No	No	No	No		No
	AB	17	JohnathanGalt	0	0	25	37	Thalidomide was also approved for use in Canada by the Canadian government. Anyway, I was referring to the "promiscuity study".~	Negative	No	No	No	No	No		No
	AB	17	Maximum_Headroom	25	0	1	3	The only Fear mongering and pressure isn't by the Church but by the Calgary Sun and others trying to scare and force the Catholic Church in doing what it preaches against. Bishop Henry is 100% right.~25	Negative	No	No	No	Yes	Yes		No
	AB	17	harcur	8	0	6	24	Henry is 100% idiot. If he had a close friend who's daughter got this illness would he change his mind. I think he might. He is stuck in the 1600s and the ways of most churches have changed since then.Thank whoever.If he thinks some tweens are gonna go crazy for sex now that they got ''thier shot'' he is way to simple a man to be telling anyone ,let alone all Calgary's Catholic church members how…	Positive	No	No	No	No	No		No
	AB	17	Maximum_Headroom	16	0	2	3	He is right 100% Why is it you cannot have an intelligent conversation without insulting someone? You only make yourself look bad. If you want to protect your daughter than go get the vaccine at your local Safeway pharmacy. There is no need to force a church to give it out in their schools. This is a group of Hitler types trying to intimidate and force a church to violate it's beliefs in the name…	Negative	No	No	No	Yes	Yes		No
	AB	17	Cfett	5	0	1	1	Because ensuring girls have easy access to a vaccine that could eventualy save their lives is exactly like genocide.~5	Positive	No	No	No	No	No		No
	AB	17	justsayno	1	0	44	52	To Cfett, the manufacturer of the vaccine Merck (smirk) has no evidence that it saves anyones life.~1	Negative	No	No	No	No	No		Yes
	AB	17	Aton Rekoobecaf	4	0	4	4	@justsayno... HPV can lead to cervical cancer. If they can prevent cancer by preventing HPV, that saves lives.~4	Positive	No	No	No	No	No		No
	AB	17	justsayno	1	0	45	52	@ Aton, annual or bi-annual pap tests can catch it early enough and as per Health Canada if caught early enough can be cured. You don't need an unproven vaccine.~1	Negative	No	No	No	No	No		Yes
	AB	17	willy44	5	0	1	2	Exactly, Maximum. It is readily available and shouldn't be forced by legal action, as is mentioned in the article. I thought this was a "free" country, and religions were free to practice their faith. (And you others, don't give me examples of radical religions - you know what I'm talking about.) Any parent that wants their daughter to get the vaccine safely and easily can do so. They are not pro…	Mixed	No	No	No	No	No	3	No
	AB	17	harcur	1	0	7	24	If you want to run a religious school do it out of your own pockets. The catholic schools collect and spend money off all taxpayers not just catholics.When some of these girls have this disease through no fault of there own are you going to pay all thier hospital bills maxipad ?~1	Positive	No	No	No	No	No		No
	AB	17	Jim_knuckles	12	0	2	8	To Harcar - Again you would be wrong. all unallocated taxes go to the Public system unless you fill out a form requesting your taxes be allocated to the Catholic School System. Quite a few students who attend Catholic School who don't fill out the forms even though they are in the Catholic Systems their taxes go to the Public system by default because the Property Tax form has not been filled out…	Negative	No	No	No	No	Yes		No
	AB	17	StevenAspenlieder	0	0	3	5	Henry does have a close friend. Its his right hand man who conducts the interviews for annulments. A very close relationship much in the same vane that J Edgar had with his.~	Positive	No	No	No	No	No		No
	AB	17	364027	3	0	3	4	Sorry Max but you and Fred Henry are both wrong. This vaccine is simply insurance against what might happen, cervical cancer in women. I'm sure that all of the Catholic Churches under Henry have fire insurance. Does having fire insurance cause churches to catch fire more often than those without insurance, I think not. When Henry has a medical degree then he will have some authority on what shoul…	Positive	No	No	No	No	No		Yes
	AB	17	Jim_knuckles	15	0	3	8	There is no insurance. Science will not guarantee it prevents it. There is as many HPV positive ladies with Cervical Cancer as there is Non positive Ladies with Cervical cancer. So this shows that you are also wrong. If you want your daughter to get it go to the Safeway pharmacy and get it. Stop trying to prove your a Hitler or dictator wanna be and force the Catholic Church to give it out. No I'…	Negative	No	No	No	No	Yes	1	No
	AB	17	364027	1	0	4	4	The province funds the catholic school board and when the the catholic school board. Unless the catholic school board is willing to go without this funding then it has no say in this matter. Regardless of whether or not anyone believes in this or any vaccine they should have the choice to accept or refuse it. The catholic church/school board does not have the right to deny anyone the choice. Whil…	Positive	No	No	No	No	No		Yes
	AB	17	Johndilinger	5	0	8	12	T0 364027 - That was another Hitler dictator type tactic. The government gives the Catholic School System Less funds than the public system and that is for education only. They have absolutely no say on moral biblical beliefs. The Very same Government also guarantee's freedom of religion and the right under the constitution to say no to Hitler type tactics. This is nothing for you about a vaccine…	Negative	No	No	No	No	No		Yes
	AB	17	harcur	1	0	8	24	bullsh-t your not a catholic and why not have the catholic board set up a room,any room in the school for girls who's parents want them to get the shot. Not EVERY CATHOLICKER is against providing the chance for thier children to beat this disease.You are the nazi saying no way not in my school. wHY IN THE WORLD WOULD ANY RESPONSIBLE PARENT NOT WANT TO GIVE THIER KIDS PROTECTION AGAINST EVERYTHING…	Positive	No	No	No	No	No		No
	AB	17	Jim_knuckles	3	0	4	8	You just made my point for me Harcar with your prejudiced hatred of Catholics your "Catholicker" makes the comment. As stated before for you and several others this is not about a vaccine but a power trip to spew your hatred. Your on the same level as those who`express hatred`against the Jews and the homosexuals. A hatred that makes you look bad and I feel sorry for you.~3	Negative	No	No	No	No	Yes		No
	AB	17	Julio P	0	0	3	3	Absolutely right Jim harcar will be at your house in his white robes and pointy hat burning crosses.~	Negative	No	No	No	Yes	Yes		No
	AB	17	Oscar Owens	2	0	1	4	Like, 100% right on the fact that no evidence is required to back up his claims? 100% right in that, even though this study provides concrete evidence to the contrary, Fred Henry still thinks he's right??? 100% right that he is going to stubbornly continue his opposition to this issue even though he is actively fighting against something that will save many, many people from getting a totally pre…	Positive	No	No	No	No	No		No
	AB	17	Outfromthebleachers	2	0	1	1	Old school Religion and Ignorance go hand in hand. Proven time and time again. I am 100% catholic and my children all attend Catholic School and I am appauled by this 1950's mentality. You talk of Hitler types, By not offering the vaccine, i find it more gastopo than offering it for the protection of our youth. If you don't want you child to have it due to your religious views than excuse then fr…	Positive	No	No	No	Yes	No	2	Yes
	AB	17	Jim_knuckles	22	0	5	8	I'm sorry these people completely miss the point. It is not about wither this makes girls think it's safe to have sex which a long with condoms, the pill and other various devices does make them think they are generally safe. By giving out Condemns, the pill or this Vaccine gives the idea that the church on one hand preach "save it till your married" while handing this crap out in schools. Makes …	Negative	No	No	No	No	Yes	1	No
	AB	17	harcur	0	0	9	24	So if your daughter saves her virginity until she is married and her new husband gives her this desease what are you going to say to her? ''I'm sorry sweety but I did'nt want you to f-uck around.'' I SUPPOSE THAT WILL CUT IT IN YOUR MIND IF SHE DIES FROM IT.~	Positive	No	No	No	No	No		No
	AB	17	Jim_knuckles	3	0	6	8	See Harcar, that's point your missing. Before anyone gets married they will see a doctor and be tested for all known sexually transmitted diseases. HPV is nothing compared to some of the diseases someone can get so both should always be tested.~3	Negative	No	No	No	No	Yes		No
	AB	17	Sarcee	9	0	1	1	Jim_knuckles writes, "As well individuals bare 100% responsibility for the choices they make." This statement is incorrect when it comes to HPV. Women contract HPV that leads to cervical cancer from men. A woman who follows Catholic teaching and is a virgin when she marries can get HPV from her husband on her wedding night. A child who is sexually abused can contract HPV from the rapist. Protect …	Positive	No	No	No	No	No	2	No
	AB	17	Maximum_Headroom	14	0	3	3	You are incorrect HPV is sexually contracted disease and there is a vastly greater chance that you will contract it via multiple partners. The fewer the partners the less likely you are to contract it. Also science will not guarantee you will not get this cancer if you get the vaccine. a large amount of woman who tested HPV positive received this cancer. Also a vast majority of ladies who tested …	Negative	No	No	No	Yes	Yes	1	No
	AB	17	JoeBlow4444	1	0	8	8	He/she was simply pointing out that you can still get it by only having one partner, they did not disspute that your chances increase with multiple partners. Judging from your posts I am going to guess that you are Catholic? IF so, do you or have you ever used birth control? Even while married? If so, then you can't really tell other people that they should follow something the Catholic Church pr…	Positive	No	No	No	No	No		No
	AB	17	harcur	0	0	10	24	Very well said.~	Positive	No	No	No	No	No		No
	AB	17	dapopa	5	0	1	1	Henry is probably a nice guy and good bishop but he should have left his fundemantalist views and controlling tantrums in Thunder Bay, which are NOT welcome in Southern Alberta.. Good way to loose parishoners Fred~5	Positive	No	No	No	No	No		No
	AB	17	TheMoose	1	0	1	1	I have to agree with Bishop Henry on this. The vaccine is likely already available through family doctors. If this is allowed in schools then it will open the flood gates for all sorts of "worthy causes" that schools simply shouldn't be involved with. For example, should schools also dispense "fluoride" to unprivledged students? Let's concentrate on education and forget the other causes that do n…	Negative	No	No	No	No	No	1	No
	AB	17	scottsatrollingrat	2	0	9	11	Catholics concentrate on control then education . It's about what he says not what is the right thing to do.~2	Neutral	No	No	No	No	No		No
	AB	17	kromane	0	0	7	8	Go away Troll~	Neutral	No	No	No	No	No		No
	AB	17	shipsternsbluff	2	0	1	1	they have said its a moral issue....coming from a bishop in the catholic church....keep your bronze aged beliefs out of a womans body, no matter how young or old they are...if doctors and scientists say this will help prevent cancers, it should be mandated...no matter if you think it might make girls into fornicators....~2	Positive	No	No	No	No	No		No
	AB	17	willy44	2	0	2	2	Mandated??? What country are we living in? Government mandates too much already. It should remain a parental responsibility. Government's role should be to educate the pupulace, and allow them to make their own decisions.~2	Mixed	No	No	No	No	No		No
	AB	17	harcur	0	0	11	24	And keep your bronz aged priests beliefs away from young boys bodies.~	Positive	No	No	No	No	No		No
	AB	17	Guest 1	1	0	1	1	It seems on one hand, Catholic girls are these defenseless victims and yet on the other hand they are modern young women. Talk with a catholic young woman about to graduate and see for yourself whether or not she can think for herself and make good healthcare choices for herself. These young ladies are aware of the issues and what they face in the real world. They are not stupid and they are not …	Mixed	No	No	No	No	No	3	No
	AB	17	scottsatrollingrat	0	0	10	11	Catholics are always weak minded and immaturaty reins in Catholic schools~	Neutral	No	No	No	No	No		No
	AB	17	kromane	1	0	8	8	Go away Troll~1	Neutral	No	No	No	No	No		No
	AB	17	Hammertime_IN_AB	0	0	5	6	quality stuff donkey, funny how you are so willing to lump one group together to suit your 'rant of the day' Such a pathetic little hater.~	Negative	No	No	No	No	No		No
	AB	17	harcur	2	0	12	24	You are wrong.Look what happened in the last election. The Cons said be very afraid of the WRP and people were very afraid. Don't tell me most people can think and make rational desitions after what I saw in the last election.~2	Positive	No	No	No	No	No		No
	AB	17	416elenorRIGBYjustactingCASULL	3	0	8	8	This is just a pi$$ing contest now. On one hand, there is no good reason for this to not be included with all the other shots kids get at school. Promiscuity rates are not going to change because of a little prick in the shoulder (Behave yourselves). On the other hand anyone can walk into any Safeway Pharmacy and get it (No appointment neccesary).~Seems to me this is just another reason for peopl…	Positive	No	No	No	No	No	3	No
	AB	17	mgrinas	3	0	2	2	Does Bishop Fred Henry have the qualifications to make that call?~Is he a graduated doctor?~If he doesn't, and most likely is not, then why are supposed educated people listening to him? ~3	Positive	No	No	No	No	No		No
	AB	17	murrayw	2	0	1	1	Don't worry about what the Catholics want, lets just bully them into complience.~2	Neutral	No	No	No	No	No		No
	AB	17	justsayno	1	0	46	52	By Health Canada's own admission if this cancer can be caught early enough, it can be cured. The 360 women who die from it every year in Canada, did not have annual or bi-annual pap tests until it was too late. Considering Gardasil has Polysorbate 80 in it which causes infertility in rats, are you sure you know what you're talking about?~1	Negative	No	No	No	No	No		Yes
	AB	17	ScottSOT	4	0	11	11	Adding to studies, I can make the argument that all studies illustrate parents feel thay are the ones responsibile and ultimately accountable for the safety and well being of their children. (Even the most socialist of the socialist social workers believe that to be true.) Regardless of HPV studies, Bishop Henry's position, community health sciences or other so called experts, the fact is: people…	Negative	No	No	No	Yes	No	1	No
	AB	17	AmandaCody	1	0	2	2	It is the barbaric reasons behind the Catholic Church that has driven so many followers away... I consider myself a Christian, but being raised a catholic as a child I was thankful to abandon their selfish ignorant ways when the choice became my own...~It appears the only ones allowed to have sex before marriage if you're catholic, are the priests! And like some other religions, if it has to do w…	Positive	No	No	No	No	No		No
	AB	17	b3n_34y3ars	1	0	17	23	So you didn't like being Catholic, and you left the religion and are very bitter about~the Catholic church.....~that was your choice. Others don't feel the same way as you do,~and that's their choice. I also didn't know the Taliban shooting the young girl were Catholics. You're so full of it......knowledge that is.~1	Negative	No	No	No	Yes	No		Yes
	AB	17	Biggus_Dickus1	0	0	1	2	Catholic Church - what a gong show~	Positive	No	No	No	No	No		No
	AB	17	b3n_34y3ars	1	0	18	23	....to each their own, don't like it don't become a member.~1	Negative	No	No	No	Yes	No		Yes
	AB	17	harcur	0	0	13	24	They are just a cult for people who think they are better but yet are more intolerant to the suffering people of the world.~	Positive	No	No	No	No	No		No
	AB	17	b3n_34y3ars	0	0	19	23	What's it like being an expert? You're just loaded with intelligence and knowledge about everything,eh?~Bet you're really wealthy, giving everybody all that advice.~	Negative	No	No	No	Yes	No		Yes
	AB	17	Biggus_Dickus1	0	0	2	2	if anybody has the title "bishop" in front of their name then they're not qualified to competently comment on any subject~	Negative	No	No	No	No	No		No
	AB	17	Hammertime_IN_AB	0	0	6	6	good call, no educated catholics out there. sheesh~	Negative	No	No	No	No	No		No
	AB	17	calgaryoverrated	0	0	14	14	What amazes me is the lack of Knowledge of the disease! I have had HPV and was diagnosed at 28 with Cervical Cancer! The catch is the disease can be contracted in many ways... Unsanitary conditions, Not washing hands before going to the washroom, Multiple sex partners and several more... Before the media or church speaks they should look at all the facts! There are germs everywhere and women are …	Positive	No	No	Yes	No	No	3	Yes
	AB	17	b3n_34y3ars	3	0	20	23	Science gave women Diethylstilbestrol (DES) , Five to ten million women have used it.More than 30 years of research have confirmed that health risks are associated with DES exposure,breast cancer and vaginal cancer among the health risks. Science gave women thalidomide,It is not known exactly how many ~worldwide victims of the drug there have been, although estimates range ~from 10,000 to 20,000 …	Negative	No	No	No	Yes	No	1	Yes
	AB	17	harcur	0	0	14	24	Its only the holy prick in Calgary that does not want his students to have it. Edmonton seems fine. Where is the problem.~	Positive	No	No	No	No	No		No
	AB	17	b3n_34y3ars	0	0	21	23	You're willing to give this vaccine to your daughter? That's your option. I wouldn't let my daughter go near that needle for anything, on grounds~there is not enough long term evidence to totally prove it is ~safe for her or her unborn children. ....and show some respect for the Bishop, he's not related to you.~	Negative	No	No	No	Yes	No		Yes
	AB	17	justsayno	2	0	47	52	Published online on September 24,1 a systematic review of~pre- and post-licensure trials of the HPV vaccine by a Canadian team shows that~its effectiveness is not only overstated (through the use of selective~reporting or "cherry picking" data) but also completely unproven. The summary states it quite clearly: "We carried out a systematic review of HPV vaccine pre-~and post-licensure trials to as…	Negative	Yes	No	No	No	No	1	Yes
	AB	17	harcur	0	0	15	24	Published on line. Why don't you look at a few studies not done by religious groups directly related to the church and you will find that they suggest something very different.You are a liar and you should be charged with spreading a false truth. That was not a clinical study. It was the churches paid scientists. LIAR.~	Positive	No	No	No	No	No		No
	AB	17	justsayno	0	0	48	52	The review was done by the Department of Ophthalmology and Visual Sciences at the U of BC. Lol churches paid scientists.~	Negative	No	No	No	No	No		Yes
	AB	17	KennGG	2	0	1	1	The Bishop isn't thinking clearly, HPV isn't just transmitted sexually and even if you wait till marriage to have sex, if your partner didn't your still at risk.~Unfortunately my daughter's vaccination cost us almost $500 for the 3 shots thanks to this backward attitude(something not everyone can afford, especially if you have several children)~This is a public health issue and if the Catholic Sc…	Positive	No	No	No	No	No	2	Yes
	AB	17	Steve Aspenlieder	0	0	1	1	This is not Catholic doctrine. THIS IS ALL BISHOP HENRY. This guy does not represent god in anyway shape or form. Henry thinks raising money via bingo is evil. Whatever. He should be investigated and removed from his post. His hang ups about life date back to his childhood and is now abusing his position. It would be great to interview the people who knew him growing up to find the real source of…	Positive	No	No	No	No	No		No
	AB	17	harcur	0	0	16	24	He's a freaking nutcase.~	Positive	No	No	No	No	No		No
	AB	17	b3n_34y3ars	0	0	22	23	Don't like the Bishop ? Then don't go to his church. Yo Dog,what were your early life experiences that ~made you an authority on early life experiences. Yours obviously shaped you into what you are.~Too bad you can't go back and fix it,eh? ~	Negative	No	No	No	Yes	No		Yes
	AB	17	StevenAspenlieder	0	0	4	5	Not man enough to use your real name then why are you blogging on here? MAN UP little boy. One hides behind a cloth, the other behind fake web names. Looks like a pair of losers to me.~	Positive	No	No	No	No	No		No
	AB	17	b3n_34y3ars	0	0	23	23	you're doing all the insulting here....go see Bishop Henry and tell~him to his face, big man on campus uses the newspaper to boost his ego.~	Negative	No	No	No	Yes	No		Yes
	AB	17	StevenAspenlieder	0	0	5	5	Nobody but nobody has access to your highness. However if I did it would be one of tbe worst moments of his life. This man has never had to face questions in his life. He says and you do. Thats how he operates. And yeah you calling me big man on campus in no way marginalizes what I have said as you cannot meet argument with argument. EVER~	Positive	No	No	No	No	No		No
	AB	17	Jim_knuckles	1	0	7	8	See Harcar the racist, that's another point your missing. Before she and her husband gets married he will see a doctor and be tested for all none sexually transmitted diseases. HPV is nothing compared to some of the diseases that can be contracted so both should always be tested.~1	Negative	No	No	No	No	Yes		No
	AB	17	Jim_knuckles	1	0	8	8	See Harcar the racist, that's another point your missing. Before she and her husband gets married he will see a doctor and be tested for all know sexually transmitted diseases. HPV is nothing compared to some of the diseases someone can get so both should always be tested.~1	Negative	No	No	No	No	Yes		No
	AB	17	Johndilinger	1	0	9	12	See Harcar, that's point your missing. Before a woman and man get married they will see a doctor and be tested for all known sexually transmitted diseases. HPV is nothing compared to some of the diseases individuals can get so both should always be tested.~1	Negative	No	No	No	No	No		Yes
	AB	17	Johndilinger	1	0	10	12	See Harcar the racist, that's another point your missing. Before she and her husband gets married he will see a doctor and be tested for all know sexually transmitted diseases. HPV is nothing compared to some of the diseases someone can get so both should always be tested.~1	Negative	No	No	No	No	No		Yes
	AB	17	Johndilinger	1	0	11	12	See Harcar, that's point your missing. Before anyone gets married they will see a doctor and be tested for all known sexually transmitted diseases. HPV is nothing compared to some of the diseases someone can get so both should always be tested.~1	Negative	No	No	No	No	No		Yes
	AB	17	Johndilinger	1	0	12	12	See Harcar, that's point your missing. Before anyone gets married they~will see a doctor and be tested for all known sexually transmitted ~diseases. HPV is nothing compared to some of the diseases someone can ~get so both should always be tested. ~1	Negative	No	No	No	No	No		Yes
	AB	17	caribbean3	0	0	2	2	Yes, the church has such a fine history of moral values. How many innocent, young children were violated by the priests/nuns, the church knew, yet chose to ignore the complaints. Why should anyone listen to their guidance today?~	Positive	No	No	No	No	No		No
http://www.calgarysun.com/2012/10/25/calgary-catholic-school-district-board-pass-motion-to-consult-with-parents-about-hpv-shot	AB	18	Geek Man	1	0	4	4	They'll keep asking till they get the answers they want. Testing to failure is a method used by abusers.	Positive	No	No	No	No	No		No
	AB	18	G_rant	0	0	1	2	Check Out truthaboutgardasil.org if you want to know the real dangers behind this vaccine.~	Negative	Yes	No	No	No	No		No
	AB	18	G_rant	0	0	2	2	Check out truth about gardasil dot org if you want to factor in the real dangers vs. the limited range of the effectiveness of this vaccine. Not what they will sell you.~	Negative	Yes	No	No	No	No	1	No
	AB	18	maladr01t	3	0	1	1	Oh God....loosen the tin foil hat!~3	Positive	No	No	No	No	No		No
	AB	18	ihgfedcba	3	0	62	62	The polio vaccine only had limited effectiveness too. It was limited to wiping out the disease entirely.~3	Positive	No	No	No	No	No		No
	AB	18	harcur	0	0	17	24	Which truth do you want? There are several other studies that say it is very safe.If I wanted to say the earth is flat I could probably find a scientific study somewhere in the world that agrees with me.~	Positive	No	No	No	No	No		No
	AB	18	JohnathanGalt	2	0	26	37	The Bishop needs to fire these "trustees" and take the Catholic school system away from the clutches of the meddling socialist government.~2	Negative	No	No	No	No	No		No
	AB	18	sharpie.david	4	0	1	1	Yes, preventing viruses is socialism......... 4	Positive	No	No	No	No	No		No
	AB	18	scottsatrollingrat	2	0	11	11	madmen hide behind the cross. we should pull all goverment funding from all religious schools.~2	Neutral	No	No	No	No	No		No
	AB	18	JohnathanGalt	2	0	27	37	Socialism is forcing people to act against their beliefs in the name of fulfilling the government's agenda. Those who want to use experimental vaccines on their children are free to do so at other locations.~2	Negative	No	No	No	No	No		No
	AB	18	harcur	1	0	18	24	My tax dollars help pay for that location so I get a say just the same as you. The day the church pays the whole shot that is the day they can make all the decisions.~1	Positive	No	No	No	No	No		No
	AB	18	JohnathanGalt	3	0	28	37	People who allocate their school taxes to the catholic system are the ones who get a say. Those who allocate their school taxes to the public schools don't get a vote on a system they don't fund.~3	Negative	No	No	No	No	No		No
	AB	18	harcur	1	0	19	24	the government takes a percentage of everyones taxes and gives it to the Catholic school board because there are not enough fund to give them a proper education with just catholics paying the shot~1	Positive	No	No	No	No	No		No
	AB	18	JohnathanGalt	0	0	29	37	How about if the people who actually pay the lion's share of the taxes get the lion's share of the say?~	Negative	No	No	No	No	No		No
	AB	18	harcur	1	0	20	24	That’s fine by me,they can say I don’t want my child to get the shot.The parents who want their to get it can send them to school with a note or signed form saying my child will get the shot .When they announce it those who want it go to a classroom and get it.Easy.~1	Positive	No	No	No	No	No		No
	AB	18	Sporto100	2	0	1	1	What proof do you have that vaccinations prevent anything? There is none. This HPV "scare" is being perpetuated by the pharama companies. It is all about making money. Using children to tug at the ol human heart strings. Even the CDC says on their web site that the 33,000 identified HPV-cancers are "potentially associated with HPV". Seriously? You would inject your child with mercury and who else…	Negative	Yes	No	No	No	No	1	No
	AB	18	titan715	0	0	1	1	Want proof? One word: Polio~	Positive	No	No	No	No	No		No
	AB	18	girlposter	1	0	3	3	the bishop would sooner have the young ladies remain pure and die from a nasty cancer than have any alleged improprieties going on under his watch (the men) get a free pass......they are the ones passing on the cancer,,,,,and the ones that should be wearing a chastity belt.~1	Positive	No	No	No	No	No		No
	AB	18	JohnathanGalt	0	0	30	37	They are free to get their experimental HPV shots at another location. If this goes ahead, I suppose once it comes out that the shots are actually harmful, people will then want to sue the Catholic schools for allowing the shots on their property, right?~	Negative	No	No	No	No	No		No
	AB	18	harcur	0	0	21	24	They are not free to get them at another location.I know what you meant but could'nt resist.They are free if the students get them through the school system.They are quite expensive{I'm not sure the exact amount} if you get them at a Safeway or drugstore. Why should a single Catholic mother working to support say, 3 girls on a fixed income have to inccure the cost to protect her girls when public…	Positive	No	No	No	No	No	3	No
	AB	18	JohnathanGalt	0	0	31	37	Why should my money be stolen from me and handed to big pharma so that they can sell experimental vaccines to the gullible?~	Negative	No	No	No	No	No		No
	AB	18	harcur	0	0	22	24	Now you have lost it. Come up with something realistic.~	Positive	No	No	No	No	No		No
	AB	18	JohnathanGalt	0	0	32	37	Really? Take a look at what happened in Texas.~	Negative	No	No	No	No	No		No
	AB	18	harcur	1	0	23	24	The trustees need not have asked what the bishop thinks because he is a senile old man stuck in the 1600s in his archaic brain.Good for the trustees.If you don't want you daughter protected don't have her get the shot.~1	Positive	No	No	No	No	No		No
	AB	18	JohnathanGalt	0	0	33	37	And will the trustees agree to sign-on to the future liability for the lawsuits that will arise once the experimental HPV vaccine is shown to be harmful?~	Negative	No	No	No	No	No		No
	AB	18	harcur	0	0	24	24	I just said if you don’t want your daughter to get the shot,don’t let her get the shot. Why would someone sign if the person getting the shot is getting it volintarily?~	Positive	No	No	No	No	No		No
	AB	18	JohnathanGalt	0	0	34	37	That won't stop the lawsuits when the cancer and infertility clusters among the inoculated start showing up in 5 or 10 years.~	Negative	No	No	No	No	No		No
	AB	18	newshound74	1	0	1	1	The HPV Vaccine is in fact free at the health clinics...where all of the childhood vaccincations are given. At my Dr's office the shots were about 185 each...and there are 3 of them. So that would get pricey. As for the vaccination being dangerous...I appreciate your opinion, but I disagree. As a parent of a young teenager in the Catholic system, I consulted with our family Dr...as well as did my…	Positive	No	No	No	Yes	No	2	Yes
http://www.calgarysun.com/2012/07/03/letters-to-the-editor-july-4-3	AB	19	SuperLogic	3	0	13	23	So should the Catholic Church be responsible for handing out condoms and birth control pills as well? How is that any different?	Negative	No	No	No	No	Yes		No
	AB	19	Guest 1	4	0	1	4	completely different but yes they should do what they can to prevent the spread of diseases and allow the woman a right to decide to have a baby or not~4	Positive	No	No	No	No	No		No
	AB	19	SuperLogic	7	0	14	23	So why should the Catholic church be going against their beliefs?? Should you be forced to go against your conscience?? The Catholic Church isn't stopping anyone from going to get it, they just aren't providing it. It is absurd to force the church to go against their conscience and provide birth control, condoms, and abortion funding (which they are trying to do in the US). What happened to PERSO…	Negative	No	No	No	No	Yes		No
	AB	19	Guest 1	3	0	2	4	OK fine the church doesn't believe in stopping the spread of disease or allowing women a choice without berating and threatening to throw them out . The teaching of the Bible says no such thing , The conscience of the church is only when it serves them. Ask the church to be responsible and you get a dirty look ~3	Positive	No	No	No	No	No		No
	AB	19	Guest 1	3	0	3	4	the church it's self does not fund anybody or anything . They are a bunch of self serving neanderthals~3	Positive	No	No	No	No	No		No
	AB	19	Oscar Owens	1	0	2	4	It is absurd to force the church to go against their conscience and ~provide birth control, condoms, and abortion funding (which they are ~trying to do in the US) Ah yes, the 'Conscience' that is entirely derived from what was written by ordinary men in a book thousands of years ago. This isn't what you'd call 'Conscience'. Rather, it's being told explicitly how to think and behave. 'Conscience' …	Positive	No	No	No	No	No		No
	AB	19	SuperLogic	1	0	15	23	Well, Oscar, first off I am not Catholic, and no one tells me what to think or do against my own free will. What would I do? I would tell my daughter not to rely on band aid solutions to complex issues. These vaccines do little to protect daughters against most STD's, not to mention psychological issues, unwanted pregnancies, abortions, etc, etc. You fail to look at the big picture, along with th…	Negative	No	No	No	No	Yes	1	No
	AB	19	SuperLogic	4	0	16	23	Actually they DO believe in stopping the spread of disease. You (and others) just disagree on how to go about this. It's not like people don't know that promiscuity is the cause of STD's, but they decide to do it anyway. This vaccination is not going to prevent the spread of most of the STD's, and condoms are not effective for the transmission of STD's. There is no such thing as SAFE sex, only SA…	Negative	No	No	No	No	Yes	1	No
	AB	19	Guest 1	3	0	4	4	the truth is the bosses at the Vatican DONOT FUND CHARITIES , That my boy is left up to indivual church workers not the greedy guts bosses of the church. I wonder if they marry alter boys first~3	Positive	No	No	No	No	No		No
	AB	19	leftofche	3	0	1	3	The issue with this medicine is what if all those virginal girls marry men who haven't been perfect, not that hard to imagine, they still die and those "sinning men" still live. That's why many see this catholic position as anti-women more than pro-chastity.~3	Positive	No	No	No	No	No		No
	AB	19	SuperLogic	1	0	17	23	leftofche, so who do these men have sex with if the girls are saying "no"? Each other?? Sheep?? And the problem with your logic is that these "sinning men" get STD's too, it's not like they are immune to them. How is it an anti-woman stance?? Your statement makes no sense! And again, this vaccine eliminates only 1 or 2 types of STD's, it still leaves them open to many others, including AIDS. And …	Negative	No	No	No	No	Yes	1	No
	AB	19	leftofche	1	0	2	3	Super, you say it's not anti-woman, but have you ever wondered why the vatican has OKed condoms for homosexual prostitutes, and no one else? Could it be that so many priests frequent them? My problem with most religious rules is they all just, by strange coincidence seem to favour the religious leaders and punish women.~1	Positive	No	No	No	No	No		No
	AB	19	SuperLogic	2	0	18	23	leftofche.... actually no, I can't say I've ever wondered about that, and to tell you the truth, I wasn't even aware of that. But if it is true, I would imagine it's because homosexual sex has absolutely nothing to do with procreation, whereas they feel that hetrosexual sex between a husband and wife is primarily about Procreation. The thing is, while any of the abuse of priests is absolutely una…	Negative	No	No	No	No	Yes		No
	AB	19	SuperLogic	1	0	19	23	Truth?? You obviously just have an axe to grind, and aren't even interested in "truth".~1	Negative	No	No	No	No	Yes		No
	AB	19	garyrock99	1	0	27	30	The Catholic Church provides more aid to the poor then any Gov't ever will and you day they fund nothing? Your a loser with no facts to back your mouth.~1	Negative	No	No	No	Yes	No		No
	AB	19	mikemanchester81	2	0	2	8	The Catholic Church should not be taking tax money to run schools.~2	Positive	No	No	No	No	No		No
	AB	19	SuperLogic	0	0	20	23	Then the government should not be taking money from Catholics to run schools. Catholics pay taxes like everyone else. Do you think only atheists pay taxes??~	Negative	No	No	No	No	Yes		No
	AB	19	mikemanchester81	2	0	3	8	No, we all pay taxes. I don't think the government should have seperate buckets of money for the education of children whose parents have different religions. Our province shouldn't have government funded islamic shools or jewish schools either.~2	Positive	No	No	No	No	No		No
	AB	19	SuperLogic	0	0	21	23	If a person is paying taxes for schools, and he doesn't agree with what the public school system is teaching, and he sends his child to a private school, or a specialized school ie French immersion, or special needs, should they have to pay double?? All sorts of schools receive public funding, or is it just faith based schools that your are against subsidizing??~	Negative	No	No	No	No	Yes		No
	AB	19	mikemanchester81	0	0	4	8	SuperLogic:~There is a big difference between a special needs school and a faith based school. It makes sense for us to accommodate children with special needs. It's a matter of delivery of education, not a change in content based on religious or cultural preference. Ideally these special needs programs can be a part of a community school, but it is more practical to house these programs is a sep…	Positive	No	No	No	No	No		No
	AB	19	SuperLogic	1	0	22	23	Is "Wrong"?? What makes it "wrong"? Because YOU don't agree with it?? They are paying their taxes like anyone else, why can they not use it to provide their own schooling? They are not taking a dime away from others in public schooling. If they went to public schooling, the money would be used there. The same amount of funds are being used for the same amount of students which would need more pub…	Negative	No	No	No	No	Yes		No
	AB	19	mikemanchester81	0	0	5	8	Why is it wrong? 1) They are taking money from the public system. Every tax dollar that goes to the seperate system does not make it to the public system. This isn't necessarily in proportion to students. It's property tax, not tuition. Any property owner can designate one system or another. Having school aged children doesn't make a difference. Funding can get out of whack very easily. 2) Having…	Positive	No	No	No	No	No		No
	AB	19	garyrock99	0	0	28	30	The choice is up to the Taxpayer which board they fund. but of course a no mind like you wouldn't bother to check.~	Negative	No	No	No	Yes	No		No
	AB	19	mikemanchester81	1	0	6	8	I am well aware. As I stated already, "I don't think the government should have seperate buckets of money for the education of children whose parents have different religions"~1	Positive	No	No	No	No	No		No
	AB	19	JohnathanGalt	0	0	35	37	There should be no tax-funded schools, period.~	Negative	No	No	No	No	No		No
	AB	19	leftofche	1	0	3	3	Speaking of the catholic church, they were overjoyed to report a theft and fraud scandal today, finally, something to take our minds off the child rape scandals.~1	Positive	No	No	No	No	No		No
	AB	19	JohnathanGalt	3	0	36	37	The Catholic Church deserves to be severely criticized and penalized for not weeding out the pedophiles and for not having them jailed (or worse). However, what about the many more pedophiles in the public school system, and in child protective services, and in the foster care system, and in the Boy Scouts, and in the health-care system, and so on and on? Seems that all these other "venues" that …	Negative	No	No	No	No	No		No
	AB	19	Guest 2	0	0	1	1	You haven't a clue LOL~	Positive	No	No	No	No	No		No
	AB	19	SuperLogic	0	0	23	23	Well, YOU obviously don't since you can't even answer it! :oP~	Negative	No	No	No	No	Yes		No
	AB	19	mikemanchester81	2	0	7	8	The Church lost its moral position when it facilitated the rape of hundreds (maybe thousands) of young boys. If we look further back we see the church has frequently propped up tyrants (including most fascists governments) and have been the center of incredibly violent wars.~ ~Why are tax payers giving money to these people?~2	Positive	No	No	No	No	No		No
	AB	19	garyrock99	0	0	29	30	Why do you care about schools when it's obvious you never went.~	Negative	No	No	No	Yes	No		No
	AB	19	mikemanchester81	1	0	8	8	You got me, gary.~1	Positive	No	No	No	No	No		No
	AB	19	garyrock99	0	0	30	30	I can't take much credit, It was too obvious.~	Negative	No	No	No	Yes	No		No
	AB	19	JohnathanGalt	1	0	37	37	Why are taxpayers giving money to anybody? Answer: They aren't giving it, it's being stolen from them and handed over by the socialist freeloaders in the government, who keep a hefty chunk of the money for themselves. Stop all tax-theft.~1	Negative	No	No	No	No	No		No
	AB	19	Ann Nonomass	0	0	3	3	people people people if parents are freaked out by their little sexual monsters,~let me remind everyone we live in Canada still, and the clinic is down the street, or let me introduce you to this thing called a telephone and call your doctor so the three of you can chat~(single parents seem to be the norm - if there's a fourth GRATS!) but please let the schools teach what's left of their butchere…	Neutral	No	No	No	No	No	3	No
	AB	19	Oscar Owens	1	0	3	4	Garyrock99: Dude, all you ever do is call people 'loser' or other ridiculous, childish names. Y'know, they say people who continually put other people down are the ones with self esteem issues. Are you happy with yourself, Gary? Do you feel adequate? There are people who can help you learn to love yourself, Gary. Just reach out...	Positive	No	No	No	No	No		No
	AB	19	Oscar Owens	0	0	4	4	JonnyGalt: So, you think everyone should pay for the 'privilege' of education? Not surprising. Clearly, you believe a dull-witted and ignorant society is a productive one. I know, I know. You have a real problem with being part of a society that actually cares about one another. I get it. We all get it, Jonny. You don;t like sharing, helping others and giving a damn about the people you share thi…	Positive	No	No	No	No	No		No
http://www.calgarysun.com/2012/06/30/platt-serious-ethical-flaw-exposed	AB	20	JFT2	4	0	1	1	What Henry has once again demonstrated is what the RCC thinks of women -- they should leave control over their bodies to celibate men, and if a few women die in the process, well that's just what they get for having sexual relations...ever. Because remember, this vaccine is for life. Oh, yeah, and a celibate man also knows better than parents what is best for the children. After everything that h…	Positive	No	No	No	No	No		No
	AB	20	pacing polly	3	0	1	1	this is why I have turned my back against the catholic church..the hypocrisy made me gag..I've seen so called great catholics.. who some some people would consider next to saint hood (male and female) that repent on sunday and screw and gouge their family ,friends and neighbour all week long and then get redeemed on the following sunday.. like taking a shower washing all their sins away..maybe bi…	Positive	No	No	No	No	No		No
	AB	20	Socrates42	2	0	1	1	Is this the same bishop who ordered Calgary's Catholic teachers not to contribute money to any charitable organization which was providing family planning info, birth control pill for women, and condoms for men in third world countries? If they ignored his warnings, they could lose their jobs and possibly face ex-communication. Nice guy, eh? The church has lost its moral authority since it has be…	Positive	No	No	No	No	No		No
http://www.edmontonsun.com/2012/10/15/hpv-vaccine-doesnt-make-young-girls-more-promiscuous-study	AB	21	Tempusfugit	1	0	1	1	Personally in my own research I found that those religious girls that come to university away from the direct restrictions & influence of parents and church and it doctrines. These young girls come to university and in a very short period of time and with the right guidance & support, many of these deprived girls lose their contempt prior to investigation doctrine :)	Neutral	No	No	No	No	No		No
	AB	21	Shelby Mack	1	0	1	1	Your comment is very unclear.	Neutral	No	No	No	No	No		No
	AB	21	Justsayno	0	0	49	52	Published online on September 24,1 a systematic review of pre- and post-licensure trials of the HPV vaccine by a Canadian team shows that its effectiveness is not only overstated (through the use of selective reporting or "cherry picking" data) but also completely unproven. The summary states it quite clearly: "We carried out a systematic review of HPV vaccine pre- and post-licensure trials to as…	Negative	Yes	No	No	No	No		Yes
	AB	21	allaboutfun	0	0	1	1	A hero's salute to whoever does come up with the vaccine that makes them promiscuous!...or is that just called lemon gin?	Neutral	No	No	No	No	No		No
	AB	21	Matt Armstrong	0	0	1	1	It's fear mongering, and uninformed ranting from the clueless and the religious groups that leads people to believe that the HPV vaccine would help prevent STIs and pregnancy. Maybe if people would do more research before ranting wildly. Vaccines are a benefit to our health. I received the Heb-B vaccine in elementary school, and have received the flu shot in school and from my employer before. No…	Positive	No	No	No	No	No	2	No
	AB	21	Justsayno	0	0	50	52	There is no evidence that the HPV vaccine stops cancer since 90% of women will fight this virus off within two years on their own. By Health Canada's own admission this cancer can be cured if caught early enough so who really needs a vaccine?	Negative	No	No	No	No	No		Yes
	AB	21	William_gamm	0	0	1	3	You would not make every effort to protect the life of a child because you don't feel like using a vaccine? You don't see something very wrong with this?	Positive	No	No	No	No	No		No
	AB	21	Justsayno	0	0	51	52	Look, I'm not against vaccines, only the ones that aren't proven to be effective. Like this HPV vaccine. Unlike yourself I've been following the progression of it since it was released in the states in 2006 because I knew the culture of the pharmaceutical companies, if wouldn't be long before it was available in Canada. Nothing I've heard or read has changed my mind about it since it's inception.…	Negative	No	No	No	No	No	2	Yes
	AB	21	William_gamm	0	0	2	3	So your OK with a %10 infection rate?	Positive	No	No	No	No	No		No
	AB	21	Justsayno	0	0	52	52	With annual or bi-annual pap tests? Absolutely.	Negative	No	No	No	No	No		No
	AB	21	William_gamm	0	0	3	3	Just another example of where religion imposes it's foolish beliefs on society no matter how dangerous and stupid the consequenses may be. The albertan RC archbiship should be ashamed of himself and held personally responsible for any health related issues caused by his actions.	Positive	No	No	No	No	No		No
	AB	21	6942645	0	0	1	1	Seatbelts don't make people drive faster, either. If there are issues with the HPV vaccine increased promiscuity certainly isn't one of them.	Positive	No	No	No	No	No		No
http://www.edmontonsun.com/2012/09/13/proponents-may-sue-calgary-catholic-school-board-over-hpv-vaccination	AB	22	Drew Wakariuk	3	0	1	1	When will they start forcing the parents to do it as well? Sorry but forcing this is an act of dictatorship. When they create an aids vaccine will it be forced in any way? I highly doubt it.	Negative	No	No	No	No	No		No
	AB	22	Gram3	1	0	1	1	$$$ Big pharma at it again? What! No cure for cancer yet? Cures aren't profitable. Human Papiillomavirus (HPV) is one of the most common sexually transmitted infections in 'sexually' active people, both male and female. They may contract HPV at least once in their lifetime the experts tell us. But , most of those infections go unnoticed because a healthy immune system will clear itself of the vir…	Negative	No	No	No	No	No		No
http://www.torontosun.com/2012/10/15/hpv-vaccine-doesnt-make-young-girls-more-promiscuous-study	ON	23	Charley33	0	0	1	1	Of course it doesn't. The real threat was to religious men who fear the loss of control over "their" women; it was the same with the pill.	Neutral	No	No	No	No	No		No
	ON	23	Taebok	0	0	1	1	That's a shame. Is there a vaccine that does?	Neutral	No	No	No	No	No		No
	ON	23	hardworkinalbertan	0	0	1	1	They are talking about people 9-13 people could take your comment the wrong way teabag. I get it , just breaking your balls a little	Neutral	No	No	No	No	No		No
	ON	23	David_McNamara	0	0	1	1	"Contrary to the concerns of some parents, religious groups and others, the HPV vaccine doesn't lead girls to have more sex, according to a study published online Monday in the journal Pediatrics." What do we expect from the same lot who figure condoms and other contraceptives also promote promiscuous behaviour?	Positive	No	No	No	No	No		No
	ON	23	poopy_pants	0	0	1	1	well duh	Positive	No	No	No	No	No		No
	ON	23	Kandastan	0	0	1	2	Now, if only they could develop a vaccine that would make girls more promiscuous, I think we could all live with that, eh boys?	Neutral	No	No	No	No	No		No
	ON	23	Kandastan	0	0	2	2	Yeah, but when those 9-13 olds grow up......:-)	Neutral	No	No	No	No	No		No
	ON	23	nimble_jack	0	0	1	2	delete	Neutral	No	No	No	No	No		No
	ON	23	nimble_jack	0	0	2	2	"I'd buy that for a dollar".	Neutral	No	No	No	No	No		No
	ON	23	Andia Taimi	0	0	1	1	Student parents should have a choice to take or not to take. They can not be misguided about benefits of that vaccine. They have to be informed about side effects which ruin health of many kids. I do not support vaccination of young beings with this toxic product.	Negative	No	No	No	No	No	1	No
http://www.torontosun.com/2012/01/31/family-sues-after-teen-dies-following-hpv-vaccination	ON	24	Tom Langstorm	0	0	2	3	So the coroner could not establish a direct link between the vaccination and the girl's death, but the coroner had to list something as the cause of death. There is too much missing here, but if a family is taking on a pharmaceutical giant, good luck with that. Being misdiagnosed at a hospital will not be too easy to prove either. Condolences for a young life lost unneccesarily.	Negative	No	No	No	No	No		No
	ON	24	Huyie	0	0	1	1	Canadian researchers Lucija Tomljenovic, PhD, and Christopher Shaw, PhD, from the Neural Dynamics Research Group, University of British Columbia, in Vancouver, point out that there is a major discrepancy in claims regarding the safety and efficacy of Gardasil (Merck & Co) and Cervarix (GlaxoSmithKline) — the 2 HPV vaccines that are currently on the market. Source: HPV Vaccine Policy: At Odds With…	Negative	Yes	No	No	No	No		No
	ON	24	Paul	0	0	1	1	herpesdateonline.c o m --The best, most trusted and largest dating site for black people who with STD in the world! There will be lots of potential soulmates . The site offers live STD counseling, STD questions and answer,member verification (age, income, etc), member blogs, chatting services and more.	Neutral	No	No	No	No	No		No
	ON	24	Guest	0	0	1	1	What's sickening is that when we raise legitimate safety concerns about fluoride and vaccines, the media marginalizes and even ridicules us. It's no secret that doctors (both Canadian and American) are on the payroll of drug companies. As far as the media is concerned, if drug ads disappeared from print media and television, the bull sh!t media would go out of business overnight. So do you think …	Negative	No	No	No	No	No		Yes
	ON	24	Melanie Scott	0	0	1	1	Let's look at the last comment in this "article" [ None of the allegations in the lawsuit have been proven in court.] Of course its not been proven in court... the case is just heading there... there are however other cases which have been proven in court and I can't wait to see how this one turns out.. Unfortunately there will be a gag ordered issues which would prevent the outcome from being ma…	Negative	No	No	No	No	No		No
http://www.torontosun.com/2012/09/13/proponents-may-sue-calgary-catholic-school-board-over-hpv-vaccination	ON	25	Brenda2600	0	0	1	1	If it works why are the boys NOT TAKING THE VACCINATION. That is where the problem lies. LEAVE THE CATHOLICS ALONE.	Negative	No	No	No	Yes	No		No
	ON	25	Andy Engel	0	0	1	1	Because they don't get cervical cancer...	Positive	No	No	No	No	No		No
	ON	25	Nomorefalsegods	0	0	1	1	Risking womens health again, enough already.	Positive	No	No	No	No	No		No
	ON	25	19073243	0	0	1	1	The board said it takes much of its direction on the issue from Alberta’s Roman Catholic bishops who view use of the vaccine -- which prevents sexually-borne cervical cancer -- as an invitation for teen girls to become promiscuous. What a bunch of morons, The Catholic Church is just plain outdated and useless, kids are having sex at an earlier age regardless of their faith,,,someone needs to give…	Positive	No	No	No	No	No		No
	ON	25	Nite_owl	0	0	1	1	Bishop Henry and his Calgary Taliban are a disgrace and should be sued into the poorhouse.	Positive	No	No	No	No	No		No
	ON	25	Tina	0	0	1	1	"that stance isn’t even one held by the Vatican or Canadian bishops as a whole." One of the problems with all religions - everyone chooses their own rules regardless of the actual churches position	Positive	No	No	No	No	No		No
	ON	25	chuckinchina	0	0	1	1	Let's put more vaccines into our children. Maybe they can combine the flu shot and the HPV all in one and really give these girls a big vaccine dose. I mean look how effective the flu shots have been . One person concerned about the HPV vaccine says that there are 13 strains of the virus but the vaccine only "protects " against 4.	Negative	No	No	No	No	No		No
	ON	25	Tom Langstorm	0	0	3	3	Too bad the bishops aren't as worried about the alter boys as they are about the girls becoming promiscuous.	Negative	No	No	No	No	No		No
	ON	25	czion	0	0	1	1	The medical community kills more people than they save.	Negative	No	No	No	No	No		No
http://www.ottawasun.com/2012/10/15/hpv-vaccine-doesnt-make-young-girls-more-promiscuous-study	ON	26	Marvin77	2	0	1	2	Really? Are these people really that s t u p i d to think a vaccine would cause kids to become more promiscuous??? Wow, if a parent is against a vaccine that would prevent his or her child to get cancer then they shouldn't have a kid to begin with!!!	Positive	No	No	No	No	No		No
	ON	26	DeMoness	1	0	1	1	Yes, people are that stupid!	Positive	No	No	No	No	No		No
	ON	26	von	0	0	1	1	This vaccine does not prevent or "WOULD" prevent cancer , it "COULD" prevent cancer in a female who got a STI from having unprotected sex	Negative	No	No	No	No	No		No
	ON	26	Marvin77	0	0	2	2	Thank you for correcting my post! Do you feel better now? I don't recall asking you to clarify how this vaccine works but I guess a "know-it-all" like you always feels the necessity to show off so he or she can feel smarter...Good job!	Positive	No	No	No	No	No		No
	ON	26	dumpmanagers.manager	1	0	1	1	What!?!? Are you serious? This was a study!? Why don't you also study why people who get a vacination for malaria go out and lick mosquitoes? Or, how about this, a vaccine for tetnus makes someone crave eating rusty nails..??	Positive	No	No	No	No	No		No
	ON	26	NotTooShabby	1	0	1	1	Yeah...also like sex ed would encourage kids to be more sexually active. These people should get their heads out of their arses and take a leap into reality!	Positive	No	No	No	No	No		No
	ON	26	gottaloveit81	0	0	1	1	the HPV vaccine doesn't lead girls to have more sex," damnit...	Neutral	No	No	No	No	No		No
http://www.cbc.ca/news/yourcommunity/2012/04/should-boys-have-access-to-free-hpv-shots.html	National	27	Anthony Hill	42	95	1	1	I'm extremely suspicious about what these drug companies are shooting into the bloodstreams of our young people. Extracts of various animal parts and other weird stuff should not end up in our bodies, IMHO. And there is the concern about mercury in vaccines too.	Negative	No	No	No	No	No		No
	National	27	clintonkr	15	29	1	3	Couldn't agree more, won't go near the stuff. As a 22 year old male not only do I have youth on my side but also an active, healthy lifestyle filled with whole raw foods and foods with unrefined/non-engineered ingredients I can actually pronounce! As a robust individual who seldom catches as much as a seasonal cold, I'M not putting anyone at risk by my choice not to vaccinate - those with unhealt…	Negative	No	No	No	No	No		No
	National	27	Required Fields	18	18	1	19	It sounds like you prefer to see young girls get cervical cancer than a vaccination. Way to go!	Positive	No	No	No	No	No		No
	National	27	clintonkr	7	16	2	3	Actually I don't support the risk of; Death: http://www.youtube.com/watch?feature=player_embedded&v=lCnmUp2sKiY Permanent disability: http://www.youtube.com/watch?feature=player_embedded&v=0gCVCP8BFrU And numerous other cases: http://www.youtube.com/watch?feature=player_embedded&v=TG3mWgsMt-A	Negative	Yes	No	No	No	No		No
	National	27	R.Reagan	6	4	1	3	Because youtube is one of the worlds most reliable sources............Seriously?	Positive	No	No	No	No	No		No
	National	27	Doctor R	67	30	1	11	If administering this vaccine to boys would lessen the rate of cervical cancer in girls, then what could possibly be the argument against it? Tea party types warn us about "weird stuff being shot into our bodies", but the reality is that all vaccines have to undergo rigorous tests before being adminstered to the human population. As for their cost- the cost of treating cervical cancer- never mind…	Positive	No	No	No	No	No	2	No
	National	27	Ted Smith	14	6	1	5	hpv also causes cancer in boys, you know "Doctor" R	Positive	No	No	No	No	No		No
	National	27	Doctor R	15	6	2	11	Sure Ted. That makes it twice as logical to administer the vaccine, doesn't it?	Positive	No	No	No	No	No		No
	National	27	Sir. Charles	11	23	1	5	Of course, now you people are starting to get it, it's NOTHING more than capitalization on injections by the pharmaceutical conglomerates. They're training them up to like injections, sure start them young.	Negative	No	No	No	No	No		No
	National	27	Nmawiid	8	5	1	2	So, in your mind the only reason we should give boys the vaccine is to protect girls? Protecting boys from cancer isn't reason enough?	Positive	No	No	No	No	No		No
	National	27	Doctor R	12	3	3	11	If only boys were being protected, I'd still argue in favour. This isn't a male versus female thing- it's a humans versus virus thing.	Positive	No	No	No	No	No		No
	National	27	awhLuh	43	85	1	1	I wouldn't let my daughter get the vaccine when her school was doing it ...it was gardasil and it was said, even by the school , that 'they' were putting a push on it, to get it into the kids before a competitor released its version of the same vaccine... that smelled fishy to me...it became about business, not public health. as long as there is another way around HPV and cervical cancer, such as…	Negative	No	No	No	No	No	1	Yes
	National	27	Doctor R	41	10	4	11	Regular pap screening can catch the disease once it's started. Vaccination prevents it from happening. That's cheaper, and more likely to lead to a healthy outcome.	Positive	No	No	No	No	No	2	No
	National	27	Shouldbdoinghw	21	10	1	1	As a 23 year old girl who was diagnosed with cervical cancer this year and has had regular pap tests since the age of 18 and was not sexually promiscuous, I fully support this vaccine for both genders. My mom had the same reaction as you and I really paid the price for that.	Positive	No	No	Yes	No	No	3	No
	National	27	spike16	10	13	1	1	Not sure why all the thumbs down on your comment. I am not anti-vaccination, but this is one I would NOT give my girls. I agree with your reasoning, it's NOT proven on many levels, unproven over a 5 year period which means re-immunizations, and can anyone say Vioxx? Merck Frosst.....A stellar pharmaceutical company? I think not! I choose not to put my trust in liars!	Negative	No	No	No	No	No		Yes
	National	27	AlexanderMehta	65	19	1	1	This is important, too many boys are contracting oropharyngeal cancers through oral sex and were not getting the attention this situation deserves. Vaccines have been a powerful force for good, they've been of amazing benefit to the human race in conquering scourges from smallpox to polio. People fear and are suspicious of things they don't understand, we should do a better job of informing the p…	Positive	No	No	No	No	No	2	No
	National	27	jimfrieson	74	17	1	1	Anything free for boys that was denied for girls would be challenged in court so fast it would make your curly locks spin. Why not free for both sexes?	Positive	No	No	No	No	No		No
	National	27	Nmawiid	13	6	2	2	Because equality only cuts one way in this country.	Positive	No	No	No	No	No		No
	National	27	MCRB1969	49	22	1	1	This is a no brainer. Currently females are taking the risks and responsibility while both sexes benefit. Of course it should be available to males and females.	Mixed	No	No	No	No	No		No
	National	27	Peter@Dragons	24	48	1	2	Nothing is for free. It is just a tax funded vaccine that offers little or no protection and has many serious side effects.	Negative	No	No	No	No	No		No
	National	27	shastymcnasty	12	5	1	1	Peter dragons?? Are you serious??	Positive	No	No	No	No	No		No
	National	27	DisplacedMaritimer	2	4	1	1	I don't know who "Peter@Dragons" is or whether he is serious or not, but he is 100% correct. These vaccines are not properly tested. They are riding on the laurals of vaccines that have been around for decades and have a proven track record as "proof" that they are safe "If vaccine X is safe, this one is too!". I wouldn't give this vaccine to my neighbor's yappy dog.	Negative	No	No	No	No	No		No
	National	27	6string	19	10	1	1	Yes, HPV is a particularly nasty virus that causes cancer in humans. This vaccine though not perfect, at least prevents infection from several of the more nasty varieties and should be made available (if not free, then at least at subsidized cost) to all sexually active people, including adults.	Positive	No	No	No	No	No		No
	National	27	tapilot	35	11	1	2	awhLuh wrote: === ...as long as there is even 1 in a million bad reactions to the vaccine, I see no reason to give it to teenage girls, or boys. === Now, be honest. Have you ever purchased a lottery ticket? Your kids probably face a one in five thousand chance of getting clocked by a car every time they cross a street. Don't spew numbers like "1 in a million" until you truly understand them. 18:4…	Positive	No	No	No	No	No		No
	National	27	jrs113	12	7	1	1	What's good for the goose.....	Positive	No	No	No	No	No		No
	National	27	moestooge333	3	10	1	1	Sure, I can see the boys just lining up now.	Negative	No	No	No	No	No		No
	National	27	ajax88	12	21	1	1	After Bill Gates suggested in one of his population reduction symposiums that vaccines could play a major role in population control I am skeptical about the use of all government big pharma injections. I dont care if they are free for boys or girls as long as the health system does not force this on the population. My understanding is that the strain of human papaloma virus which can cause cervi…	Negative	No	No	No	No	No	1	Yes
	National	27	tapilot	12	1	2	2	6string wrote: === ...to all sexually active people... === To quote Bud Bundy from Married With Children: "Do you mean with a real person?". I just couldn't resist ;-D 19:40 PT	Positive	No	No	No	No	No		No
	National	27	Pumpkin eater	18	9	1	1	Just google HPV and have a look at some of the pictures. Anything that halts the spread of this disease is worthwhile.	Positive	No	No	No	No	No		No
	National	27	Queenofthenight	25	8	1	1	Of course it should be offered to boys and girls. Isn't that what equality of the sexes is all about? There are risks and possible side-effects to every medication on the market. One aspirin can cause minor bleeding in the lining of the stomach; but if you had a blinding headache, would you think twice about taking something to relieve the pain? It's called weighing the advantages and disadvantag…	Positive	No	No	No	No	No	2	No
	National	27	wanda white	11	12	1	1	goes to show sex is bad for the health it causes dieases, cancer and heart attacks,time to ban all sex for everyone.,people wants sex have them do it like they did on demolition man,no human contact no human fluids.other then that whats good for the goose is good for the gander.boys should get equal treatment,it should not always be about girls,when it comes to females they want their cake and ea…	Mixed	No	No	No	No	No		No
	National	27	R.Reagan	1	0	2	3	He doesn't know how to use the shells.	Positive	No	No	No	No	No		No
	National	27	Stay tuned	10	18	1	8	To those of you who oppose the HPV vaccine, I'd like to know if you've ever been vaccinated against other diseases - you know, the basic ones your parents thought enough of to ensure you were injected with them when you were babies - such as vaccines against typhoid, diptheria, whooping cough and tetanus. If you're old enough to have been vaccinated against smallpox, how did your parents respond …	Positive	No	No	No	No	No		No
	National	27	iamjema	9	2	1	1	Stay tuned, your whole argument falls apart when you mention tetanus as a desease. I was given smallpox & diptheria, and for the rest of those minor things I was sent to play with the other children who had them so I could get them and would have natural immunity. Todays doctors, under the unfluence of the pharmaceutical money machines and governments they have bought, will give anything they can…	Negative	No	No	No	No	No	1	No
	National	27	acrolein	22	15	1	6	I can not believe that our government would be that stupid to actually finance a pharmaceutical company on any vaccine let along one that has not even been tested to find out if it is no better than a placebo.Who do we sue if ten years from now and the adjuvants have damaged our child's mitochondria and he or she suffers cancer. My niece suffered from grand mall seizures after been given the Salk…	Negative	No	No	Yes	No	No	1	Yes
	National	27	GabbyG	23	16	1	14	clintonkr, You are justifiably wary, well informed (especially encouraging in someone your age), and strengthening your immune system (because therein lies the key to safeguarding oneself against these diseases) through your lifestyle. I am sure you will enjoy a long and healthy life. There is no proof this vaccine prevents cancer (but there is an ncreased number of precancerous lesions in vaccin…	Negative	No	No	Yes	No	No	1	No
	National	27	R.Reagan	8	2	3	3	Who needs chemotherapy when there is Yoga and toxin cleanses that work just as well!	Positive	No	No	No	No	No		No
	National	27	clintonkr	1	0	3	3	GabbyG, Thank you for your post - it's cases like yours that reaffirm my decisions and gives me hope that change is coming. While I was living in Europe the past two years, specifically the Netherlands, I enjoyed living in a society that is conducive to healthier living. Well-developed cycling infrastructure (which I love), wide selection of healthy, unprocessed foods and holistic shops were plen…	Negative	No	No	No	No	No		No
	National	27	Neil Gregory	13	4	1	1	acrolein wroote, "I can not believe that our government would be that stupid . . ." That is almost funny. Most of us have absolutely no trouble believing hos incredibly STUPID the Harper governments is on many issues.	Neutral	No	No	No	No	No		No
	National	27	passion8 CDN	24	14	1	2	Before anyone considers having this vaccine they should read all the postings of those healthy teenagers who died after receiving this vaccine. http://truthaboutgardasil.org/injuries/ We choose NOT to vaccinate our son or our daughters.	Negative	Yes	No	No	No	No		No
	National	27	HeadphoneLove	5	8	1	1	I do think it is alright to vaccinete the male half of the population. It only makes sesne and I have gotten it and nothing has happened to me or the poeple who got with me. I would urge you to give this to your kids and also take this as a chance to discuss safe sex with your kids.	Positive	No	No	No	No	No		No
	National	27	brucecification	7	1	1	5	On January 12, 2011 the Annals of Medicine published a ground-breaking peer-reviewed paper titled, Human papillomavirus (HPV) vaccine policy and evidence-based medicine: Are they at odds?, written by renowned researchers Lucija Tomljenovic, Ph.D.,and Christopher Shaw, Ph.D., with the Neural Dynamics research Group, University of British Columbia, in Vancouver. . The article points out to the medi…	Negative	Yes	No	No	No	No		No
	National	27	mjt@.com	8	5	1	1	these vaccines haven t been around for a long time, and can cause major damage. i think the gov t is using canadian children to test these vaccines.in the 60 's quebec doctors was testing and prescribing thalidomide to pregnant women,even though german tests had proven that there was damage to the fetuses.so parents beware,there is no way of knowing how this vaccine will affect the next generatio…	Negative	No	No	No	No	No		No
	National	27	BC person	2	2	1	1	Yes, there are benefits to receiving the vaccine. The repeated use of the word "free" though is extremely misleading. The cost of the vaccine is $150 a shot X 3 shots for every school age girl in Canada. Now they want to give $150 X 3 shots to every school age boy in Canada. I'm sure someone can do the math here and discover there is a lot of money behind this and it certainly isn't "free." In a …	Positive	No	No	No	No	No	3	No
	National	27	ManAgainstTime	1	7	1	1	Vaccines - like I believe all health care - should be paid for on a pay-per-use basis from the user.	Neutral	No	No	No	No	No		No
	National	27	simone36	3	2	1	5	In the news TODAY in Australia...Australias leading public health doctors are recomending that boys not be vaccinated for HPV. As in Australia cervical cancer rates are very low due to early screening. http://www.theherald.com.au/news/local/news/health/hpv-vaccine-for-boys-questioned/2521849.aspx I love CBC, but I really wish they would not mount tensions and have people in an uproar about this.	Negative	Yes	Yes	No	No	No	3	Yes
	National	27	simone36	2	0	2	5	http://www.theherald.com.au/news/local/news/health/hpv-vaccine-for-boys-questioned/2521849.aspx Just today in Australia news. Doctors there question need.	Negative	Yes	Yes	No	No	No		Yes
	National	27	simone36	2	0	3	5	http://www.theherald.com.au/news/local/news/health/hpv-vaccine-for-boys-questioned/2521849.aspx Just today in Australia news. Doctors there question need.	Negative	Yes	Yes	No	No	No		Yes
	National	27	acrolein	2	0	2	6	headphone love, Are you trying to punish your children by getting them vaccinated put it this way sex will be much more safe and enjoyable than the vaccine itself!	Negative	No	No	No	No	No		No
http://www.cbc.ca/news/canada/calgary/story/2012/11/28/calgary-catholic-school-board-hpv-vaccine.html	National	28	MASSEY JONES	15	27	1	4	That's the key to the whole thing. Parental consent. Not "helter-skelter" because the pricipal decided that all the kids in his/her school had to get the vaccine on the advice of some doctor or pharma salesman.	Negative	No	No	No	Yes	Yes		Yes
	National	28	fred9972	14	5	1	1	Yes, we mustn't have health policy based on medical science. That would be anti-biblical.	Positive	No	No	No	No	No		No
	National	28	M A T H I A S	1	3	1	4	I am surprised at the thumbs down here. Why are people disagreeing with requiring parental consent before administering an optional medical treatment. If this same discussion was to take place concerning a public school this comment would have a lot of thumbs up I suspect...	Positive	No	No	No	No	No		No
	National	28	mbjewel	53	7	1	1	Very good decision. Just because the school and church do not believe in pre-marital sex, does not mean it doesn't happen. I'm glad they gave their head a shake and left it up to the parents to decide.	Positive	No	No	No	No	No	2	No
	National	28	AlbertaGent	47	13	1	1	A another small victory of reason over superstition.	Positive	No	No	No	No	No		No
	National	28	SkySensei	25	9	1	1	Massey Jones: What sort of TV principals do you think are allowed to decide this for their schools? That's not how the world works. I'm glad they got this approved (five years after they should have). Parents still have the choice to opt their kids out and young adults can opt themselves in. The fact remains, the vaccine prevents a number of serious cancers in both sexes and the HP virus spreads …	Positive	No	No	No	No	No		Yes
	National	28	Backwards6	3	0	1	4	It does not spread via skin to skin contact.	Positive	No	No	No	No	No		Yes
	National	28	dindilion	5	5	1	1	One small step for progress. The fact that this topic is even up for discussion shows why the catholic school board shouldn't be allowed to exist! We need to change the laws and get rid of it! The vaccine protects our society! This is a good thing folks, LOL.	Positive	No	No	No	No	No		No
	National	28	M.J. Coldwell	13	9	1	2	This reminds me of the time an HIV-positive youth activist gave a talk at an assembly at my Catholic high school, where he--gasp--recommended condom use. Later, the school vice principal proceeded to go classroom-to-classroom to "advise" us that the AIDS virus was so small that it would just pass right through the molecular wall of a condom, and only abstinance could save us from the AIDS. End al…	Positive	No	No	No	No	No		No
	National	28	post 'er boy	11	0	1	2	I believe that you made a good decision. By offering the young people of your community every opportunity to have a happy and healthy life, you are exhibiting the use of good judgement, consideration, compassion, and care for others. All exemplary values ... Well done.	Positive	No	No	No	No	No		No
	National	28	Allan_Yeats	15	3	1	3	Saying the vaccine causes 'promiscuity' is like saying a fire extinguisher causes fires. Typical Theist thinking.	Positive	No	No	No	No	No		No
	National	28	UrAllSheep	7	10	1	2	People really need to research this vaccine before allowing your young girls to get it. I did! This vaccine is still too new and not tested enough and you are allowing your children to be guinee pigs,	Negative	No	No	No	No	No		No
	National	28	Backwards6	1	2	2	4	People need to realize that you can die from cancer. I almost did at the ripe old age of 27 I had to have a complete hystorectamy. My daughter will be getting this vaccine, just not at the age of 5.	Positive	No	No	Yes	No	No	3	Yes
	National	28	topchef	4	3	1	3	Thank you! I wish people would educate themselves! Backwards6: You likely had an HPV-negative tumor, they are much worse. Unfortunately your daughter is more likely to be harmed by the vaccine than cancer. Check out the Canadian Gardasil Awareness network website.	Negative	Yes	No	No	No	No		No
	National	28	DP_Alberta	2	0	1	2	Grade 5, not age 5.	Positive	No	No	No	No	No		No
	National	28	Backwards6	0	1	3	4	Its a personal choice for everyone thats the great thing about this country. For me, Id rather have my daughter vaccinated then go through the 4 years of complete hell that I did.... I carried her while I had cancer because I knew I wouldnt be able to have more kids. I love the two beautiful children that I do have, but everyday I have to live with knowing I can never have more, and I always want…	Positive	No	No	Yes	No	No	2	Yes
	National	28	CharlieVee	9	2	1	1	Good to hear. The ramblings from Bishop Henry on this matter grew old and tired, and regardless of what level of morality you have on the matter, protecting yourself against HPV does nothing to enhance promiscuity. And to be fair, Catholic schools and their administration in Alberta, are actually pretty progressive, as opposed to Ontario. The only reason this kept going on was people in the local…	Positive	No	No	No	No	No		No
	National	28	DanDan	6	10	1	1	Since when is taking your time and delaying a decision a bad thing? Sounds like they didn't take the knee-jerk route and took the time to deliberate. Flu shots, anyone?	Negative	No	No	No	No	No		No
	National	28	Stay tuned	2	2	2	8	The research evidence suggests that HPV may be responsible for most, if not all, cancers and benign tumours. Therapeutic vaccines are under development, which are expected to be capable of fighting exisitng tumours. Unfortunately, this work is not as well funded as it should be - with Canadian grants being minimal. Check the free online site known as PubMed - search under HPV and any cancer that …	Positive	No	No	No	No	No		No
	National	28	topchef	2	2	2	3	Where do you get your information? In realtiy, research shows HPV infection is not sufficient for cervical carcinogenesis. Most studies show HPV status is not a strong prognosticator of outcome in cervical cancer, in fact HPV-negative cervical cancer tumors are much worse and tumors with HPV DNA tend to be of an early stage and low grade. Check out the research at CDC.	Negative	No	No	No	No	No	1	No
	National	28	topchef	8	4	3	3	All parents should check out the Canadian Gardasil Awareness Network website to make an informed decision about this vaccine. After that argue for or against the vaccine, just please be informed. The lead researcher and developer of this vaccine, Dr. Diane Harper, is trying in vain to get the message out that this vaccine is not being administered as intended or researched. Please look into this …	Negative	Yes	No	No	No	No	1	No
	National	28	UrAllSheep	2	3	2	2	I think that alot of parents just think, oh what a vaccine that prevents cancer, lets get it, but not research it. The facts on this vaccine is very very scary!	Negative	No	No	No	No	No		No
	National	28	GreatCanadian13	7	1	1	1	Great to see the Catholic Church again leading the way on important social reform issues. At least it was less time to recognition this time than for poor Gallileo.	Positive	No	No	No	No	No		No
	National	28	burntoffering	1	0	1	3	I trust that your comment is tongue in cheek!! The catholic church has always been one of the most powerful institutional barriers to the advancement of science and the improvement of the human condition. And it still is.	Positive	No	No	No	No	No		No
	National	28	burntoffering	4	0	2	3	Hopefully this decision will go some way toward convincing the bishop that he needs to leave science to the scientists and stick to his recitation of old folk tales, i.e., religious dogma.	Positive	No	No	No	No	No		No
http://www.cbc.ca/news/canada/calgary/story/2012/11/07/calgary-hpv-catholic-schools.html	National	29	Andrew Of Richmond	85	25	1	1	Just be careful not to use words like "scientific" during the meeting or they'll come at you with the torches and pitchforks.	Positive	No	No	No	No	No		No
	National	29	post 'er boy	134	8	2	2	In other science news, it has been discovered that a startlingly high percentage of Catholics have parents that, at some point in their lives, had sexual contact. No comment yet on the validity of these findings. Why you would choose against protecting young women's health is totally beyond me.	Positive	No	No	No	No	No		No
	National	29	JOC826	87	13	1	1	It took the Catholic church over 300 years to pardon Galileo for saying the earth is round...modern science isn't really their "thing".	Positive	No	No	No	No	No		No
	National	29	burntoffering	66	10	3	3	Idea: Read what Dr. Savoia has to say and pay attention. What is more important to you, the health and life of your daughter or the opinion of a church which has treated women as second class people for centuries?	Positive	No	No	No	No	No		No
	National	29	theSchwartz2u	44	22	1		Parents acting as though they own their children, imposing their own religious views on their child's future health. This is child abuse, plain and simple.	Positive	No	No	No	No	No		No
	National	29	Just-me	17	4	1	1	Make the vaccine available to everyone then let them make the choice. It meet the requirment of a "yes" and "no" vote.	Positive	No	No	No	No	No		No
	National	29	Surreynewf	7	17	1		Wasnt the bigger issue why only girls required the vaccine and the associated risks (albiet very small) of side effects?	Neutral	No	No	No	No	No		No
	National	29	roundabout	11	6	1	1	Yes! The tea party is alive and well in Calgary.	Positive	No	No	No	No	No		No
	National	29	gowcher	12	5	1	1	Thanks Kathy, for being a leader in our community!!!	Positive	No	No	No	No	No		No
	National	29	TdoubleU	8	15	1	1	Why are people questioning vaccines laced with mercury, aluminum and formaldahyde? We all know the pharmaceutical industry has our best interest at heart. I don't know why people could be against such a profitable industry that often has no drugs that cure, but instead, poison you with side effects! Roll up your sleeves folks! These companies care about your health!	Negative	No	No	No	No	No	1	No
	National	29	Bow River	3	0	1	2	This comment is irresponsible. Vaccination is the greatest medical advance of the 20th century. How many people do you know who have died from diphtheria, polio, meningitis, or tetanus? "Side effects of the pharmaceutical industry"? How about blood pressure regulation, diabetes control, infectious disease prevention. Vaccine uptake is high in outpost communities, such as in rural Newfoundland. Pe…	Positive	No	No	No	No	No	2	No
	National	29	Die Bestie	3	1	1	2	Parents, ask yourself who has empirical proof behind the reasoning for and against the HPV vaccine. And then go and let Health Care administer the vaccine. Forget about the rest. It's a bark in the dark.	Positive	No	No	No	No	No		No
	National	29	Bow River	6	0	2	2	Boys and girls should be vaccinated but the Federal Government bought the vaccine only for girls because the initial indication was to help prevent cervical cancer.	Positive	No	No	No	No	No		No
	National	29	MASSEY JONES	7	5	2	4	I would post comments here but after researchiung some for an hour, they don't get published but the LOLs seem to.. Maybe it's the computer. I've had it checked by a reputable repair facility and the ISP and it's not. No bias here, I hope. My last one this morning was about the Glenbow, where I once worked. Let's blame the internet, because once CBC went twittering, it's been difficult to get fee…	Negative	Yes	No	No	Yes	Yes	1	Yes
http://www.cbc.ca/news/health/story/2012/10/15/hpv-shots-promiscuity-study.html	National	30	Ugh-What-The	7	83	1	1	this is pretty hilarious ... i bet you the boys mis agree ....	Positive	No	No	No	No	No		No
	National	30	Koastin	24	97	1	1	I've paid tax dollars for a headline like this?	Neutral	No	No	No	No	No		No
	National	30	VerbTheAdjectiveNoun	37	12	1	1	No one forced you to do anything but glance at it.	Neutral	No	No	No	No	No		No
	National	30	Virtual Sanity	25	2	1	1	It's okay, I'm happy to read this. It's important because promiscuity is a talking point for neocons that are against vaccination.	Positive	No	No	No	No	No		No
	National	30	pulo 008	2	27	1	1	Glance or read is still tax dollar wasted.	Neutral	No	No	No	No	No		No
	National	30	Arctic Dude	23	1	1	4	Unfortunately the study was probably needed because of the weak-minded wackadoodles out there that think that the vaccine causes promiscuity.	Positive	No	No	No	No	No		No
	National	30	DanceSmartly	24	1	1		Actually, the Americans paid tax dollars for this headline. We got to read it for free.	Neutral	No	No	No	No	No		No
	National	30	Etaoin Shrdlu	5	0	1	3	Actually, the Americans may not have paid tax dollars for this headline. The story says the study was funded by Kaiser Permanente and Emory University, which are both private.	Positive	No	No	No	No	No		No
	National	30	own goal	14	52	1	1	Has the HPV vaccine been tested on the XL Foods beef ?	Negative	No	No	No	No	No		No
	National	30	_Knighthawk_	85	16	1	1	One must be very careful when examining results of studies that are directly funded or indirectly funded by drug companies. A paid speaker in the past may want to be a paid speaker in the future. That said, I would be very surprised if this vaccination did increase promiscuity. The girls are 11 and 12 when they are vaccinated and are a little young to think that it gives them a license to be prom…	Mixed	No	No	No	No	No		No
	National	30	Dee1965	20	3	1	2	The girls getting this vaccine are too young to connect what this vaccine is for to sex. Even trying to make the connection, how would they connect a vaccine against cancer as a license to have sex??? The whole idea is absurd. Likely a rumour started by the church.	Positive	No	No	No	No	No		No
	National	30	JoolsBUK	129	9	1	1	This comment and related replies have been removed by the moderator.	Neutral	No	No	No	No	No		No
	National	30	ottawaltcmd	186	13	1	1	American far right persistently claims that any and all efforts to protect kids from sexually transmitted disease (HPV vaccine is one example) makes a young person more likely to be sexually active. The claim does not make inherent sense but that has little impact on the far right. Studies such as this, obvious as it may be for most people, are needed to counter the baseless claims.	Positive	No	No	No	No	No		No
	National	30	Mattman75	26	2	1	1	ottawaltcmd - Absolutely. But couldn't they have found more researchers without ties to the vaccine maker? Why give the conspiracy theorists any easy targets?	Positive	No	No	No	No	No		No
	National	30	NevilleQ	2	38	1	1	Yet I bet you didn't even look at the study. Even without looking at the study there are holes you could drive a truck through. The indicators of sexual activity are medically reported but highly inaccurate: Birth control advice; - teens check the internet/friends, they rarely ask the doctor. Tests for sexually transmitted diseases; - accurate Pregnancy Test; - most teens will buy over the counte…	Negative	No	No	No	Yes	Yes	1	No
	National	30	EInOttawa	37	1	1	1	The American far right does not listen to science. They don't listen to science on the subject of Climate Change. They don't listen to science on the subject of Evolution. So, they certainly aren't going to listen to science on the subject of sexuality.	Positive	No	No	No	No	No		No
	National	30	Trevber	2	0	1	1	NevilleQ Some teens do ask for birth control advice,it doesn't matter if most don't,they don't have to study every teen in the country. Same with pregnancy tests some talk to their Doctor. There is no reason to believe this study is inaccurate. And it is almost always the right that opposes any form of protection against STDs,mostly on the grounds that it is a license for teenagers to have sex. I…	Positive	No	No	No	No	No		No
	National	30	Die Bestie	150	7	2	2	Good. That's what every rational person expected. Now, the only thing left, is to air it on Fox News and shove it down the throats of all Rush Limbaugh -like and other conservative christian (Republican) relict moral preachers.	Positive	No	No	No	No	No		No
	National	30	Lailadama	133	6	1	1	Seriously they needed a study to figure this out? The premise behind the original question (usually by conservative religious groups) suggesting that girls will run off to try out their bodies after the vaccine is assinine. Its the same idiotic asertion that prevents some countries and states in the southern USA from allowing Sex Ed in their schools. They assume without a shred of evidence that t…	Positive	No	No	No	No	No		No
	National	30	ArthurPaliden	72	4	1	1	And then there is this study: Premarital Abstinence Pledges Ineffective, Study Finds "Teenagers who pledge to remain virgins until marriage are just as likely to have premarital sex as those who do not promise abstinence and are significantly less likely to use condoms and other forms of birth control when they do, according to a study released today. " http://www.washingtonpost.com/wp-dyn/conten…	Positive	Yes	No	No	No	No		No
	National	30	The Tragically Flip	19	1	1	6	Yeah, another totally "duh" obvious result. Those pledges are completely about peer and parental pressure, made worse by the adoption of those obscene "silver rings" that are worn so that the girl may give it to their spouse on their wedding night to prove they waited. Yeah, right. Obviously as a girl growing up in such circumstances you wear the ring to not get called a slut, not because you act…	Positive	No	No	No	No	No		No
	National	30	Border	105	4	1	1	Anyone who could believe that any vaccine would "cause promiscuity" will not be swayed by any scientific study - the most obtuce members of society don't digest facts or science too well.	Positive	No	No	No	No	No		No
	National	30	Sir_Will	50	1	1	4	Duh. But not overly useful study since those stupid enough to think it would are not the kind of people who believe such studies (or science in general).	Positive	No	No	No	No	No		No
	National	30	Rutlander	11	0	1	2	Any day now, we can expect to hear from the Vaccine Promiscuity Truthers.	Positive	No	No	No	No	No		No
	National	30	EBFilms	34	2	1	1	Every now and then i see headlines that make me go "duh!".	Positive	No	No	No	No	No		No
	National	30	Markmyword	10	22	1	1	why do we keep on getting silly american news?	Positive	No	No	No	No	No		No
	National	30	Etaoin Shrdlu	3	1	2	3	Most viruses don't even know what country they're in.	Positive	No	No	No	No	No		No
	National	30	MisterPG	29	4	1	1	Duh. Oh, authorities? BTW: needle exchanges don't create drug addicts, either.	Positive	No	No	No	No	No		No
	National	30	Arctic Dude	37	5	2	4	Shame we have to have a study like this to shut up the Taliban-like anti-science social-con fools that hate sex and think that abstinence is the only valid birth control allowable.	Positive	No	No	No	No	No		No
	National	30	Arctic Dude	9	3	3	4	Please note that this comment was directed at social-cons not fiscal or moderate conservatives. Big difference.	Positive	No	No	No	No	No		No
	National	30	Cheechum	1	14	1	3	Tell that to all the schoolgirls getting pregnant in their teens, not to mention getting diseased and renderfed infertile.	Negative	No	No	No	No	Yes		No
	National	30	Inflame-a-tory	58	5	1	1	No scientific study will prevent the Christian conservative wackos from trying to subjugate women to second class citizen status.	Positive	No	No	No	No	No		No
	National	30	Dave124	15	2	1		The study shows that the psychological impact of being safe from HPV does not cause more promiscuous behaviour. It has nothing to do with any physical factor (which is non existant) in the vaccine.	Positive	No	No	No	No	No	2	No
	National	30	brucecification	6	54	2	5	Ridiculous propaganda promoting profits for big pharma, don`t let this vax anywhere near your loved ones, do the research.	Negative	No	No	No	No	No		No
	National	30	TimBitzzz	23	3	1	13	If you believed that it did then you are stupid and if you are against the shot and you believe this is a good argument for not getting it again you are stupid. Here is a good argument against....side effects. Here is the compelling argument for the shot...the potential for cancer. All you need to know.	Negative	No	No	No	No	No	3	No
	National	30	Etaoin Shrdlu	34	2	3	3	I never beleived HPV shots would make girls promiscuous. Best to stick to the tried and true like alcohol.	Positive	No	No	No	No	No		No
	National	30	The Tragically Flip	46	4	2	6	I hope the wingnuts (who hate anything that sexually empowers women, or empowers them generally) and the anti-vaxxers (who are as bad as climate change deniers in trying to return us to medieval woo medicine) are happy now. I know they're not, and this kind of study won't persaude anyone who already isn't amenable to reason, and such people could already reasably infer that giving girls a vaccina…	Positive	No	No	No	No	No		No
	National	30	Duff Man	0	26	1	1	I see you defend your belief in man made global warming with a religious fervor. Go join a carbon church already, and fight the evil heretics who dare think for themselves! The issue with vaccines isn't the actual vaccines (the science behind introducing a live attenuated virus into the body to allow it to develop a defense against something actually IS settled.) It's stuff like putting toxic mer…	Negative	No	No	No	No	No		No
	National	30	Joe Calgarian	14	18	1	1	For these kids I think pregnancy is (or should be) a bigger worry than getting cancer when they're old. You know, like when they're 30.	Mixed	No	No	No	No	No		No
	National	30	M8888R	31	2	1	1	Well, duh...like everyone else is saying. However, what also irritates me is this obsession with female sexuality and the idea that women must be controlled. Get over it. I know that if there was a vaccine for boys no one would even question its usefulness or necessity.	Positive	No	No	No	No	No		No
	National	30	PEMCAT	14	0	1	2	This particular vaccine is used for boys too.	Positive	No	No	No	No	No		No
	National	30	Dee1965	22	1	2	2	Holy cow...who would even think that??? A vaccine against cervical cancer making girls promiscuous??? Seriously???	Positive	No	No	No	No	No		No
	National	30	Wooly_Socks	20	1	1	1	And in other news, water is wet.	Positive	No	No	No	No	No		No
	National	30	Cheechum	14	11	2	3	The shots won't make the girls promiscuous, it is the casual sex promoted in our media, our schools, and even our homes where fidelity in most marriages seems to be a thing of the past.	Negative	No	No	No	No	Yes	3	No
	National	30	Mark 138	27	1	1	1	Claiming that this vaccine will result in teenage girls becoming promiscuous is like claiming the fact that condoms, that are now available to teenagers, will result in the next high school dance to turning into an orgy.	Positive	No	No	No	No	No		No
	National	30	Basmama	5	29	1	1	What a ridiculous survey. I am surprised you considered it newsworthy. You've been bought, CBC. Girls of this age do not see receiving the HPV as an open door to sexual promiscuity. Perhaps a few paranoid parents do, but the girls don't. This survey smacks of Merck sitting behind Kaiser Permanante in order to try to get their less than ideal vaccine di$$emination back on track. Apparently a good …	Negative	No	No	Yes	No	No	1	Yes
	National	30	YaSure	15	4	1	1	But it says so in the Bible....	Positive	No	No	No	No	No		No
	National	30	whitegreyblack	21	4	1	1	These are the same debates that were being had when birth control pills were first made available in the 60's. It's disconcerting that our society's discourse constantly regresses to that of 50 years ago.	Positive	No	No	No	No	No		No
	National	30	Cheechum	2	19	3	3	Actually they were right about birth control pills, although it doesn't seem to have lessened teenage pregnancies in our schools.	Negative	No	No	No	No	Yes		No
	National	30	LGClark	23	2	1	1	This comment and related replies have been removed by the moderator.	Neutral	No	No	No	No	No		No
	National	30	1000ltd	2	23	1	2	Multiple-sclerosis-like symptoms and neurological complications, including seizures, paralysis and speech problems, are being reported by increasing numbers of girls and women following Gardasil vaccination I cant believe that in a country full of supereducated people still believes every word that flies out of the mouths of doctors and pharma	Negative	No	No	No	No	No	1	No
	National	30	Backwards6	10	0	4	4	The same can be reported from any type of vaccine. The point is that maybe 1% of people are feeling these affects while 99% of people will never have to go through invasive surgeries.	Positive	No	No	No	No	No	2	Yes
	National	30	thinking86	22	1	1	1	How is protecting yourself from 1 out of hundreds of sexually transmitted diseases going to make you promiscuous???	Positive	No	No	No	No	No		No
	National	30	1000ltd	0	21	2	2	Lets expand this vaccine joke a little further.... If they can produce one that stops cervical cancer why oh why dont they have one for all other cancers????? Wierd isnt it	Negative	No	No	No	No	No		No
	National	30	blogpocalypse	12	0	1	1	No, it isn't "wierd" howard. It is weird, however, that you didn't mention that cervical cancer is different from other cancers in that one of its leading causes is a VIRUS. It is the virus you are being vaccinated against, and the bonus is that the often accompanying byproduct of cervical cancer can be avoided...	Positive	No	No	No	No	No		No
	National	30	mia1965	11	0	1	3	It doesn't prevent cancer, it prevents the HPV virus [sexually transmittable warts] which can eventually cause cervical cancer. They may still get cervical cancer but it reduces the risk from this specific cause. And you don't need to be promiscuous to get HPV virus either, any more than you need to be promiscuous to get pregnant: the Christian right always assumes that these are from a cumulativ…	Positive	No	No	No	No	No	2	No
	National	30	KawarthaJon	19	0	1	1	I definitely do not want my daughter to suffer needlessly by having cervical cancer if she can be vaccinated against HPV! I would be devastated if she died of cancer!When she is old enough to get it, I will be taking her to get the vaccine.	Positive	No	No	No	No	No		Yes
	National	30	DP_Alberta	18	3	2	2	For everyone saying 'well duh' and why did this study have to be done?, etc. you just have to look at Calgary Bishop Fred Henry. Based on his proclamation that the HPV vaccine would turn girls into hookers, the Catholic School Board is not allowing it into their schools. He'd rather girls died than 'sinned', even if the connection is only in his mind.	Positive	No	No	No	No	No		No
	National	30	Networks	10	2	1	2	I get what your saying... but my point would be... so what if a girl wants to be a hooker that's up to her.. what a girl does with her body is her business. It's time the church or any man stops trying to control women and their choices. They turn something that could save lives for women into a shameful thing, the church is pathetic. They have been trying for century to control sexual behavior, …	Positive	No	No	No	No	No		No
	National	30	canuck750	15	5	1	1	This will not stop the irrational paranoia of the far right evangalists.	Positive	No	No	No	No	No		No
	National	30	maybe-not	3	7	1	2	Big Pharma and serve and protect governments doing what they are supposed to! As for consequences, we'll talk about it another day! As for now, full staem ahead with HPV vaccines! My way or highway is the name of the game in Global Village!	Negative	No	No	No	No	No		No
	National	30	mia1965	18	1	2	3	I guess if girls are vaccinated against typhoid, they go out and drink run-off from sewage?	Positive	No	No	No	No	No		No
	National	30	mia1965	13	3	3	3	You don't need to be promiscuous to get HPV virus, any more than you need to be promiscuous to get pregnant but the moralists and Christian right seem to assume that these are from some long-term and widespread cumulative effect, which boogles the mind if you actually use your mind which they apparently do not. Oh well, these are the same judgemental mental midgets who thought rape victims could …	Positive	No	No	No	No	No		No
	National	30	Networks	7	3	2	2	why would they think that girls become promiscuous is the HPV vaccination an Aphrodesiac? this study is so ridiculous.	Positive	No	No	No	No	No		No
	National	30	BradNB	4	14	1	4	It's amazing the kids of things that get by the mods here vs what doesn't. There is an astounding amount of bigotry in the forum today (and every day) but it's politically correct bigotry, against a group that it's ok to discriminate aganist, so they let that slide. Meanwhile, I tried to correct one of them by replying to their comment. No "personal attack." Nothing out of line, but they didn't p…	Negative	No	No	No	Yes	Yes		Yes
	National	30	MSmitty	0	2	1	2	For some reason, I am not surprised to see that this comment, very correct and well reasoned, is thumbed down but lacking in replies. Seems the PC bigots can disagree but lack the intelligence to formulate a logical rebuttal. The anti-Christian babble which passes for commentary on some of these boards would be moderated out if you took the word "Christian" and replaced it with any sex, ethnicity…	Positive	No	No	No	Yes	Yes		Yes
	National	30	imadiveguy	2	0	1	1	that's funny, I went through the forums after reading this post and counted 3 posts that even mentioned Christianity. Personally I don't consider that to be 'an astounding amount of bigotry in the forum today'.	Neutral	No	No	No	No	No		No
	National	30	MSmitty	2	0	2	2	Let's be honest... Slippery slope arguments have been applied to such preventative measures for a long time. They are patently illogical in most cases. I hardly think a person needs to bash all people of faith because some people believe something really stupid. No, this vaccine will not send girls running out to have sex. An unstable family is much more likely to have this effect. My wife brough…	Positive	No	No	No	Yes	Yes	2	Yes
	National	30	Randy75	3	0	1	2	What a complete shock. Not nearly as believable as a talking snake.	Positive	No	No	No	No	No		No
http://www.cbc.ca/news/health/story/2012/04/13/hpv-vaccine-boys.html	National	31	Filthy MacNasty	122	98	1	1	until there is greater studies of long term effects of HPV Vaccinations on girls and boys, i say give it to nobody. there are other ways to combat these same issues without killing, sterilizing or otherwise maiming young people who's reproductive systems are not fully developed. thalidomide should have been the wake-up call, not the exception to the rule.	Negative	No	No	No	No	No	1	No
	National	31	AB Anthropologist	23	6	1	1	Thalidomide was a drug, not a vaccine.	Positive	No	No	No	No	No		No
	National	31	Sanity_check	16	15	1	4	AB- ask a person with deformities from Thalidomide whether they care that it was a vaccine or a drug.	Negative	No	No	No	No	No		No
	National	31	WilliamD	4	1	1	2	Thalidomide was only a problem for women with a vitamin B deficiency in there first trimester. It was also the only tranquilizer that could be given to suicidal patients.	Positive	No	No	No	No	No		No
	National	31	saskatchewinner	6	5	1	1	tell that to all the small pox victims... and polio victims....	Positive	No	No	No	No	No		No
	National	31	kildare99	86	160	1	6	They sure won't be sticking my kids with this concoction. Cancer is very easily prevented and cured to those who do a little research outside the modern medical community. It's not even on the radar for informed people.	Negative	No	No	No	No	No		Yes
	National	31	itsrickster	80	18			Kildare. What a foolish statement I am a cancer patient and have been battling this disease for some time if there was a cure I would know about it by now and so would all of the other dying patients. Shame on you for your ignorance!	Positive	No	No	Yes	No	No		No
	National	31	Sir_Will	49	3	2	4	...no, just no.	Positive	No	No	No	No	No		No
	National	31	kildare99	12	69	2	6	Well, if you are "battling" cancer then you are not informed....don't be a whiny victim...just get serious about it. People are getting rid of cancer all the time, first step is to stop listening to your doctor and anyone else in the medical/pharamceutical industry.	Negative	No	No	No	No	No		Yes
	National	31	The Tragically Flip	31	5	3	6	Well, I await yet more stories about people with treatable cancers dying because they refused medical treatment in favour of herbal concoctions and raw food.	Positive	No	No	No	No	No		No
	National	31	jross00	23	6	1	2	pure ignorance	Positive	No	No	No	No	No		No
	National	31	jross00	37	5	2	2	Cancer is very easily prevented and cured...shameful, irresponsible not to say so delusional and uninformed	Positive	No	No	No	No	No		No
	National	31	Starlett	28	5	1	1	Cancer is very easily prevented and cured to those who do a little research outside the modern medical community. It's not even on the radar for informed people. Give me a freaking break. Tell that to the relatives that I have lost to Cancer. Tell that to my boyfriend's dad who is battling Cancer. Tell that to friends and family who have battled and either are in remission or going through treatm…	Positive	No	No	Yes	No	No		No
	National	31	kibber	6	37	1	3	this post is 100% accurate	Negative	No	No	No	No	No		No
	National	31	petrarch	28	6	1	7	Wow, my dad just died of cancer....they caught it as early as possible...guess he just wasn't informed enough, or tough enough to survive. Totally his fault. Regardless....even if your kid doesn't get cancer.....the vaccine prevents genital warts. I could not imagine having to deal with that...walking into the doctor's office and trying to have them burned off? Embarrassing and painful....I would…	Positive	No	No	Yes	No	No	2	No
	National	31	Studentofthegame	29	5	1	1	first step is to stop listening to your doctor and anyone else in the medical/pharamceutical industry Yes, that worked well for Steve Jobs, didn't it? You know, kildare99, even if there WAS a shred of truth to your claim about being "informed" (in which case, please DO SHARE your sources), you should be ashamed for throwing it in the face of cancer patients with such callousness. You are insultin…	Positive	No	No	No	No	No		No
	National	31	PharmStudHali	11	5	1	4	This is so far off the mark it I have to believe you are joking...? Woww.	Positive	No	No	No	No	No		No
	National	31	shponglefan	12	5	1	1	kildare99, your post is full of so much FAIL it hurts.	Positive	No	No	No	No	No		No
	National	31	Arrdvark	11	5	1	1	kildare Your statement is testamony to your ignorance and your inability to understand the simple principle of cause and effect. I don't know you from adam. I do know that there are people who simply cannot grasp math and science. It must be difficult to choose what to believe, who to believe and when to believe when there is no basis to make a choice with. Science is not a choice of who or what …	Positive	No	No	No	No	No		No
	National	31	Tyrannorabbit	12	4	1	2	kildare99, don't give us this "do a little research". Stand behind what you say. Tell us how we can cure ourselves of cancer. Don't you feel any responsibility to the people who you could cure? Come on, you could change the world here.	Positive	No	No	No	No	No		No
	National	31	EL_Padroni	120	117	1	1	What a sham....kinda of like H1N1 with Glaxo Smith & Klein making a killing. Now it's Merck's turn to rake in the dough. Give your head a shake before immunizing your kids	Negative	No	No	No	No	No		No
	National	31	Goders	12	7	1	1	I recommend you do some research into the events that followed in Russia when they decided to stop immunizing against C. diptheriae. long story short- Once they stop immunizing children Russia there was an outbreak that killed thousands, notably the children who weren't immunized. Moral of the story: Immunizations are important if we want to care for our health and the health of children.	Positive	No	No	No	No	No	2	No
	National	31	mrclam	14	9	1	4	Yeah - dont immunize your kids! It's not like immunization has ever stopped anything like polio or anything has it?	Positive	No	No	No	No	No		No
	National	31	Rick B2	135	45	1	1	Vaccinating boys is a logical step as boys can spread the HPV virus too. BUT, because the vaccines are so new, there is little to no data on how long the immunity will last after vaccination. Some suggestions I have read say maybe 10-15 years, meaning re-vaccination will be necessary to maintain protection. The boys' vaccination programme is also being pushed by big pharma, for obvious reasons.	Mixed	No	No	No	No	No		No
	National	31	T2Steve	36	27	1	1	the fact that the immunization may only last 10-15 years doesn't mean that it shouldn't be administered. By my count, most people are done with the "casual sex" experience by the time they are 25-30, and if there can be a sustained "gap" of 10-15 years, most forms of this cancer (that is caused by infection) will vanish. I'm not sure at what point "may prevent 50% of penile cancers" became jargon…	Positive	No	No	No	No	No		No
	National	31	AlexMurdoch	34	19	1	3	Yes, because obviously Big Pharma has a vested interest in us not getting cancer later in life and not spreading sexually transmitted diseases. How deep does your rabbit hole go?	Positive	No	No	No	No	No		No
	National	31	TinnyJohnson	21	13	1	1	I agree with you 100%. The medical and scientific community outside the big pharma will tell you the truth about HPV vaccination, which is it may not be 100% guaranteed, that it only covers a few of the most popular strains of HPV and the cancer rate numbers shown in this article are very much exaggerated. This clearly is a lobbying effort by the one company that produces gardasil to sucker the g…	Negative	No	No	No	No	No	1	No
	National	31	Red_turns_grey	12	13	1	1	I am way ahead of the game on this one. After our girls received the vaccine in school, and it wasn't offered to my son, I went through our family doctor. He had no problem giving the vaccine to our son and my husband's work plan even paid for it. If it saves his life, that is all that matters to me.	Positive	No	No	No	No	No	2	Yes
	National	31	GeckoX	10	6	1	1	There are no long term studies on these vaccines, and there are already studies showing that there are some dangerous side effects in small populations. No thanks.	Negative	No	No	No	No	No		No
	National	31	Lazemaple	130	121	1	4	A balanced article would mention the HIGH rate of adverse reactions, auto-immune diseases and even DEATHS caused by this vaccine. It might also mention using Condoms or ABSTAINING from casual sex to prevent contracting the papilloma virus. The only win/win situation is for big Pharma! http://truthaboutgardasil.org/ http://articles.mercola.com/sites/articles/archive/2012/01/24/hpv-vaccine-victim-s…	Negative	Yes	No	No	No	Yes	1	No
	National	31	CheerBear	35	24	1	1	Well, I'm convinced! If it's on the internet then it MUST be true!	Positive	No	No	No	No	No		No
	National	31	Grace King	11	26	1	1	Of course! the' big farma ' could not make more money of 'flu' vaccines and was sued for wrong doing so now finding this? In my opinion children should not be subjected to sex education in schools, in TV....etc....and other mass media children have to LEARN and not thing about sex! Do parents have ANY control? NOPE!	Negative	No	No	No	No	No		No
	National	31	AlexMurdoch	31	15	2	3	And, of course, the rational reply to a fear-mongering post like yours would be to point out the decrease in morbidity and mortality due to the development of vaccines. Of course, this doesn't jive with your conspiracy theories of every doctor being in the pocket of Big Pharma.	Positive	No	No	No	No	No	2	No
	National	31	GabbyG	19	12	2	14	To CheerBear: Rather than read the information about the statistics, dangers, and case histories (which merely happen to be available online) and educate yourself, you would prefer placing your faith in Merck, who used faulty statistics to sell this vaccine, who lavished a ton of money on doctors, professional societies, and over 100 legislators, and who make millions in profits from it?	Negative	No	No	No	No	No		No
	National	31	Lazemaple	18	7	2	4	Cheer Bear, try the Center for Disease Control link http://www.cdc.gov/vaccinesafety/Vaccines/HPV/gardasil.html Perhaps that institution holds some credibility for you. There are reports of 71 deaths, Guillain-Barré syndrome (GBS) has been reported after vaccination with Gardasil® . GBS is a rare neurologic disorder that causes muscle weakness and Blood Clots	Negative	Yes	No	No	No	Yes	1	No
	National	31	petrarch	12	13	2	7	Please provide evidence that this vaccine has killed anyone. Remember that VAERS is simply self-reported, it doesn't mean verified. Remember one guy reported that the H1N1 vaccine turned him into the Incredible Hulk!	Positive	No	No	No	No	No		No
	National	31	B.Spears	12	3	1	1	ABSTAINING? Is this the southern US or the 1930s? Nope.	Positive	No	No	No	No	No		No
	National	31	SCMacNeil	94	88	1	1	This is a no-brainer. Vaccinate everyone who might be at risk, and save in health care costs down the road. Apart from financial considerations, if it might prevent human suffering it's just the right thing to do.	Positive	No	No	No	No	No	2	No
	National	31	Lazemaple	30	18	3	4	Depends how you define 'suffering' - abstaining from sexual relations or using condoms is not 'suffering' these side effects ARE Reports of Health Concerns Following HPV Vaccinationhttp://www.cdc.gov/vaccinesafety/Vaccines/HPV/gardasil.html "As of September 15, 2011, there have been a total 71 VAERS reports of death among those who have received Gardasil®." "There have been some reports of blood …	Negative	Yes	No	No	No	Yes	1	No
	National	31	RTContracting	13	8	1	11	Lazemaple: You forgot to include this quote from the site you linked to: "there was no unusual pattern or clustering to the deaths that would suggest that they were caused by the vaccine and some reports indicated a cause of death unrelated to vaccination."	Positive	Yes	No	No	No	No		No
	National	31	Rutlander	90	75	2	2	In before the mad tinfoil hatters. I'm sure this will be linked to a Big Pharma conspiracy to make everyone autistic.	Positive	No	No	No	No	No		No
	National	31	Sanity_check	14	7	2	4	Yes - how dare anyone ask questions.	Negative	No	No	No	No	No		No
	National	31	tedhead	99	62	1	1	35 radiation and 3 chemo and a host of complications and a year out of our lives!!!!!!!! HPV caused my throat cancer. I wish this vaccine was available when I was young......A big thank you to all the Doctors Researchers Therapists Nurses and others that got me through it......Parents please do not hesitate!!!!!!	Positive	No	No	Yes	No	No	2	No
	National	31	DBT1979	48	99	1	5	This is an good option for parents of males who feel type of protection is warranted. HPV is a serious thing. We have a relative who due to a previous HPV infection is now much more at risk at developing cervical cancer. I circumsized our son last year partly to try reduce his chances of ever contracting and spreading HPV. It's nice to have other options for parents who don't want to circumsize y…	Positive	No	No	Yes	No	No		Yes
	National	31	kibber	15	9	2	3	too much Kool-Aid	Negative	No	No	No	No	No		No
	National	31	DBT1979	8	10	2	5	Listening to the World Health Orgnaization is "Drinking the Kool-Aid?"?	Positive	No	No	No	No	No		Yes
	National	31	mrclam	18	4	2	4	Whereas i agree with your sentiment - I dont see how mutilating your childs penis will protect him?	Positive	No	No	No	No	No		No
	National	31	St.Agnostic	10	4	1	4	While I believe that proper vaccines administered for the greater good have eradicated nasty illnesses from mankind... Not those whose objective is pure greed. Circumcision is pure mutilation. Only primitive societies still carry out this anachronism out of twisted ignorance. If it is okay to circumcise humans of the male gender, is it also okay to perform the same barbaric atrocity upon humans o…	Negative	No	No	No	No	No		No
	National	31	DBT1979	4	6	3	5	I would never say it's mandatory to circumcise your child. I would never force to believe in the scientific reports that cite lower HPV / STD rates by reputable organizations like the WHO. Everybody loves their children and we all do what we think is best for them at the time with the information that we have. And that's all anybody should ever say on that issue.	Positive	No	No	No	No	No		Yes
	National	31	canadakim1	95	25	1	1	Does Dick Cheney own this vaccine like he did the swine flu vaccine?	Negative	No	No	No	No	No		No
	National	31	newsferatu	119	42	1	1	$500 per person? Forget it. The government doesn't have the money and Canada needs more jets, more oil, & greater corporate tax breaks to draw in foreign investors. Cut. Cut. Cut.	Negative	No	No	No	No	No		No
	National	31	Simple_truth	8	17	1	3	(1) Give loin cloth to our soldiers (who are ready to sacrifice their lives) (2) Bike to work. (3)Tax corporate world to death, so that they can no set up manufacturing units. Do these satisfy you?	Negative	No	No	No	No	No		No
	National	31	exasperation	8	2	1	1	If you want to reduce it down to math, does the cost of treating all the cancer cases, plus their long term cost in terms of lost productivity, outweigh the cost of the vaccine? Nothing else is relevant in terms of the question of financial cost. There's certain ethical objections to be made about the human cost -- after all, the most --financially prudent-- decision for health care would be to e…	Positive	No	No	No	No	No	2	No
	National	31	Woodrov	3	1	1	1	@exasperation What? Make a judgment based on a cost-benefit approach? That would require both a committment to scientifically-based peer reviewed research and a proper accounting of health costs. I'm sure we have no time for your elitist ramblings... i	Mixed	No	No	No	No	No	4	No
	National	31	radio-too	127	84	1	1	Thank goodness there weren't so many anti-immunization cranks a few generations ago, or we'd still be having smallpox outbreaks.	Positive	No	No	No	No	No		No
	National	31	The Tragically Flip	35	23	4	6	These cranks are hampering the fight to eradicate polio. They spread paranoia and mistrust and we're so close to eliminating another disease from human circulation. It's really maddening.	Positive	No	No	No	No	No		No
	National	31	ljhnsn61	36	48	1	2	Interesting to see you put genital warts in the same category as "smallpox". Could you be embellishing your point just a tad?	Negative	No	No	No	No	No		No
	National	31	AoD669	21	12	1	4	@ljhnsn61: It might not be as deadly in most cases, but these two strains are pretty dangerous. And I fail to see how anyone with the choice between preventing that or getting HPV would willingly accept the second option.	Positive	No	No	No	No	No		No
	National	31	passion8 CDN	62	49	2	2	The current push for vaccination is not for increasing health of Canadians, but increasing wealth of pharmaceutical companies (who are scrambling as their major money making drugs come off patent protection and generics become available). Neither boys nor girls should be given HPV without first viewing the following site; http://sanevax.org/hpv-vaccine-vaers-reports-march-2012/ Be informed.	Negative	Yes	No	No	No	No	1	No
	National	31	JimmyWIlliams	43	45	1	1	Sounds a lot cheaper to not have sex, or at least be careful about who you have sex with.	Negative	No	No	No	No	Yes	1	No
	National	31	AoD669	17	3	2	4	Yeah, then you end up with someone who swears to God he/she is clean, and isn't, and you catch something like that.. because they don't run HPV tests on the routine std testing (they don't run HSV tests either). So you never know, and it's safer to have a vaccine than ending up with cancer because someone lied to you or didn't know their infection status.	Positive	No	No	No	No	No		No
	National	31	workaholic	59	21	1	2	It is frustrating to see many of the comments made in response to this article. Here are a few important facts (to clear up a lot of the inaccurate statements that people are making): 1. Condom use does offer complete protection against HPV (it does reduce the transmission) 2. HPV is extremely common 3. Most women/men who have HPV infections will clear them without progressing to cancer 4. Some s…	Positive	No	No	No	No	No	2	No
	National	31	RTContracting	12	5	2	11	Did you mean: Condom use does NOT offer compete protection against HPV. ?? Condoms are never 100% effective.	Positive	No	No	No	No	No		No
	National	31	workaholic	18	1	2	2	Sorry, my point #1 should read that condom use DOES NOT offer complete protection from HPV infection. Horrible mistake!	Positive	No	No	No	No	No		No
	National	31	FreddyRose	12	10	1	2	6. The cancers I listed in the prior point can be prevented with this vaccination That remains to be seen. We will not know for sure for 10-15 years.	Negative	No	No	No	No	No		No
	National	31	mrclam	9	7	3	4	>That remains to be seen. We will not know for sure for 10-15 years. We wont know at all if no-one takes it.	Positive	No	No	No	No	No		No
	National	31	v_mulligan	4	3	1	5	All true. The other important fact I'd add to this is: 7. An infected individual who never develops symptoms or cancer can pass the virus on to other individuals, some of whom may develop cancer.	Positive	No	No	No	No	No	2	No
	National	31	Stay tuned	33	36	3	8	For the naysayers here, I want you to know that I have been following the peer reviewed, medical research literature associated with HPV and cancer since 1996. Let me assure you, that the estimates put forth in in this article with respect to the impact of HPV in the development of cancer are conservative!! Young adults should invest in one of the HPV vaccines - you may not yet have been exposed …	Positive	No	No	No	No	No	2	No
	National	31	LizZardLips66l	13	8	1	3	@StayTuned~ With over 100 deaths,close to 1000 disabled and not to mention over 10,000 reported hospital visits caused by the HPV vaccines would you take a chance with your children ???	Negative	No	No	No	No	No	1	No
	National	31	Opinion234	73	25	1	19	Should Boys Be Given the HPV Vaccine? The Science Is Weaker than the Marketing http://blogs.discovermagazine.com/crux/2011/11/14/should-boys-be-given-the-hpv-vaccine-the-science-is-weaker-than-the-marketing/	Negative	Yes	No	No	No	No	1	No
	National	31	mrclam	13	8	4	4	Hmmm, do i believe scientists or a journalist?	Positive	No	No	No	No	No		No
	National	31	acrolein	41	35	3	6	As far as vaccines it is coming more apparent that with the decline of the smoking population pharmacy needs to find a new way to cause chronic diseases, enter the era of toxic adjuvants? Tell me why would not our government ban at least the sale of mentholated cigarettes now that it is known to be twice as toxic compared to regular cigarettes in regards to brain injuries.In the first place menth…	Negative	No	No	No	No	No		No
	National	31	AoD669	5	7	3	4	So, you're against menthol.. what next, peppermint? There's a lot of menthol in it naturally, you know. And people have been consuming peppermint (and incidentally menthol) way before the first pharmaceutical companies were created.	Positive	No	No	No	No	No		No
	National	31	AlexMurdoch	67	58	3	3	It would appear that the Big Pharma conspiracy theorists have now taken hold of this thread. That's too bad. If you honestly have questions about the HPV vaccine, talk to your physician. Not a chiropractor, homeopath or naturopath.	Positive	No	No	No	No	No		No
	National	31	LizZardLips66l	13	8	2	3	@AlexMurdoch~Try going to sanevax.org and look at the "Gone after Gardasil" post and tell me what you think...	Negative	Yes	No	No	No	No		No
	National	31	AoD669	15	3	4	4	A pharmacist would give good information too, in most cases.	Positive	No	No	No	No	No		No
	National	31	mcshane	92	35	1	6	Gardasil Researcher Speaks Out Dr. Diane Harper says young girls and their parents should receive more complete warnings before receiving the vaccine to prevent cervical cancer. Dr. Harper helped design and carry out the Phase II and Phase III safety and effectiveness studies to get Gardasil approved, and authored many of the published, scholarly papers about it. She has been a paid speaker and c…	Negative	Yes	No	Yes	No	No	1	No
	National	31	GabbyG	16	8	3	14	You're using figures/info fromMerck's site and research?! Good grief. Examples: - Gardasil's website omits mention of death as a possible side effect of the HPV virus. - Also conveniently omitted is the fact that vaccinated women show an increased number of precancerous lesions caused by strains of HPV other than HPV-16 and HPV-18. - As for other serious adverse experiences, Merck says: "None was…	Negative	Yes	No	No	No	No	1	No
	National	31	Stay tuned	21	26	4	8	Filty MacNasty - apparently, you are unaware that HPV infection is particularly harmful to youngsters. Huge numbers of people the world over are dying every year of cancers that can be prevented. Individuals have every right to choose for themselves to be vaccinated or accept treatment for physical conditions, but if you are not a health professional with expertise in vaccines, cancer or related …	Positive	No	No	No	No	No		No
	National	31	kibber	52	67	3	3	anti-immunization cranks? HA! tell me, before vaccines did 5 year old children develop 'rare' forms of cancer in record numbers? there is a correlation between disease and vaccines I don't know the whole extent but the evidence simply cannot be ignored The collusion between big pharma and big government is too obvious to also ignore sorry if this upsets your Sunday...	Negative	No	No	No	No	No		No
	National	31	petrarch	19	9	3	7	Citations please. What are these record numbers...and yes, before vaccines children still got rare cancers. Now tell me, what were the rates of these rare cancers in both vaccinated and un-vaccinated populations, by country before and after the introduction of vaccines? Clearly you have this information, otherwise you would just be making stuff up right?	Positive	No	No	No	No	No		No
	National	31	Jof585	60	31	1	4	Does any of you remember when the flu vaccine was first available ? It was only for seniors. Then it was for health care workers, then pregnant women, then children under 2 or 3 . Then basically everyone. Totally ridiculous. Money grab for pharmaceuticul companies. Plain and simple. Money, money, money ......	Negative	No	No	No	No	No		No
	National	31	twobergs	42	17	1	1	I'm not anti-immunization, but I did a lot of research when the permission form came home from my daughter's school. Cervical cancer kills a little over 300 women a year in Canada. Virtually all of these cases would not have been fatal, if the women had gone for their annual pap test. On the money side, if the vaccine would make the pap unnecessary it would be a good public health investment. But…	Negative	No	No	No	No	No	1	Yes
	National	31	LightsAhead	27	22	1	2	Doctors do not give this vaccination to there children or about 2/3 of the other vaccinations to there children so why should the rest of people.	Negative	No	No	No	No	No		No
	National	31	TimothyRiches	0	0	1	1	That data came straight from where the vaccination is intended to protect.	Positive	No	No	No	No	No		No
	National	31	Hanako2	36	21	1	1	What a great idea! Use our children as guinea pigs, while at the same time making a bundle doing it. If they need experimental bodies, They should be paying for it rather than demanding a ransome for the opportunity of ruining the lives of countless families.	Negative	No	No	No	No	No		No
	National	31	The Tragically Flip	21	20	5	6	JimmyWilliams says: "Sounds a lot cheaper to not have sex, or at least be careful about who you have sex with." This kind of sentiment comes up every time, as if we can solve this if parents are just a little stricter about their daughters' upbringings or something. Cheaper? How exactly do you propose we bring about that end? Restore Victorian ethics? Chaparones for all interactions between unmar…	Positive	Yes	No	No	No	No		No
	National	31	garnet1245	9	10	1	13	@Tragically Flip. "The vaccine is cheaper than treating cancer." Yeah, if it works, and if the vaccine itself isn't a cause of cancer. And, oh yeah, if big pharma isn't lying or distorting, or withholding informations on its side effects. If you believe	Negative	No	No	No	No	No	4	No
	National	31	GabbyG	43	22	4	14	Free HPV vaccine? I don't think so. The cost to vaccinate 11- and 12-year old boys in the U.S. would be an additional $38 million – straight into Merck's pockets. Long-term effects: unknown Short-term effects (recorded, to date): Bell's Palsy and Guillan-Barre syndrome, seizures, cervical dysplasia, and cervical cancer, blood clotting and heart problems, including cardiac arrest, miscarriages and…	Negative	Yes	No	Yes	No	No	1	No
	National	31	Mamanofthree	3	0	1	6	Thank you for the information and for your story. Very inspiring to see that there are some people out there who are taking responsibility for their own health, rather than depending on the pharmaceutical companies to come up with the next wonderdrug to mask the symptoms of whatever is ailing them.	Negative	No	No	No	No	No		Yes
	National	31	Simple_truth	23	14	2	3	As long as drug companies get more money through "treatment" (i.e repeated/lifelong drug intake), they will not be interested in cure(drug intake for limited period).	Negative	No	No	No	No	No		No
	National	31	zookeeperv	8	2	1	15	So, wouldn't a vaccine run counter to your argument? By preventing the disease in the first place, they can't make any more money off of it.	Positive	No	No	No	No	No		No
	National	31	selenius	28	33	1	6	if a vaccination exists...get it. whatever you can avoid, avoid. there is so much out there you cannot get vaccinated for, take a few things off the list. Get the Hep B vaccination too.	Positive	No	No	No	No	No		No
	National	31	garnet1245	9	10	2	13	Yes massuh, I'll run right out and get that life-saving vaccination 'cause you said so. Any vaccinations that you missed?	Negative	No	No	No	No	No		No
	National	31	Thanks4Playing	4	2	1	20	@ selenius - Do you have to wear a larger Hat when the temperature goes up ?	Negative	No	No	No	No	No		No
	National	31	Dr. Paxton	16	9	1	1	Always be sure your stock adviser is up on the providers of these medicines, and has you properly leveraged, prior to any mass implementation of vaccines. This has been a medical minute....I'm Dr. Paxton.	Negative	No	Yes	No	No	No		No
	National	31	JessDD	27	18	1	3	To those who cite side effects resulting in death or severe disability, I want you to think of this: The percentage of people who die or are disabled and/or become chronically ill because of HPV that the vaccine immunizes againt: 25% (in Canada, this is roughly 10,000,000 people, large number, isn't it?) (1/4 of Canada's population, 10,000,000/40,000,000). The percentage of people who suffer seve…	Positive	Yes	No	No	No	No	2	No
	National	31	Lazemaple	12	11	4	4	and that is considered a credible source? I don't think so! So many law suits out there now because drug companies, tobacco companies covered up and destroyed research data that put their product in a bad light! Even if it were ONE child so afflicted or dead - would you want that one child to be yours? To those with the less than polite replies - what happened to 'free choice'? If you vaccinate y…	Positive	No	No	No	No	Yes		No
	National	31	zookeeperv	11	8	2	15	This sounds a lot like science. Which I could use to spin my anti-vaccination nonsense! "Look! Getting vaccinated puts you at risk of being shot to death!!"	Positive	No	No	No	No	No		No
	National	31	PharmStudHali	25	21	2	4	It is time that boys also be vaccinated. It would be nice to see this covered for patients; as it is quite pricy and that will certainly restrict access. It is a preventative measure, saving the Canadian Healthcare system dollars down the road. Id like to correct some people who are saying this is being driven by BigPharma...totally untrue. Doctors and Healthcare professionals are now recommendin…	Positive	No	No	No	No	No	2	No
	National	31	savant1	9	3	1	6	PharmStudHali "Covered benefits" are paid by taxpayers. If you are a taxpayer, you can pay for the vaccine yourself and save the shuffle of money from taxpayer, to government, to pharmacist. The end result is the same but the cost of admin is gone.	Negative	No	No	No	No	Yes		No
	National	31	SmokeAnotherOne	20	38	1	1	Who are we to blame? Science You are all responsible for your actions. You ya you. I never heard of it ever, i'm sure a lot of poeple just like me never heard of a vacciine called HPV until they read this article. besides it's not a cure for cancer. Because there is no cure for cancer. If you put this stuff in your body, it's your choice. You make your bed you lie in it.	Negative	No	No	No	No	No		No
	National	31	PharmStudHali	13	6	3	4	No talk whatsoever of this being a cure...it has, however, been proven to reduce rates of cancer. You're among the minority if you hadn't heard of HPV. Maybe don't smoke another one..?	Positive	No	No	No	No	No		No
	National	31	zookeeperv	11	3	3	15	Dude, the vaccine isn't called HPV, the virus is (hint: that's what the V stands for). And, if you'd been paying attention to health news for the past 10ish years, you'd have known about the growing number of conditions caused by HPV.	Positive	No	No	No	No	No		No
	National	31	leonswallow	28	27	1	20	this is criminal endangerment of the public http://www.youtube.com/results?search_query=gardasil+dangers&oq=gardasil&aq=9&aqi=g10&aql=&gs_nf=1&gs_l=youtube.1.9.0l10.1968.4375.0.18093.10.8.0.1.1.0.828.1642.2j1j2j6-1.6.0.	Negative	Yes	No	No	No	No		No
	National	31	tree07	29	24	1	1	Its about time that we (men) can be protected from this disease.	Positive	No	No	No	No	No		No
	National	31	savant1	8	10	2	6	Abstinance has proven to work pretty well.	Negative	No	No	No	No	Yes		No
	National	31	Student96	6	4	1	9	Abstinence DOES work well. By gosh, I think you're onto something. Let's extend that every FURTHER: - concussions would go down if people didn't play contact sports... Great! No contact sports from here on out! - motor vehicle accidents would decrease without cars... DONE! No more cars! - infectious diseases wouldn't spread if we didn't have contact with others... SUPER! Protective bubbles for al…	Positive	No	No	No	No	No		No
	National	31	Thanks4Playing	3	3	2	20	tree07, your a very gullible person. have you not done Any research on this subject yourself? ,,,,you'll see. Stay Away. There are no Magic Pills in this world, but Plenty of poisoned apples.....	Negative	No	No	No	No	No		No
	National	31	poopsoup	43	26	1	1	Another bogus money grab by big pharma, ably assisted and abetted by our useless governmen waging a medial war on the poor and ignorant.	Negative	No	No	No	No	No		No
	National	31	petrarch	36	24	4	7	Seriously, Gardasil consists of the viral capsid protein....that's it. There is no genetic material. The riskiest aspect of the vaccine is the needle poke. Hundreds of thousands of girls have been vaccinated already. If the fear-mongers were right, we should all know 10 people who have died. Every class room in Canada should be losing 2 girls a year....	Positive	No	No	No	No	No		No
	National	31	LightsAhead	32	36	2	2	Iceland gives there children 11 vaccinations and have the lowest rate of Autism. Here in North America we give 33 and have the highest rate.	Negative	No	No	No	No	No	1	No
	National	31	zookeeperv	3	2	4	15	Iceland experienced the complete collapse of its financial system, vs. the (comparatively) tame downturn we experienced here. Therefore, total economic meltdown will keep your kids safe from autism. I mean the evidence speaks for itself.	Positive	No	No	No	No	No		No
	National	31	Druid126	1	1	1	3	The study that linked autism with vaccination was proven fraudulent. I'm glad you're not my parent. I'd want someone with a modicum of reasoning to make decisions for me when I was young...	Positive	No	No	No	No	No		No
	National	31	Simple_truth	10	9	3	3	Can any one make a schedule of medical tests and vaccinations one should have every year, against all possible diseases/ailments? And also the costs? (individually and nationally) I am afraid, that we may not have enough days in the whole year, and enough money (assuming 100% of budget is allocated to healthcare) to get these done.	Negative	No	No	No	No	No		No
	National	31	savant1	5	4	3	6	Any chance you could do your own research?	Negative	No	No	No	No	Yes		No
	National	31	LizZardLips66l	35	24	3	3	I would suggest a quick visit to SaneVax.org and check out the 'Gone after Gardasil' article before giving your children another jab...	Negative	Yes	No	No	No	No		No
	National	31	petrarch	38	21	5	7	People seem to only focus on cancer. This vaccine also prevents most genital warts. Will warts kill you? No, but I wouldn't want to have to face my doctor, or anyone else, let alone the pain of trying to have them burned off. To the "Evil Pharma" crowd.....yes, I will concede that some of the business practices leave much to be desired. Companies do try to make money, however they can't make a pr…	Positive	No	No	No	No	No	2	No
	National	31	garnet1245	15	17	3	13	You're right, they can't make a profit by killing their customers, but they can by keeping them alive and in poor health from the medications and vaccinations they give them.	Negative	No	No	No	No	No		No
	National	31	sweetpea333	4	7	1	3	look at your stats before you post . you stated 'most genital warts' and that is not true and I will not tell you the actual number because it is your job to research not mine....	Negative	No	No	No	No	No		Yes
	National	31	zookeeperv	0	1	5	15	^ even a cursory bit of research indicates that genital warts are mostly the fault of HPV.	Positive	No	No	No	No	No		No
	National	31	kildare99	25	56	3	6	How about a vaccine to increase the intelligence of anyone who promotes vaccines. Cancer is a word the industry uses to describe a weakened immune system. So weak that it cannot control the "cancer cell" that every single person has in their body. Toxic vaccines to do improve the immune system. Pay attention to what you eat everyday and watch where your "health" information comes from. Try these …	Negative	No	No	No	No	No		Yes
	National	31	NYSONT	30	21	1	1	As Canadian now living in the U.S., our health insurance started covering boys a couple of years ago. The U.S. miliary has made it part of the recommended vaccination schedule but not yet compulsary. Both my boys, 16 and 11 are now vaccinated. I understand all of the issues that have been raised. I am now working on my Masters of Public Health. It's good to be wary of the pharmaceuticals. However…	Positive	No	Yes	No	No	No	2	Yes
	National	31	Thanks4Playing	4	7	3	20	The needle, and the damage done .....	Negative	No	No	No	No	No		No
	National	31	Thanks4Playing	43	95	4	20	Vaccines are Poison. If you LOVE your children, you will NOT get them vaccinated....for Anything.	Negative	No	No	No	No	No		No
	National	31	aahmed826	37	28	1	1	I don't trust big pharma anymore! OK, I said it. I don't know if this is a strategy to get the whole population covered, hence double their income instantly. My trust in medical and molecular researchers is also decreasing as they are becoming full agents/paid agents of big pharma. (Scientific data gathering is simply sourced from some in exchange for cash). I frequently read about that some are …	Negative	No	No	No	No	No	1	No
	National	31	Mrs. B	31	34	1	1	Sure there are risks, there are risks for reaction with any drug, vaccine or procedure. I personally rather get a vaccine with relatively low risks then to have to expose myself to surgery, radiation or chemotherapy later in life. These all have far greater risk for adverse effects attached to them than the HPV vaccine. Don't make life impacting decisions for your children based on your political…	Positive	No	No	No	No	No	2	No
	National	31	garnet1245	16	3	4	13	Make life-impacting decisions based on rigorous personal research, not on msm or big pharma spin.	Negative	No	No	No	No	No		No
	National	31	sweetpea333	5	0	2	3	Please do your research, I would be devastated to see my child drop dead like other teenagers from the vaccine than to see them detect early stage cervical cancer	Negative	No	No	No	No	No		Yes
	National	31	wessex	54	40	1	2	It's about time this vaccine programme was extended to boys and young men. It made no sense to not vaccinate males. And this decision should be universal. Parents with their own issues about "sex" should not be allowed to prevent their children from have this life-saving vaccine.	Positive	No	No	No	No	No		No
	National	31	kildare99	43	61	4	6	My taxes better not be paying for this bull !	Negative	No	No	No	No	No		Yes
	National	31	Student96	9	5	2	9	My taxes don't want to pay for preventable diseases that get admitted to hospital, like pertussis. I'll tell you what - your tax dollars can go towards treating patients that shouldn't be sick in the first place, and I'll direct MY tax dollars to prevention of those diseases. That way, it'll be a wash and we'll both be happy.	Positive	No	No	No	No	No		No
	National	31	23Chemtrail	30	18	1	1	You'll be sorry ! .....	Negative	No	No	No	No	No		No
	National	31	WilliamD	53	46	2	2	This comment and related replies have been removed by the moderator.	Neutral	No	No	No	No	No		No
	National	31	DBT1979	46	56	4	5	The Anti Big Pharma Campaign is such a joke. These same people posting in this thread would be the first people to line up for some of Big Pharma's $5000 a month un-clinical proven cancer drugs if them or one of their relatives would to get cancer. So here's a challenge. If you wanna prove how much you distrust Big Pharma, then don't take any of their offerings ever. Sit in a circle meditating, e…	Positive	No	No	No	No	No		Yes
	National	31	kildare99	16	24	5	6	Funny but you are right. ANYTHING is better than vaccines and chemotherapy for curing or preventing cancer ! Even burning candles! Now you're getting it !	Negative	No	No	No	No	No		Yes
	National	31	MASSEY JONES	29	97	3	4	This is beginning to look more like science fiction movies, where they take humanoids in a sterile lab and immunize them. There is certainly no need for any HPV immunization for families with solid parenting. and a code of conduct is the norm in a united family. Most kids today are not sexually active till they get married and it's the exception that plays around. An analogy can probably be made …	Negative	No	No	No	Yes	Yes	1	Yes
	National	31	Sir_Will	37	3	3	4	Most kids today are not sexually active till they get married Completely, 100% wrong.	Positive	No	No	No	No	No		No
	National	31	MikeNike	28	1	1	4	Most kids today are not sexually active till they get married and it's the exception that plays around. Were you born in the 1940's. Most kids are very sexually active.	Positive	No	No	No	No	No		No
	National	31	Student96	12	1	3	9	The CDC indicates that 46% of high school kids in 2009 had been sexually active at least once. That's a lot of high school marriages, if your statement is correct. Solid parenting has nothing to do with premarital sex, despite what your moral code might believe. To be honest, I'm actually shocked that you feel that sexual abstinence is the norm in society. Have you been on a university campus? Ed…	Positive	Yes	No	No	No	No		No
	National	31	MASSEY JONES	2	5	4	4	@ Student 96 If you read my post again, you'll find that I recommended that SENIOR boys get vacccinated on a VOLUNTARY basis. If 15 year-olds play around, then it should be determined that they should get the shot. The study recomends vaccinating childr	Negative	No	No	No	Yes	Yes	4	Yes
	National	31	billlahayes	37	88	1	1	Are you people clueless? The HPV vaccine is proven to cause cancer, by design i add. Even the FDA admits it for god sake, it is not just rouge anti-establishment doctors anymore. This is proven fact. Not even talking about the thousands of women gardasil has killed dead in just weeks after taking it. You think the government gives you sweet milk but you don't understand its PURE DEATH.	Negative	No	No	No	No	No		No
	National	31	Student96	9	7	4	9	Even the CDC admits it? Please, demonstrate to me with references. Show me this proven fact.	Positive	No	No	No	No	No		No
	National	31	garnet1245	7	5	5	13	Student96, do your own research. Or better yet, read the previous post that points you to research done by the Weston Price Foundation, Kevin Trudeau, Dr. Mercola (www.mercola.com) and others. And it's all online and free. Btw, how about sourcing your proven facts that Gardasil does all it's hyped to do. From unbiased objective sources of course, not from Merck who stand to make a lot of money fr…	Negative	Yes	No	No	No	No		No
	National	31	zookeeperv	2	4	6	15	^ unbiased like those "references" you just suggested?	Positive	No	No	No	No	No		No
	National	31	garnet1245	4	0	6	13	Yes, zookeeperv, unbiased. The references I cited do not stand to profit by their research. Merck does.	Negative	No	No	No	No	No		No
	National	31	Druid126	83	17	2	3	I still find the logic amusing. "No need to vaccinate boys if we vaccinate girls." Uhh, what about boys that sleep with other boys? There's no protection for them...	Positive	No	No	No	No	No		No
	National	31	wessex	19	9	2	2	You explained the logic perfectly. That's by design.	Positive	No	No	No	No	No		No
	National	31	GabbyG	10	9	5	14	There's no proof whatsoever that the HPV vaccine protects girls or boys in real-world conditions. Considering the risks (increased number of precancerous lesions in vaccinated women; May 2009 - September 2010, 16 deaths, 789 reports of "serious" adverse reactions, 213 cases of permanent disability; and 25 cases of Guillain Barre Syndrome; September 1, 2010 - September 15, 2011, another 26 deaths)…	Negative	Yes	No	No	No	No		No
	National	31	St.Agnostic	4	10	2	4	Interesting comment. However it bemuses me that so called civilized society need to forcefully protect its members, when in reality the ultimate responsibility lies with each individual (regardless of gender). Are you saying that a dubious and ultra-expensive vaccine, with scientifically documented serious ill-side-effects, should be forced upon the population, with the general tax-payers footing…	Negative	No	No	No	No	No		No
	National	31	Student96	9	2	5	9	St..Agnostic: * Please, educate the internet readership on the methods used to eradicate HPV from one's genitals. Soap and water? Irradiation? Dip your genitals in bleach? * Tax-payers are currently footing the bill for people requiring treatment for cervical cancer, anal cancer, penile cancer and some forms of throat cancer, all linked to specific serotypes of HPV. That doesn't even include the …	Positive	No	No	No	No	No		No
	National	31	garnet1245	2	7	7	13	Thank you GabbyG. Now, if only Student96 would shed his pro-vaccine bias, which is obviously not based on objective research from both sides of the argument, but a seemingly messianic trust in allopathic medicine and its big pharma financiers. As well, in 1971, Richard Nixon declared the War On Cancer. Yet, in spite of the billions spent on traditional treatments and research, since then cancer h…	Negative	No	No	No	No	No		No
	National	31	v_mulligan	4	0	2	5	In addition, we need to vaccinate as many people as possible because (a) the vaccine may confer less than 100% immunity, and (b) it's unlikely to reach 100% of whatever population we choose to vaccinate. That is, even if a male were only having sex with females, he'd be relying, first, on all of his partners having been vaccinated, and, second, for the vaccine to have prevented infection in all o…	Positive	No	No	No	No	No	2	No
	National	31	maxmaxry	27	11	1	1	wessexstandard Hide wessex's commentsIt's about time this vaccine programme was extended to boys and young men. It made no sense to not vaccinate males. And this decision should be universal. Parents with their own issues about "sex" should not be allowed to prevent their children from have this life-saving vaccine.. -------------------------------------------------------- i hope all those vaccin…	Negative	Yes	No	No	No	No		No
	National	31	Thanks4Playing	0	0	5	20	Say it ain't so.......get Science Boy on the phone....Immediately !	Negative	No	No	No	No	No		No
	National	31	wagonwould	69	39	1	1	After reading the article, I scrolled down to the comments expecting to see a lot of people saying "this is a good thing!" Then I read things like "vaccines are poison" and "there is certainly no need for any HPV immunization for families with solid parenting." Needless to say, I'm feeling pretty disappointed with commenters right now.	Positive	No	No	No	No	No		No
	National	31	savant1	35	24	4	6	Free HPV vaccine urged for boys? So, is taxpayer money now free? This is a misleading headline. It's like saying the CBC is free.	Negative	No	No	No	No	Yes		No
	National	31	Student96	2	1	6	9	Or treating girls and boys for preventable cancers is free. You are totally hitting that nail on the head.	Positive	No	No	No	No	No		No
	National	31	nexxtep54	23	25	1	1	When we start treating our cancer patients with more dignity and urgency I will believe this vaccine is being offered out of care for our youth and not for big pharma profit.	Negative	No	No	No	No	No	1	No
	National	31	MikeNike	31	32	2	4	I'm shocked to read a story that focuses on boys health. I waited years and years and finally the day has arrived. Its always about women's health. I must go somewhere and ponder this small leap for boys but giant leap for mankind.	Positive	No	No	No	No	No		No
	National	31	rap314	21	9	1	1	And I've waited years and years for people to start including women in "mankind"	Neutral	No	No	No	No	No		No
	National	31	Doctor R	8	10	5	11	Relax. This is only about "boys' health" because it has an impact on women's health. Otherwise, it wouldn't get a mention.	Positive	No	No	No	No	No		No
	National	31	MikeNike	2	6	3	4	rap314 : And I've waited years and years for people to start including women in "mankind" You don't need to be included, your HPV vaccine has been free for years.	Positive	No	No	No	No	No		No
	National	31	zookeeperv	44	25	7	15	My own non-scientific survey of the comments on this story find a direct correlation between use of the phrase "big pharma" in the comment and a lack of facts contained therein.	Positive	No	No	No	No	No		No
	National	31	garnet1245	15	16	8	13	Then maybe you should go back and reread the posts. There is significantly more baseless name-calling and authoritarian do-as-you're-told from the pro-vac posts than there is from the anti-vaccine crowd. It appears you don't engage in critical thinking or doing your own research.	Negative	No	No	No	No	No		No
	National	31	Opinion234	42	13	2	19	A Canadian study's key messages published in the Annals of Medicine show a major discrepancy in vaccine industry claims regarding the safety and efficacy of Gardasil and Cervarix, the two HPV vaccines currently given to girls and boys as young as 12 years old, to prevent forms of cancers associated with HPV. The study reveals: * To date, the efficacy of HPV vaccines in preventing cervical cancer …	Negative	Yes	No	No	No	No	1	No
	National	31	Jof585	5	3	2	4	When the vaccine first came out a few years ago, it was given to young girls between the age of 9 and 12 years old only.	Negative	No	No	No	No	No		No
	National	31	Student96	3	9	7	9	Opinion234: Thank you for providing a link to your information. I hope that it allows for reasoned discussion on the issue. I read that link that you provided, and there were some critiques of the article I would like to point out: 1. Invasive cervical cancer takes 20-40 years to develop, and the article is correct in stating that it is impossible, at this point, to determine the effect of vaccin…	Positive	Yes	No	No	No	No	2	No
	National	31	GordonRobertson	30	50	1	6	wagonwould "Then I read things like "vaccines are poison" and "there is certainly no need for any HPV immunization for families with solid parenting."" There's a reason for the skepticism. It is presumed HPV is causing these cancers, which are normally linked to high risk behavior. Kaposis Sarcoma was listed for the longest time as being caused by HIV until it was discovered in 1994 to be caused …	Negative	No	No	No	No	No		No
	National	31	Ted Smith	17	8	2	5	wow... 1. aids does not need to be cured to demonstrate the effectiveness of antivirals. the mere fact that the patients are not dead demonstrates that the antivirals work (and that the source of illness is indeed a virus). 2. where is YOUR proof that drugs, partying and having multiple partners screws up your immune system? Surely you don't mean to suggest that having multiple partners, per se, …	Positive	No	No	No	No	No		No
	National	31	Doctor R	15	10	6	11	That's right Gord, we weren't vaccinated a few generations back And millions of kids died from polio.	Positive	No	No	No	No	No		No
	National	31	Unexploded	8	5	1	2	http://en.wikipedia.org/wiki/AIDS_denialism That's about as much time as I'm going to put into counter his argument. Medically, it's one of those situations that tends to take care of it's self. Either you come to terms and start on anti-retrovirals (denialism frequently is linked to having been diagnosed) or the problem (and it's host) ceases to exist. As an aside, there are at least four studie…	Positive	Yes	No	No	No	No		No
	National	31	kildare99	5	0	6	6	Whenever someone uses wikipedia as a confirmation of truth...you know they haven't got it figured out yet. Actually that was the one that really shook me up when I realized wikipedia was an unreliable source of objective information. So many examples of this.....especially in what is omitted.	Negative	No	No	No	No	No		Yes
	National	31	Sanity_check	34	33	3	4	The problem I have with this story is the idea that these vaccines should be "free". First of all, they are not free because someone has to pay the drug companies and this way our taxes will go up to pay for them (or the public debt will increase), same with Gardisil & Cervarix. When did these products become the responsibility of the taxpayer? When I get a headache, I find that taking an aspirin…	Negative	No	No	No	No	No		No
	National	31	Ted Smith	15	9	3	5	The issue is this: it is in the public interest for people to get the vaccine because it prevents disease, not to mention the public costs associated with disease/treatment. How do you encourage people to go out of their way to get the vaccine? OFFER it to them for free. An ounce of prevention...	Positive	No	No	No	No	No		No
	National	31	LeBatteur	8	5	1	1	No. Drug companies make more money from chemotherapy drugs than they do from vaccines. It is in the taxpayer's best interest, not to mention it's obviously good public health policy, to prevent cancer using comparatively inexpensive vaccines.	Positive	No	No	No	No	No	2	No
	National	31	Thanks4Playing	3	2	6	20	@ Ted Smith - There is no public interest. Each to his own. No man (woman) can be compelled to harm themselves.	Negative	No	No	No	No	No		No
	National	31	Makinaw Dandy	34	29	1	2	An ounce of prevention is worth a pound of cure. Please go ahead and use my tax dollars to fund this. By the way, I pay a lot of taxes.	Positive	No	No	No	No	No		No
	National	31	Thanks4Playing	5	5	7	20	So, your one of those Well indoctrinated ones eh? Best seek 'reality' help......I would counsel.	Negative	No	No	No	No	No		No
	National	31	Doctor R	25	33	7	11	How could anyone rationally object to preventing cervical cancer in females by making a vaccine available for boys? The costs are minimal compared to the savings in health care, never mind the savings in suffering for many women. Those who argue that people ought to pay for their own vaccine just don't get it. That's like arguing that those who want clean drinking water ought to pay for it, even …	Positive	No	No	No	No	No	2	No
	National	31	outdoors	11	10	1	4	So...the only reason you see fit to vaccinate boy's is to benefit women? Feminist biggot.	Positive	No	No	No	No	No		No
	National	31	Doctor R	8	15	8	11	I am about as far from being a feminst as one can be. But I am a humanist, and if I can lessen the pain and suffering to women by my actions, I will. As it turns out, this will also prevent cancers in men- but if all it did was help women, then it would be immoral not to. And if you'd have bothered to read the entire post, you'd see that I advocated spending money on this to lessen the costs for …	Positive	No	No	No	No	No		No
	National	31	Jof585	16	3	3	4	a disease that always takes the back seat to spending on diseases that affect females What is that supposed to mean ? More women die of heart diseases than all the cancer combine and yet all the research for heart diseases is done on men. It is not only a men disease.	Negative	No	No	No	No	No		No
	National	31	GabbyG	14	6	6	14	There is no proof this vaccine prevents cancer. .Even persistent HPV infections do not generally lead to cervical cancer in the long term; most HPV infections resolve spontaneously within 2 years. "HPV vaccines must maintain a near 100% efficacy for a full 15 years, at a minimum, for cervical cancer to be prevented ... So far, Merck has not conducted any studies, nor are any planned, to evaluate …	Negative	Yes	No	No	No	No		No
	National	31	Doctor R	5	13	9	11	Go look at the figures on the amount spent on brast cancer versus that spent on prostate cnacer- yet as many men die from prostate cancer as females from breast cancer. As for heart disease- this affects both men and women equally, once females are fpast menopause. The research was previously done mainly on men because it was erroneously believed that the disease took the same course in both gend…	Positive	No	No	No	No	No		No
	National	31	garnet1245	2	1	9	13	GabbyG, thank you so much for your wisdom and experience on this subject.	Negative	No	No	No	No	No		No
	National	31	raisinbrandon	43	29	1	1	Being a 21 year old male, it would be nice to have the shot. It would be a huge regret if I ever developed one of these cancers that were entirely preventable. If only I could find the $500 to get the shots. Seems a bit discriminatory, I hope it will change soon.	Positive	No	No	No	No	No	2	No
	National	31	sheldows	11	10	1	2	Don't sleep around then ;) Simple.. Also do you remember when Gardisil first came out, they said it wont work on men, but for some reason they changed their tune. Its all a sham. Nothing will protect people from stupidity.	Negative	No	No	No	No	Yes		No
	National	31	Student96	8	8	8	9	sheldows: I actually have done research on HPV, and was working in that area when the vaccine came out. I don't remember the statement that it would not work on males at all. I would really appreciate a link demonstrating that point. Thank you. Also, as previously pointed out, not 'sleeping around' is a strategy proven not to work (as indicated by the high rate of HPV infections throughout North …	Positive	Yes	No	No	No	No	3	No
	National	31	Thanks4Playing	5	7	8	20	@Student96 - Sure you were...... On the Internet, you can be Anything you want......as many shills claim to be	Negative	No	No	No	No	No	4	No
	National	31	SeriousLi	16	8	1	1	I think its better if they don't use the word "Free", since someone pays the companies in order to get the vaccine in the first place. As said in the previous comments our taxes will go up because of this "Free" vaccine. It is better for us to pay for it ourselves because if the taxes get raised we'll have to pay more if you do all the math. Plus taxes is for everything we buy (e.g. Food, Clothin…	Mixed	No	No	No	No	No	3	No
	National	31	Doctor R	6	5	10	11	Absolute nonsense. We can either pay a miniscule amount for the vaccines, or pay millions more in health care costs to treat the cancers.	Positive	No	No	No	No	No		No
	National	31	Ted Smith	21	22	4	5	Did you know that the prevalence of reality t.v. has exploded in the past decade? If there are indeed more occurences of "rare cancers" today (as opposed to just more diagnoses), then rare cancer and reality t.v. are also correlated! By your reasoning, reality t.v. must also cause rare cancer! omg	Positive	No	No	No	No	No		No
	National	31	Ted Smith	8	7	5	5	p.s. this was a reply to somone claiming that increased rates of rare cancers in children is evidence that vaccination is harmful. accidentally posted it here as a new comment.	Positive	No	No	No	No	No		No
	National	31	Doctor R	5	6	11	11	Thanks Ted- that makes a lot mor sense.	Positive	No	No	No	No	No		No
	National	31	hopeful	22	21	1	2	Of course both sexes should access the vaccine. Vaccinating women won't stop male cancers and won't stop transmission to women from men. A friend is now suffering serious loses because some medication is not as free of side effects as the medical profession thought when she started to take it 8 years ago. Who knew! Since the vaccines are so new, and side effects are therefore unknown, vaccination…	Mixed	No	No	Yes	No	No	3	No
	National	31	St.Agnostic	4	2	3	4	hopeful: While I agree largely with your sentiments, you said: Of course both sexes should access the vaccine. Vaccinating women won't stop male cancers and won't stop transmission to women from men. May I remind you that vaccinating women won't stop male cancers and won't stop transmission TO men FROM women either... Slight but important distinction. ---------- A man's first care should be to av…	Negative	No	No	No	No	No		No
	National	31	PharmStudHali	9	8	4	4	Free isn't accurate but neither is some of what I am hearing here about taxes etc... By "free", what the article should actually be saying is "added to the formulary" /"covered under insurance plans". I don't care which formulary or what insurance plan...if you pay into group benefits through work or if you're covered under a Provincial drug program...if the vaccince were covered through the insu…	Positive	No	No	No	No	No		No
	National	31	Victimology	57	22	1	1	According to CNAD.ca: 70% of women with HPV infection clear it spontaneously within one year; 90% within two years. There are fifteen types of HPV that might cause cancer. Gardasil was developed to address only four types (the list in this article only addresses statistics from two). Gardasil is being marketed a being "anti-cancer". There are other factors that increase the risk of cervical cance…	Negative	Yes	No	No	No	No	1	No
	National	31	MikeNike	8	2	4	4	Smokers pay plenty of tax to treat illness.	Positive	No	No	No	No	No		No
	National	31	sweetpea333	9	4	3	3	Thank you for posting this, I hope it helps others make their choice!	Negative	No	No	No	No	No		Yes
	National	31	RayFarrell	0	4	1	1	Even if the vaccine is not entirely effective, or wears off, or has some percentage chance of causing ill side-effects (as all drugs do), its still a good idea. Some cancers will be prevented. Even better, because this vaccine addresses a comunicable disease, your vaccine or mine may prevent not only our own cancer, but someone else's. And as the prevalence of the disease is reduced in society, t…	Positive	No	No	No	No	No	2	No
	National	31	InheritTheWind	36	37	1	1	If you don't believe in taking vaccines for whatever reason...........don't take them......it's no big deal...... I doubt if anyone in here really cares if you do or you don't. I know I don't.............your choice..........your funeral.....as they say.	Positive	No	No	No	No	No		No
	National	31	Thanks4Playing	12	17	9	20	Unlike you son, I DO care what happens to people......and I Don't want to see them poisoned. NO Vaccine is good for you now adays. Maybe when the medical system was Honest.....and genuinely Tried to make people better so many long years ago.....but today?, they have been infiltrated and taken over by Demons who wish only to cause suffering, pain and death.....as they worship one of the 4 dark god…	Negative	No	No	No	No	No		No
	National	31	maybe-not	53	29	2	2	What about, as yet undisclosed, harm to children's long term well being? Who will be held accountable?	Negative	No	No	No	No	No		No
	National	31	St.Agnostic	12	7	4	4	Ultimately, the parent obviously! Would you trust your life or those of your offspring to some anonymous career bureaucrats or scientists? The problem with our society is most people pass the buck and abscond their responsibilities. ---------- Risk comes from not knowing what you're doing. -- Warren Buffett The real problem is not whether machines think but whether men do. -- B. F. Skinner Follow…	Negative	No	No	No	No	No		No
	National	31	Student96	5	10	9	9	If it's undisclosed long-term harm, how do you know that it exists?	Positive	No	No	No	No	No		No
	National	31	garnet1245	6	6	10	13	@Student96, How do you know that long-term harm doesn't exist? You really seem overzealous to push a vaccine that, according to GabbyG and others, who have done extensive research into Gardasil has some serious side effects. Are these folks pathological	Negative	No	No	No	No	No	4	No
	National	31	sheldows	38	51	2	2	This Vacine doesn't work especially for boys. Even when it came out thay indicated it does not work for boys. Also a lot of people having problems with this Vacine. Why waste tax payers money on this crap? Just a money grab by Garbasil Also not everyone sleep around. So this is not needed. And people get stuck with the side effects.	Negative	No	No	No	No	Yes		No
	National	31	dlynb91	13	8	1	1	Males are also carriers of HPV. It makes sense to vaccinate them to prevent the transmission of HPV.	Positive	No	No	No	No	No		No
	National	31	camerond3	32	41	1	1	This is a vaccine I do believe in, HPV is a mean virus.	Positive	No	No	No	No	No		No
	National	31	Thanks4Playing	12	12	10	20	And why do you Believe this ? Because Momma told you so ?	Negative	No	No	No	No	No		No
	National	31	GordonRobertson	34	19	2	6	victimology "There are other factors that increase the risk of cervical cancers...." Not only cervical, but all cancers. Cancers are a problem with cell division yet cancer is being regarded as a problem with various organs at a macro level. People are given deadly poisons to kill tumors rather than treating the cancer where it begins. With all the research going on with DNA and cells, why is the…	Negative	No	No	No	No	No		No
	National	31	baf8727	8	9	1	1	Whatever about the merits of the vaccine in men, the Canadian Cancer Advocacy Coalition is funded by the pharmaceutical industry. Any reportage by the CBC of material published by this group should disclose this conflict of interest to listeners.	Negative	No	No	No	No	No		No
	National	31	Slinky807	39	21	1	1	Give a few more years and Monsanto will want to control everything and everyone.	Negative	No	No	No	No	No		No
	National	31	Hamilton77	42	51	1	1	Masters of the Universe like Bill Gates have been pushing for global population control. ( go to Youtube "Bill Gates wants 1 Billion dead" ) This Gardasil garbage just might bring sterility !	Negative	Yes	No	No	No	No	1	No
	National	31	Thanks4Playing	10	6	11	20	actually, its on the order of 6.5 Billion as per the Georgia Guide Stones, but yes, you are correct.	Negative	No	No	No	No	No		No
	National	31	CBCfanzine	14	57	1	1	This comment and related replies have been removed by the moderator.	Neutral	No	No	No	No	No		No
	National	31	Seeingblue	24	49	1	2	Advisory Committee on Immunization recommended HPV vaccination for males aged nine to 25. So in this liberated age we now expect 9 year old boys to have sex?	Negative	No	No	No	No	No		No
	National	31	Jof585	14	0	4	4	When the vaccine was introduced a few years ago it was given to girls between the age of 9 and 12.	Negative	No	No	No	No	No		No
	National	31	Aarrgh	14	5	1	1	The idea is to vaccinate people before they become sexually active and PREVENT them from contracting hpv. Not much point in vaccinating people who are statistically likely to already be hpv positive once they are sexually active. From an epidemiological and probabilistic standpoint, vaccinating males may make sense even if only to protect females who didn't get vaccinated.	Positive	No	No	No	No	No		No
	National	31	Thanks4Playing	8	18	12	20	Caught that did ya, Good. The Dark Globalists want to roll that number even further back.....WAY back.	Negative	No	No	No	No	No		No
	National	31	dongillis	7	11	1	2	Get them while they are young and can't object !! Idiotic !	Negative	No	No	No	No	No		No
	National	31	v_mulligan	6	0	3	5	No, if we expected 9 year old boys to have sex, we'd be vaccinating at 5. The whole point is to vaccinate them BEFORE they're having sex. Whether you approve or not, half of them will have had sex by age 16. Half will have had oral sex (a route by which HPV can be transmitted) by 14. Yes, 9 makes perfect sex.	Positive	No	No	No	No	No		No
	National	31	Required Fields	3	1	1	19	Other vaccines such as MMR and Tetanus/Diphtheria booster shots are given to kids at 9 years old. It makes sense to do HPV at the same time instead of setting up extra clinics or school visits.	Positive	No	No	No	No	No	2	No
	National	31	Thanks4Playing	49	61	13	20	Gardasil is a vaccine intended to prevent certain types of HPV that are known to increase the probability of cervical cancer has been linked to a number of deaths as well as other severe side effects. Reported Gardasil Dangers include misscarriage, the development of Guillian Barre Syndrome, Anaphylaxis, Speech Impairment, and Seizures. as well as other permanent and sometimes deadly Gardasil Dan…	Negative	No	No	No	No	No		No
	National	31	reform	59	40	1	1	Beware the pharmasuicide industry. Their hidden motto is "patients for life". Have they come up with a cure for anything? They continue to unleash a blizzard of dangerous drugs to treat symptoms, while never actually putting an end to any disease. Too profitable this way. Protect your children ; research everything carefully. And remember: your doctor was trained by big pharma. Never put all your…	Negative	No	No	No	No	No		No
	National	31	kkerk32	13	19	1	1	Your last comment "learn to be an educated consumer" is the only one that makes sense in your entire message. Doctors ARE NOT trained by "big pharma" companies, and your insinuation is doing nothing but revealing your ignorance.	Positive	No	No	No	No	No		No
	National	31	GabbyG	9	6	7	14	To kzwicker: Take a look at medical school textbooks with their pharmaceutical ads.	Negative	No	No	No	No	No		No
	National	31	Thanks4Playing	48	65	14	20	Speaking of Vaccines, The Dangers of Vaccines - Part 1 (Autism SIDS MMR HPV Gardasil H1N1 Thimerosal) http://www.youtube.com/watch?v=tyaVxYYVfQE&feature=youtube_gdata	Negative	Yes	No	No	No	No	1	No
	National	31	v_mulligan	15	8	4	5	One paper reported a tenuous link between the measles/mumps/rubella vaccine and autism. Andrew Wakefield, the lead author of that study, was proven to have falsified his data, and the paper was retracted; he has now lost his medical licence and may face criminal charges. At least seventeen follow-up studies tried to duplicate his findings; all found no link whatsoever between vaccination and auti…	Positive	No	No	No	No	No		No
	National	31	leonswallow	9	2	2	20	v mulligan you knowledge is substandard Dr Wakefield was cleared and is now suing try to keep up http://www.infowars.com/gardasil-exposed-deadly-vaccine-pushed-on-millions-of-young-boys-and-girls-worldwide/	Negative	Yes	No	No	No	No		No
	National	31	DEEMON666	51	65	1	1	I won't go near that vaccine with a ten foot pole. If anything, its for girls not boys. How many men do you know with penile cancer?.....I know zero....I'll take my chances. This is political polarized propaganda at its best. ........penile cancer?....what next?	Negative	No	No	No	No	No	1	No
	National	31	v_mulligan	9	3	5	5	Even setting aside the benefit to me (and yes, preventing penile cancer sure sounds like a pretty good benefit), I'm willing to take a jab in the arm if it means that I won't be causing cervical cancer in a partner whom I care about. Are you saying that's not a benefit?	Positive	No	No	No	No	No	2	No
	National	31	dongillis	54	50	2	2	This is absolutely ludicrous ! What percentage of ALL cancer do the 4 listed above make up ? From what I have heard in reports , there is more danger in taking the vaccine than in not taking it ! Merck must have awfully big pockets to keep all these medical doctors in. Big Pharma has struck again, and with the support of paid-off MDs, has successfully lobbied our government into spending millions…	Negative	No	No	No	No	No	1	No
	National	31	vaccinenurse	1	1	1	3	HPV is not mandatory for girls, it is an optional vaccine.	Positive	No	No	No	No	No		Yes
	National	31	Stay tuned	19	10	5	8	If Canadians had one less new jet to pay for we would live longer!	Positive	No	No	No	No	No		No
	National	31	johndark	37	26	1	1	I'm not going to tell anyone what to do with their children here but before you vaccinate them please go to youtube and search up "gardasil side effects" and please watch the countless amount of videos posted and then decide what is best for your children.	Negative	Yes	No	No	No	No		No
	National	31	vaccinenurse	4	6	2	3	Don't think I would use youtube to make a medical decision for my child.	Positive	No	No	No	No	No		Yes
	National	31	mach01	7	18	1	1	We could afford this if Harper would quit going to ball games. Penile Cancer? Ouch, thats a new one? I wouldn't get it.	Negative	No	No	No	No	No		No
	National	31	_BlockedforHarp	21	13	1	1	Maybe conservative governments will ban premarital sex, since they know that premarital sex causes all sorts of bad things to happen.	Neutral	No	No	No	No	No		No
	National	31	zookeeperv	0	0	8	15	Bad things? Because that has *not* been my experience.	Positive	No	No	No	No	No		No
	National	31	Algorail	8	5	1	1	It will happen. The majority of parents who have immanent fear that their boys will get HPV by Wednesday morning, will go out and buy it. After a week or so when Health Canada figures out who still has a job, everyone will have free access to it.	Neutral	No	No	No	No	No		No
	National	31	simone36	54	33	4	5	As a nurse and mother of 3 boys 6 and under I can assure you I won't allow this vaccine to be given to my sons. I would not even allow it to be given to my daughter if I had one. This vaccine was fastracked without proper trials being done on it. One of the scientists that was on the team that created it feels it is unsafe. Cervival cancers are not even diagnosed until women are at least in their…	Negative	Yes	Yes	No	No	No	1	Yes
	National	31	Skyhawk_	18	15	1	16	Cervival [SICK] cancers are not even diagnosed until women are at least in their 40's making it unknown if this vaccine will even work. ----------------------- The median age for cervical cancer id 47. That's the year in which half of cases are younger, and half are older. While fairly rare in women in their 20s, many women in their 30s die from cervical cancer. http://www.cdc.gov/Features/dsCerv…	Positive	Yes	No	No	No	No	2	Yes
	National	31	jlf975	46	31	1	1	I question how CBC can publish an article without mentioning all the widespread contraversy over the terrible side effects this drug is having. Stop being a cheerleader for big pharma - it's embarassing.	Negative	No	No	No	No	No		No
	National	31	garnet1245	8	5	11	13	@jlf975. Sadly, cbc is part of the mainstream media's disinformation campaign (although there are aspects of its programming, such as Rick Mercer, who tend to counteract this trend). Back when all of the US msm media were hawking the lie of Saddam Hussein	Negative	No	No	No	No	No	4	No
	National	31	zookeeperv	2	6	9	15	They don't mention it because there is no widespread controversy. Doctors and researchers across the world support the vaccination of children against potentially fatal diseases. A handful of contradictory website does not a controversy make. I can make a website saying we never landed on the moon - doesn't make it a widespread controversy.	Positive	No	No	No	No	No		No
	National	31	Bethoughtfull	28	18	1	1	Since the non-event H1N1 mediademic nobody trusts anything these learnered scholars come up with. It's more a show me then I believe you rather than trusting opinion. Sorry Docs most people know it's beyond you and their guess is a good as yours.	Negative	No	No	No	No	No	1	No
	National	31	steve2345	24	43	1	1	I havint been immunized since i was a kid and rarely get sick. I dont know if its because of the people around me have been immunized, or just a strong immune system. either way it let you guys be the guinea pig.	Negative	No	No	No	No	No	1	No
	National	31	Skyhawk_	13	9	2	16	I often travel because of my work and the reason why I keep up my shots such as hep a, b, tetanus , etc. is because I DON'T want to be the guinea pig. Feel free to "go back to nature" and live an average long life of 40 years old. Just please quarantine yourself from the rest of us who accept modern science.	Positive	No	No	No	No	No		Yes
	National	31	Required Fields	6	5	2	19	There's nothing magical about your immune system. You probably don't get sick because everyone else got the vaccine and there's nobody for you to catch an illness from.	Positive	No	No	No	No	No		No
	National	31	sbrilz1978	34	21	1	1	Seriously people, if you have ever had people die of cancer that you care about , you would get this vaccination. People are bitching about side affects, this can save the lives of our children. Of course boys should be able to get this. Why is it more important to only save the woman's reproductive system. It should be free to everyone! We live in Canada where we believe in equality! Why should …	Positive	No	No	No	No	No	2	Yes
	National	31	savant1	2	4	5	6	sbrilz1978 The vaccine is available to you for your son. Get it if you want it. Just don't expect someone else to pay for it.	Negative	No	No	No	No	Yes		No
	National	31	Dr. Joe	33	31	1	2	Gotta love an nice vaccine article first thing Monday morning. The crazies are out in full-effect with the conspiracy theories, autism rants, etc. The are the same people who will look to the medical system to save them when they get sick and are dying. Hopefully the anti-vaccers all get a vaccine-preventable disease and die a horrible death. But at least you didn't get vaccinated! Take that Big …	Positive	No	No	No	No	No		Yes
	National	31	brucecification	30	29	3	5	The vaccine has been tested on handpicked groups (2, 13). These are not representative of the groups who have been, or will be vaccinated. Exclusion criteria: 1) Allergies to any component of the vaccine 2) History of a severe allergic reaction 3) Known history of any allergies to food or medicine 4) Immunocompromised, Immunodeficient or has an autoimmune condition 5) History of any condition, th…	Negative	Yes	No	No	No	No	1	No
	National	31	Science Boy	5	13	1	23	More antivaxxer nonsense. Adverse events that occur in association with a given treatment are not necessarily CAUSED by the treatment, and given that the overwhelming majority of the adverse events associated with HPV vaccine were mild and were reports like "pain at injection site" and "fainting", most of these would have occurred had you been injecting saline into the same people. As to the deat…	Positive	Yes	No	No	No	No	2	Yes
	National	31	leonswallow	10	4	3	20	Once again science fraud tries to decieve the uneducated sheep now a real doctor unlike the fraud science fraud http://www.infowars.com/the-dangers-of-gardasil-with-dr-russell-blaylock/	Negative	Yes	No	No	No	No		No
	National	31	savant1	16	16	6	6	The problem with "free" is that you will eventually run out of other peoples money. ORNGE and eHealth management fiascos are just two examples.	Negative	No	No	No	No	Yes		No
	National	31	Mamanofthree	1	0	2	6	Well said!	Negative	No	No	No	No	No		Yes
	National	31	Science Boy	44	32	2	23	So, if you lived in, say Indonesia and you heard there was a large earthquake offshore that might or might not result in a tsunami would you: a) get to high ground as quickly as possible, knowing that a devastating tsunami is unlikely, but possible b) stay put, accepting that there is a chance of death but you're still willing to play the odds c) assume the earthquake reports are some sort of gov…	Positive	No	No	No	No	No		Yes
	National	31	Puckerup	26	18	1	1	takes 2 to tango. most cases the guys are the carriers. good call!	Positive	No	No	No	No	No		No
	National	31	Thanks4Playing	27	39	15	20	Cheaper bulk purchases ? Poison is poison.....regardless of the price. STAY AWAY !	Negative	No	No	No	No	No		No
	National	31	cajun1957a	22	8	1	1	Health officials in several provinces told CBC News they're reviewing whether to cover the injections for boys Why on earth would Health officials even review covering the costs for boys? If it is like many other issues in this country,males need not apply.	Negative	No	No	No	No	No		No
	National	31	simone36	23	29	5	5	Before all the hysteria. According to Health Canada Cervical cancer accounts for 2% of new cancer cases, and that is a 2004 stat. They also state in another document that the rate has decreased by 2% each year from 1995-2004. There has been a steady decline in this type cancer since the 1970's due to screening and treatment of early changes.(see Health Canada's site). This does not seem to be eno…	Negative	Yes	Yes	No	No	No		Yes
	National	31	Thanks4Playing	22	31	16	20	Bill Gates must be Loving this.......wonder whats in the injection.......	Negative	No	No	No	No	No		No
	National	31	WesternSpring	29	23	1	1	Yeah, I'll have to agree with my nutty Dipper cousins and their anti-pharmaceutical stance on this one. I think I'll pass on injecting my child with this concoction.	Negative	No	No	No	No	No		Yes
	National	31	NotHere	41	23	1	8	This shot contains aluminum hydroxyphosphate sulfate (neurotoxin), L-histidine, polysorbate 80 (causes infertility in mice), sodium borate (borax, possible carcinogen) http://www.cdc.gov/vaccines/pubs/pinkbook/downloads/appendices/B/excipient-table-2.pdf Further more Merck states that: "GARDASIL has not been demonstrated to provide protection against disease from vaccine and non-vaccine HPV types…	Negative	Yes	No	No	No	No	1	Yes
	National	31	Skyhawk_	42	31	3	16	I urge you NOT to risk your child's very life with this vaccine!!!! Our daughter had extremely serious side effects. She suffered a little bit of soreness at the injection site for almost an hour after her shot, and a little itchiness there for nearly half an hour longer! Spread this news to everyone you know so they can learn the truth of this evil vaccine. Thank goodness our child survived with…	Positive	No	No	Yes	No	No	2	Yes
	National	31	zookeeperv	17	14	10	15	My condolences that your child had to endure this torture. You're right, we should avoid following the advice of medical professionals the world over so that NOT ONE MORE CHILD has to endure the itchies!	Positive	No	No	No	No	No		No
	National	31	zookeeperv	8	11	11	15	Or, god forbid, an owie!	Positive	No	No	No	No	No		No
	National	31	NotHere	32	26	2	8	From the Journal of the American Medical Association: "The theory behind the vaccine is sound: If HPV infection can be prevented, cancer will not occur. But in practice the issue is more complex.: First, there are more than 100 different types of HPV and at least 15 of them are oncogenic. The current vaccines target only 2 oncogenic strains: HPV-16 and HPV-18. Second, the relationship between inf…	Negative	Yes	No	No	No	No		Yes
	National	31	Science Boy	21	20	3	23	The current vaccines target the most common strains, but yes we'll want to get them all eventually. As to the long term studies... yes, we'll want to do those. That's not an argument against vaccination, but is an argument for ascertaining effectiveness of a preventative therapy. But what process would you propose for preventative therapies? In any case, all of the major medical bodies are strong…	Positive	No	No	No	No	No		Yes
	National	31	NotHere	23	21	3	8	Science boy.. There are preventative therapies in place: 1. Your own immunity will take care of 90% of HPV infections. "70% of all HPV infections resolve themselves without treatment within a year. Within two years, the number climbs to 90%. Of the remaining 10% of HPV infections, only half will develop into cervical cancer." 2.Pap smear. "Regardless, in the past four decades, industrialized coun…	Negative	Yes	No	No	No	No		Yes
	National	31	leonswallow	23	35	4	20	worth the read there your kids at risk http://www.infowars.com/gardasil-exposed-deadly-vaccine-pushed-on-millions-of-young-boys-and-girls-worldwide/	Negative	Yes	No	No	No	No		No
	National	31	leonswallow	21	33	5	20	v mulligan wrote commentsOne paper reported a tenuous link between the measles/mumps/rubella vaccine and autism. Andrew Wakefield, the lead author of that study, was proven to have falsified his data, and the paper was retracted; he has now lost his medical licence and may face criminal charges. At least seventeen follow-up studies tried to duplicate his findings; all found no link whatsoever bet…	Negative	Yes	No	No	No	No		No
	National	31	Science Boy	18	12	4	23	ya, nothing like a prison planet blog to put an argument to rest. .. if you're a tin foil hat wearing conspiracy theorist, I mean.	Positive	No	No	No	No	No		Yes
	National	31	Mamanofthree	10	13	3	6	You are obviously not very well up to date in your data. Have you even read the report from Brian Deer (the journalist who brought to light Wakefield's supposed fraud). Did you read Wakefield's reply (Callous Disregard) and his defence? Did you know that Wakefield is currently suing Deer for defamation? Did you know that the BMJ has reinstated John Walker-Smith (the Lancet's case study co-author)…	Negative	No	No	No	No	No		Yes
	National	31	leonswallow	8	12	6	20	mamamofthree you must be talking about science fraud I posted Wakefield lawsuit	Negative	No	No	No	No	No		No
	National	31	Siamese101	26	38	1	1	The Gardasil vaccine is THE most toxic and the most dangerous vaccine on the market. Sure, you can believe a $500 will help protect against cervical cancer but if you spend that $500, it will cost much more in the long run because of its side effects. How beneficial is it to our children's health to have them injected with aluminum, Thimerosal, formaldehyde, medical equipment disinfectant, soil f…	Negative	No	No	No	No	No	1	No
	National	31	Science Boy	20	17	5	23	What a load of crap. Show me one study that suggests any such thing. The truth is that this vaccine is both safe and proven effective. http://www.cdc.gov/vaccinesafety/Vaccines/HPV/gardasil.html You've been listening to conspiracy nonsense and should be ashamed of yourself for spreading misinformation for a potentially life saving and innocuous treatment.	Positive	Yes	No	No	No	No		Yes
	National	31	Mamanofthree	14	17	4	6	Thank you for your post. People need to read the vaccine inserts, and learn what all those fancy ingredients are. People also need to read the listed side effects before rolling up their sleeves or worse, their children's sleeves. For those who question the "science" or facts of your claims, please go to your local library and consult the Physician's Desk Reference. This is your doctor's bible, t…	Negative	Yes	No	Yes	No	No	1	Yes
	National	31	JessDD	24	10	2	3	In response to Lazemaple's comment ("Even if it were ONE child so afflicted or dead - would you want that one child to be yours?"): Yes, I would be perfectly fine with that one child being mine, as it is something out of my control. It is far less likely that the one child dying will be the one vaccinated than the one not. And inb4 "you have no idea what its like to lose a child," I have gained a…	Positive	No	No	Yes	No	No		No
	National	31	GordonRobertson	7	39	3	6	reform "Beware the pharmasuicide industry. Their hidden motto is "patients for life"". That warning has been issued recently by Matthias Rath in Germany and by former pharmaceutical researcher. Rath has been taken to court by pharmaceutical interests for pushing vitamins as important factors in health. The judge hearing the case in Germany was so impressed by Rath that he referred to him as a pio…	Negative	Yes	No	No	No	No		No
	National	31	petrarch	33	17	6	7	Can any of the anti-vaxxers point out one substantiated case of someone dying from a vaccine? Not just someone who died after getting a shot....like the girl in England who died after getting the Gardasil shot....it turned out she had a heart tumor, completely unrelated. Lots of wild accusations, but no evidence. However, there are many documented cases of people dying from completely preventable…	Positive	Yes	No	No	No	No	2	No
	National	31	Mamanofthree	10	15	5	6	For severe injuries: For Gardasil, look up Gabby Swank. For childhood vaccinations: look up Hannah Polling For deaths, check out the VAERS website.	Negative	Yes	No	No	No	No		Yes
	National	31	petrarch	11	8	7	7	VAERS is self reported....remember, one guy claimed the H1N1 vaccine turned him into the Incredible Hulk. Hannah Polling was a court case no? It wasn't proven. Gabby Swank got sick after a shot....doesn't mean the shot caused it. There is no proof.	Positive	No	No	No	No	No		No
	National	31	GordonRobertson	16	39	4	6	leonswallow ...from your link... "...the CDC did not agree, boasting about the anti-cancer effects of Gardasil and even going as far as to recommend it to girls as young as 9. Dr. Harper says that 70% of all HPV infections resolve themselves within a year, and within 2 years the percentage climbs to 90%..." I think the CDC are very dangerous. Any health organization that manipulates statistics to…	Negative	Yes	No	No	No	No		No
	National	31	Science Boy	18	9	6	23	The CDC is DANGEROUS? What an idiotic thing to say. The CDC is directly responsible for saving millions of lives through its various valuable programs. The CDC does not "manipulate statistics". Your HIV statements are clearly driven by some sort of religious lunacy rather than any scientific evidence, which puts you in exactly the opposite camp of the CDC. In short, you have no idea what you're t…	Positive	No	No	No	No	No		Yes
	National	31	Skyhawk_	15	5	4	16	@Science Boy, It should also be noted that David Rasnick had nothing to do with developing antivirals of any kind, and in fact has not undertaken research in anything AIDS/HIV related. He's just a well known AIDS denier and conspiracy theorist, and is as	Positive	No	No	No	No	No	4	Yes
	National	31	MountainMomma7	34	6	1	1	Whether you believe in vaccination or not, the fact is that this is an unequal distribution. Boys have every right as girls to have the vaccine available and paid for by the province. Equality works both ways.	Positive	No	No	No	No	No		No
	National	31	Skyhawk_	34	19	5	16	GordonRobertson wrote: "That warning has been issued recently by Matthias Rath in Germany and by former pharmaceutical researcher. Rath has been taken to court by pharmaceutical interests for pushing vitamins as important factors in health." ------------------- Matthias Rath was in court not because he was promoting vitamins for good health, but because he was touting vitamin C as a cure of HIV/A…	Positive	Yes	No	No	No	No		Yes
	National	31	brucecification	21	28	4	5	HPV (Human Papilloma Virus) & Cervical Cancer Vaccine: Merck's Gardasil® December 2007 Overview In Canada, the funding of a new Human Papillomavirus (HPV) vaccine program—as detailed in the 2007 federal government budget—is making Canadian taxpayer history; it's the costliest vaccine yet. Are we getting value for our money? What unknown health risks will young girls face who submit to this vaccin…	Negative	Yes	No	No	No	No	1	No
	National	31	Mamanofthree	9	16	6	6	Why am I not surprised... thanks for the info.	Negative	No	No	No	No	No		Yes
	National	31	Skyhawk_	13	6	6	16	FDA documents reveal HPV vaccine may increase your risk of cancer if you already have HPV. In trials, Gardasil increased risk by 44.6% of developing high-grade precancerous lesions in women who are already sero-positive and PCR-positive for vaccine-relevant genotypes of HPV. ------------------------------------------------- The FDA report says no such thing. http://www.fda.gov/ohrms/dockets/ac/06…	Positive	Yes	No	No	No	No		Yes
	National	31	brucecification	19	30	5	5	Infant Vaccines Produce Autism Symptoms in New Primate Study by University Of Pittsburgh Scientists Routine Safety Study That Government Scientists Refused to Do Illustrates Vaccine Program and Mercury Health Risks Atlanta, GA: Findings released today showed that infant monkeys given vaccines officially recommended by the CDC and the American Academy of Pediatrics (AAP) exhibited autism-like symp…	Negative	Yes	No	No	No	No	1	No
	National	31	Science Boy	18	9	7	23	Okay, I went to that site because this sounded pretty fishy to me, and it referred to some other site for the paper. That site had no reference for the paper, noting instead that this is just an abstract at a conference, not a peer reviewed paper. So what are we to make of this alleged finding? What exactly do they mean by "autism-like" behaviours? And who did this study exactly and what was the …	Positive	No	No	No	No	No		Yes
	National	31	vaccinenurse	17	10	3	3	Typical! Everyone who bashes vaccines can never provide a legitamit refrence, it always leads to a dead end! Good try.	Positive	No	No	No	No	No		Yes
	National	31	leonswallow	8	16	7	20	Oh come on now science fraud you wouldn't know real science if you tripped over it... shame on you big pharma shill	Negative	No	No	No	No	No		No
	National	31	Science Boy	9	9	8	23	leonswallow: ON the contrary. I just tripped over some science papers and I recognized them for what they were right away. But nevertheless from now on I'll make sure to run all my scientific ideas past you before beginning a study. you being the scientific expert you obviously must be, I'm sure your input will be invaluable.	Positive	No	No	No	No	No		Yes
	National	31	leonswallow	7	3	8	20	science fraud what you mean is you found more propaganda from the pharma company thats paying you and your going to push that garbage on the unsuspecting sheep	Negative	No	No	No	No	No		No
	National	31	leonswallow	21	32	9	20	science fraud once again you try to decieve the sheep the CDC has no credibility like you has been bought and paid for like you	Negative	No	No	No	No	No		No
	National	31	Science Boy	19	5	9	23	Well, if I've been bought and paid for I hope someone got a good price. Does seem a bit unfair, though, that I didn't get to see any of that money.	Positive	No	No	No	No	No		Yes
	National	31	NotHere	23	38	4	8	I am just reading a Gardasil background document and I am surprised I have not heard this earlier: If you have been exposed to HPV 16 or 18 before vaccine injection, you increase your risk of precancerous lesions by about 45%. http://www.fda.gov/ohrms/dockets/ac/06/briefing/2006-4222B3.pdf (pg. 13) "There were some concerns regarding primary endpoint analyses among Subgroups: 1. There were two im…	Negative	Yes	No	No	No	No	2	Yes
	National	31	Skyhawk_	32	21	7	16	Are you selective quoting because you have an agenda, or did a lack of time make it difficult for you to read the next page of the report? The small subgroup was then analyzed for factors influencing incidence other than the use of Gardasil or the placebo. The results are summarized in Table 18 on page 14 of the report. According to this further analysis in Table 20, it seems that Gardasil actual…	Positive	Yes	No	No	No	No	2	Yes
	National	31	NotHere	14	32	5	8	Skyhawk.. My only agenda is to find out how safe this particular vaccine actually is for my children. I refuse to buy in to manufacturing marketing and advertising. This debate, and every parent's personal research is necessary. No one can show me a scientific study that shows this vaccine actually prevents and does not cause cancer or other side effects 20 years from now. No one can, since this …	Negative	No	No	No	No	No	1	Yes
	National	31	Skyhawk_	27	12	8	16	NotHere wrote: "My only agenda is to find out how safe this particular vaccine actually is for my children." ----------------------- Then why are you selectively quoting the FDA report out of context, and claiming the report says the exact opposite of its published findings (shown on page 14)? I'm curious at to what would motivate you to do that.	Positive	No	No	No	No	No		Yes
	National	31	skretn	15	21	1	1	Skyhawk_ Who cares what NotHere's motivation is. It's part of a discussion in which people can take whatever they want from the data. Keep your replies to the point. No one enjoys being picked on. Different points of view means the data tells a different story to others. I tend to be less trustful off the bat as "the applicant" also conducted the study. That kind of research is in the "trust but …	Negative	No	No	No	No	No		No
	National	31	GordonRobertson	16	41	5	6	skyhawk "Matthias Rath was in court not because he was promoting vitamins for good health, but because he was touting vitamin C as a cure of HIV/AIDS ..." You are not responding here to be informative, you have a habit of trolling me to counter anything I say with innuendo. Why don't you get your own material? Rath was in court in Germany because German pharmaceutical companies objected to his cl…	Negative	No	No	No	No	No		No
	National	31	leonswallow	3	25	10	20	he has even less knowledge of global warming ask him .... never ceases to amaze me where he pull his numbers from .... but he'll try to tell you he's the expert in that tooooooo	Negative	No	No	No	No	No		No
	National	31	Tethys	15	5	1	1	AIDS (Acquired Immunodeficiency Syndrome), robertson your stupidity often overwhelms. See the word "Acquired"?, the HIV virus attacks the immune system , making the patient more susceptible to opportunistic infections which worsens over time.	Neutral	No	No	No	No	No		No
	National	31	garnet1245	28	39	12	13	Nice try yourself Skyhawk. Merck did all of the tests and then submitted them to the FDA for rubber-stamp approval. Of course, we can trust Merck 100% that they wouldn't fudge test results because they stand to make mega-bucks if their vaccine is approved. Sorta like letting the Phd candidate mark his own thesis. It's obvious whose best interests you have at heart.	Negative	No	No	No	No	No		No
	National	31	Science Boy	34	13	10	23	Lordy. Have you ever participated in an FDA audit? I have, and I can tell you that the level of scrutiny on industry studies is extreme.... far beyond anything that would ever be contemplated in academic research. There are sophisticated controls for data entry and layers of checks in ensuring that data in the database is entirely accurate. Unblinding of data only occurs after the data base is lo…	Positive	No	No	No	No	No		Yes
	National	31	garnet1245	14	25	13	13	Science Boy. We only have your word that you participated in an FDA audit. And so what if you did? So you are saying there are no corrupting influences in the FDA? How do you know that, when it is common knowledge that the FDA and Big Pharma are in bed and totally corrupt, in fact going out of their way to persecute organic farmers, and prevent the labelling of GMO products. The evidence is overw…	Negative	No	No	No	No	No		No
	National	31	Science Boy	18	10	11	23	Common knowledge that the FDA and big pharma are in bed together, is it? Laughable. Pharma companies are forever complaining about how overly strict the FDA is. And given that only 1 out of every 10 drugs that enters the clinic is approved for clinical use one wonders what kind of corrupt arrangement you think has been made between the FDA and pharma. Or didn't you know that very few drugs are ac…	Positive	No	No	No	No	No	2	Yes
	National	31	RTContracting	20	7	3	11	Yeah ScienceBoy (if that's your REAL name). I mean sure, you can say that Gardasil is safe and effective, but how can we know for sure? Do you think that we should believe you just because your satement that Gardasil is safe and effective is agreed to by the following organizations??? World Health Organization The National Institues of Health UK Department of Health U.S. Department of Health and …	Positive	No	No	No	No	No		No
	National	31	Skyhawk_	34	23	9	16	garnet1245 wrote: "Nice try yourself Skyhawk. Merck did all of the tests and then submitted them to the FDA for rubber-stamp approval" -------------------------- Are you addressing my reply to NotHere's post? I have no idea what you're talking about considering I only pointed out that the poster in question wrote that the FDA report confirmed that the incidence of precancerous lesions rose by "ab…	Positive	No	No	No	No	No		Yes
	National	31	lspring	0	1	1	1	This comment and related replies have been removed by the moderator.	Neutral	No	No	No	No	No		No
	National	31	NotHere	8	16	6	8	skyhawk, please show me where I lied. I even put my quotation marks around what I copied and pasted from the report. That information was new to me so I guess I was a bit shocked. There is no evidence that in 20 years our children will not develop cancer or will not be infertile due to this vaccine. I was able to find more information here: http://articles.mercola.com/sites/articles/archive/2010/…	Negative	Yes	No	No	No	No		Yes
	National	31	Skyhawk_	29	14	10	16	NotHere wrote: "please show me where I lied. I even put my quotation marks around what I copied and pasted from the report. That information was new to me so I guess I was a bit shocked." ------------------- You earlier wrote the following regarding the FDA report without quotes or attribution: "I am just reading a Gardasil background document and I am surprised I have not heard this earlier: If …	Positive	Yes	No	No	No	No		Yes
http://www.cbc.ca/whitecoat/blog/accountability/2011/06/15/getting-past-vaccine-scepticism/	National	32	KatiDebelic	43	85	1	2	Yes, there are people skeptical to vaccnation. these are the mothers and fathers who haveseen their children regress after gettng their shots, and developing seizures, and autism spectrum disorders. There are adults who have contracted MECFS after being forced to get Hep B vaccinatons as a mandatory job requirement (health care). Those are 2examples amongst many. Tthe medical establishment does n…	Negative	No	No	No	No	No	1	No
	National	32	Jezebel2011	18	50	1	1	Inform yourselves before you subject your children to vaccines. http://www.youtube.com/watch?v=j-U9YRpL348	Negative	Yes	No	No	No	No		No
	National	32	tony bateson	32	68	1	1	There are millions of vaccine skeptics and it is because they read the body language of vaccination whilst the majority do not. For example where are the unvaccinated autistic people - 15 years intensive study on my part hasn't found them. Also why do the residents of Washington DC and parts of London close to the UK seat of government not vaccinate their kids? Now add to that the collective inte…	Negative	No	No	No	No	No	1	No
	National	32	Opinion234	29	39	3	19	A great number of childhood vaccines may present no obvious problems for one child; for another there may be serious consequences. I'm not against "all" childhood vaccines, but we have to start looking at people as individuals (immune-suppressed or immune-reactive); one size does not fit all and we don't all have compromised immune systems. People are genetically predisposed to being 1) immune su…	Negative	No	No	No	No	No	1	No
	National	32	Kateness	88	49	1	1	I am pregnant with my first child who, until he or she is old enough to be vaccinated, cannot protect him or herself from the viruses being carried by people who refuse vaccination. Those of you who aren't vaccinated and who won't vaccinate your kids put my child at risk. All because of one study, which has now been definitively debunked. How ignorant. And selfish.	Positive	No	No	No	No	No	3	Yes
	National	32	Opinion234	25	33	4	19	When it comes to vaccine be informed. Know each individual vaccine and the disease it is correlated with. Know your individual child's risk factor both for getting the disease (and/or actually being harmed by it) and the likelihood of adverse effects due to over-vaccination. Know how natural, life-long immunity is built in the body, and how it benefits an individual over his/her lifetime. Underst…	Negative	No	No	No	No	No		No
	National	32	Denise Brady	20	29	1	1	Opinion 234 wrote:When it comes to vaccine be informed. Know each individual vaccine and the disease it is correlated with. Know your individual child's risk factor both for getting the disease (and/or actually being harmed by it) and the likelihood of adverse effects due to over-vaccination. Know how natural, life-long immunity is built in the body, and how it benefits an individual over his/her…	Negative	No	No	No	No	No		No
	National	32	KatiDebelic	13	20	2	2	Here is a comment frm a patient with ME/CFS on a blog post from Mindy Kitei at www.cfscentral.com "I think that even if the XMRV occurred in a lab setting it is still a retrovirus and quite possibly got into the vaccine supply. I am 99.9% certain that is the source of my disease. 20 coworkers were given Heb B vaccine. All of us became ill and no one has recovered. M Bloomer" XMRV is a new retrovi…	Negative	Yes	No	Yes	No	No		No
	National	32	acrolein	8	61	4	6	I feel there is every reason to be skeptical when it comes to vaccines. The reason is many of the pathogenic viruses are not really viruses at all they are toxic reactive chemical compounds which can probably cause mutations to viruses and to bacteria. When toxic chemicals can cause mutations to e-coli bacteria does that not mean that vaccines have to be up dated in order for the immune system to…	Negative	No	No	No	No	No	1	No
	National	32	bondgirl77	28	3	1	1	The WHO supports breastfeeding. See http://www.who.int/mediacentre/news/statements/2011/breastfeeding_20110115/en/ Name your sources, be certain they are from reputable academic publications, haven't been retracted and have the highest level of evidence possible ( see mcmaster's evidence pyramid ), please.	Positive	Yes	No	No	No	No		No
	National	32	maurinemeleck	25	59	1	1	How about presenting both sides of the story? The reason so many people are worried about the safety of vaccines in not due to Dr. Wakefield, but to the fact that tens of thousands of parents saw their normally progressing children regress following vaccinations and then become autistic. We still need that fully vaccinated vs fully unvaccinated independent study of children that has never been do…	Negative	Yes	No	No	No	No		No
	National	32	Opinion234	37	25	5	19	All pharmaceutical products, including vaccines, carry a risk of harm. Just as individuals can react differently to prescription drugs, some people are at greater risk than others for adverse responses to vaccination that can lead to chronic illness and disability, or even death. We are not all the same and are all subject to different illness and medical conditions. The truth is vaccines have si…	Negative	No	No	No	No	No	1	No
	National	32	scarytruth	18	46	1	2	wow this guys another front man for big farma...your lies are falling on educated ears who no longer buy the BS...people need to look for answer's any where but the main stream media for the truth and thats been proven time and time again	Negative	No	No	No	No	No		No
	National	32	emichaud1968	13	14	1	1	The interesting part about vaccinations is that there are requirements from either the provincial or municipal health authorities to enforce vaccination for kids. My sons, who are 15, missed their DPT booster due date by a few days. I got quite the nasty letter from Ottawa health indicating that unless I tell them exactly why I did not vaccinate my children, they will be sent home from school. I …	Mixed	No	No	No	No	No	3	Yes
	National	32	acrolein	5	47	5	6	Its my belief that retro Viruses are created by pharmaceuticals although maybe not intentionally. As in the case of prostrate cancer viruses I would question explicitly the involvement of pharmaceuticals in the pathology of this disease. When chemotherapy drugs can cause hemorrhagic cystitis there is no reason to believe that other medications using the same molecules as chemo drugs can not cause…	Negative	No	No	No	No	No	1	No
	National	32	Stay tuned	23	22	6	8	I've noticed that many people who object to vaccines for children are quite keen to be the recipients of other forms of medication for themselves, all of which cause side effects of some kind - why is that? You same folks are probably the type who use toxic finger nail polish remover, subject yourselves to hair chemicals and various toxic chemicals for household, vehicle and farm use.	Positive	No	No	No	No	No	2	No
	National	32	David84	33	14	1	2	If you think that vaccines are a scam what is your explanation for the outbreaks in communites where vaccination rates have declined? As far as MMR causing autism goes here is a study that looks into that: http://www.ncbi.nlm.nih.gov/pubmed/12421889	Positive	Yes	No	No	No	No		No
	National	32	Opinion234	15	33	6	19	This Brady Bunch episode demonstrates that back in the late sixties, early seventies, the measles was once not the feared virus, that they make it out to be today. http://www.blinkx.com/watch-video/the-brady-bunch-is-there-a-doctor-in-the-house/Vw7AJKy5XO3MhdzsNbPFqQ	Negative	Yes	No	No	No	No		No
	National	32	Stay tuned	11	20	7	8	This article mentions vaccines against human papillomavirus (HPV), but it doesn't explain that therapeutic HPV vaccines are under development - which hold the promise of eliminating tunours associated with HPV infections. Unfortunately, that work is not well funded - you might want to ask your MPs and provincial politicians why that isn't happening?	Positive	No	No	No	No	No		No
	National	32	lisa321	48	28	1	1	To those parents who choose not to vaccinate: May your beliefs give you comfort in your old age when you have no grandchildren due to the mumps that your child 'recovered' from.	Positive	No	No	No	No	No		No
	National	32	applgrl	63	26	1	1	There is something called Scientific Method. Someone has a hypothesis. They undergo a research project to prove the hypothesis. The study must have a control group and a test group. The researchers must be "blind" so that they do not know which group is which. The test results are published and reviewed by others with expertise. Often the study will be repeated to ensure it is valid. After the hy…	Positive	No	No	No	No	No		No
	National	32	Opinion234	26	42	7	19	A common argument perpetrated by pro-vaccine advocates is that parents don't vaccinate because they don't know anything, they are under-educated and misinformed. However, the opposite is true. The parents who have chosen to research the issue and read both sides of the argument in depth, often decide not to vaccinate, or to choose only some vaccines and not others, or decide not to keep vaccinati…	Negative	No	No	No	No	No	1	No
	National	32	RTContracting	59	28	4	11	maurinemeleck wrote: How about presenting both sides of the story? ================================ Because one "side" gets their information from organizations like the WHO, Health Canada, the CDC, the Canadian Medical Association, the American Medical Association, the Canadian Paediatric Society, the American Academy of Pediatrics, and every other major medical association on the planet. The ot…	Positive	No	No	No	No	No		No
	National	32	Arctic Dude	34	28	4	4	I find that the people who are anti-vaccine are also the same ones who deny the moon landing or think that waving a crystal over a broken arm will heal it. Also they are those who are anti-science or Creationist types. I can't understand their mind-set.	Positive	No	No	No	No	No		No
	National	32	Opinion234	21	32	8	19	Vaccine promoters are always trying to belittle those who don't share all of their pro-vaccine views. They love to interpret something in a manner in which it was not intended to be understood, often deliberately. How many times can pro-vaccinators bring up Jenny McCarthy, moon- landings and such? Do you think this stratagem of putting people down works to accomplish anything? Yes, we know, we've…	Negative	No	No	No	No	No		No
	National	32	gurn22	22	18	1	1	I don't have a problem with routine childhood immunizations.....I think that people who don't immunize their children are being negligent. I do have an issue, however, with the growing pressure that we are feeling to immunize ourselves and our children, year after year, for influenza. There are other vaccines, like Hepatitis B, that are also being pushed and I wonder really how necessary these ar…	Negative	No	No	No	No	No	1	Yes
	National	32	Ron Alberta	41	13	1	1	The thinking about vaccines has changed, and not for the good. In times past the large majority of the population were thankful for newly developed vaccines that produced obvious benefits. And to a large degree they appreciated that while they did not really understand how they worked, it was obvious they did, and trust was given to the scientists who developed them, and the doctors that recommen…	Positive	No	No	No	No	No	2	No
	National	32	jen_yen	16	8	1	1	Grouping everyone who doesn't see the necessity of universal vaccination for a whole host of diseases as having "misguided skepticism" certainly doesn't help Dr.Larson's cause of developing trust Dr. Goldman. I think public skepticism is a good thing, and we should never erode our ability to say 'no', or to ask 'why?'. The article points to public trust being eroded when two or more public health…	Mixed	No	No	No	No	No	3	Yes
	National	32	RTContracting	18	12	5	11	Opinion234 wrote: This Brady Bunch episode demonstrates that back in the late sixties, early seventies, the measles was once not the feared virus, that they make it out to be today. http://www.blinkx.com/watch-video/the-brady-bunch-is-there-a-doctor-in-the-house/Vw7AJKy5XO3MhdzsNbPFqQ =============================== In the 1920's the Canadian Government made up a list of a couple dozen or so "Not…	Positive	Yes	No	Yes	No	No		No
	National	32	LunaFCS	18	37	1	1	Vaccines stimulate the immune system. This is fact. If one is immuno-compromised, or one's immune system is underdeveloped or over-stimulated, vaccines can and will wreak havoc on their body. This is also fact. There is no debate about this. It's as true as water is wet. So, in the vast majority of people, vaccines will not hurt them. They should work as intended. They are excellent for the vast …	Negative	No	No	Yes	No	No	1	Yes
	National	32	Green in AB	26	43	1	1	I don't object to vaccines per se, but I do object strongly to all the garbage they put in with them. Take out the aluminum, mercury, latex, formaldehyde, synthetic adjuvants and other crap (which means you might - GASP! - have to refrigerate them! If only health clinics had fridges!) and allow people access to individual vaccines instead of combination ones (dTap, MMR, etc) to spread out the exp…	Negative	No	No	No	No	No	1	Yes
	National	32	Thanks4Playing	20	73	17	20	Getting Past Vaccine Skepticism --- Are you Serious ??? Your pimping for big pharma now? So, what vacation spot did you select....? Just askin. The population would not be a bunch of chronic sick people, from cradle to grave , if we did away with ALL vaccines. The stuff is basically a witches brew of toxic waste.... Vaccines are Poison.....Do NOT take Any, ever again !!!	Negative	No	No	No	No	No		No
	National	32	Opinion234	14	19	9	19	Here's one of the reasons we remain skeptical about the benefit and risks of all vaccinations. Flu vaccine propaganda has been in the works for a long time, that is how to promote flu vaccines for healthy people who don't really need them. The CDC's Seven Step Recipe for Generating Interest in, and Demand for, Flu (or any other) Vaccination http://www.ama-assn.org/ama1/pub/upload/mm/36/2004_flu_n…	Negative	Yes	No	No	No	No	1	No
	National	32	RTContracting	46	15	6	11	Green in AB wrote: I would gladly vaccinate my kids for pertussis early on since it's a legitimate threat to infants in Canada. Diptheria, not so much. =================== Diphtheria isn't currently a threat in Canada BECAUSE OF THE VACCINE. If people start refusing the vaccine, then kids will start dying of diphtheria - just like what is happening with pertussis. Diphtheria can kill up to 1 in 5…	Positive	Yes	No	No	No	No		No
	National	32	caringstd66	N/A	N/A	1	1	This comment has been removed by the moderator.	Neutral	No	No	No	No	No		No
	National	32	InnateChoice	13	33	1	1	I do truly believe this researchers, doctors, big pharma, whoever you wish to credit these ideas do honestly and sincerely think they are trying to be helpful. But just because they are sincere, doesn't mean that it is what is needed or what is right. Please do the research, even their own medical research does not provided the evidence to support all the vaccines they believe we should be sticki…	Negative	No	No	No	No	No	1	No
	National	32	Christopher Rath	24	13	1	1	Step 1 in a campaign to ensure proper uptake of vaccines is to make science mandatory all the way through high school. Canadians who do not have at least high school science don’t have sufficient education to properly understand the background information provided for vaccines.	Positive	No	No	No	No	No	2	No
	National	32	Peter@Dragons	15	33	2	2	I don't trust big pharma anymore, especially after it was revealed that they used fetal tissue for vaccines that are blamed for the spike in brain tumors. Keeping my sleeves rolled down for protection.	Negative	No	No	No	No	No		No
	National	32	Thanks4Playing	11	28	18	20	This keeps popping up. Say NO To The Needle.....and the damage done !	Negative	No	No	No	No	No		No
	National	32	Thanks4Playing	7	31	19	20	@ ChristopherRath "make science mandatory all the way through high school" --- So, what your saying is Brainwash people to believe this tripe? School.....is Not a learning institution but an indoctrination center. People are NOT taught How to use their minds and think Independently. No Sir, that is reserved for the private schools of the Elite. School is based on "Repeat After Me" and then the cu…	Negative	No	No	No	No	No		No
	National	32	David84	19	7	2	2	InnateChoice, in response to your rhetorical question, the reason our species survived for thousands of years without vaccines was largely because we had higher birthrates to counteract the high rate of infant/child mortality. Vaccination has become one of the effective ways to reduce this. Certainly, we can survive as a species without vaccines but at a high cost to individuals.	Positive	No	No	No	No	No	2	No
	National	32	Opinion234	3	7	10	19	Read from the parents perspective, children adverse reactions following vaccinations. http://followingvaccinations.com/	Negative	Yes	No	No	No	No		No
http://www.cbc.ca/news/canada/story/2012/01/25/hpv-vaccine-males-gardasil.html	National	33	TimBitzzz	33	81	2	13	ooooooooooooo use the C word to drum up the fear level eh Dr Dolittle. Just saying teens are having unprotected sex is not enough in 2012.	Negative	No	No	No	No	No		No
	National	33	ginvunot	8	1	1	1	Geez what an informed comment! HPVs are implicated in a number of cancers and vaccination seems like a reasonable step. Try taking the time to google hpv and cancer and educate yourself.	Positive	No	No	No	No	No		No
	National	33	ripperjack	215	32	1	7	If they offer it free to females dont they have to offer it free to both genders? Or is some gender discrimination allowed?	Neutral	No	No	No	No	No		Yes
	National	33	HolyMacinaw	38	17	1	2	Some is perfectly acceptable it would appear.	Neutral	No	No	No	No	No		No
	National	33	Martinet	49	18	1	3	Not acceptable in one direction but in the other it is perfectly accepted and practiced. Equal rights only apply to women in these issues. Breast cancer is screened for free. postate cancer is at a cost to the male. Funding for womens diseases is ten fold what it is for men. If the case was opposite the female lawyers would be in the Supreme Court till it changed.	Positive	No	No	No	No	No		No
	National	33	Katetbay	38	4	1	7	Yes. For the vaccine to work it MUST be offered free to both genders. I don't know if you heard this or not but the young people in Canada are broke.	Positive	No	Yes	No	No	No		No
	National	33	HolyMacinaw	5	93	2	2	Get a job then, and don't quit it to go protest no jobs.	Neutral	No	No	No	No	No		No
	National	33	Keylimepie	37	60	1	1	Really? HPV causes cervical cancer in tons of women, but you're going to turn this into a "poor me, the feminists are always after me" issue? Do you realize that when you constantly make it sound like your life is so hard done by by women gaining some status in the world, you only fuel the fire?	Positive	No	No	No	No	No		No
	National	33	ripperjack	49	0	2	7	HolyMacinaw...i have a job...i am 50 and have had a job since i was 18	Neutral	No	No	No	No	No		Yes
	National	33	The Big BK	52	31	1	2	Welcome to Canada ripperjack! Gender discrimination is pretty much "Policy" in Canada. Men who don't pay child support are tracked and eventually jailed if they don't pay up. Women who pull the same trick have no one tracking or jailing them. They're free to do as they please. For federal child tax credits, if the man and woman live together, then only the woman can apply. Even if she is not a ci…	Neutral	No	No	No	No	No		No
	National	33	jules17	35	10	1	1	It isn't free for females either. I had the vaccinations done about 4 years ago as a university student and had to pay out of pocket since even my medical coverage wouldn't pick up the full tab.	Positive	No	No	No	No	No		No
	National	33	mick314	19	5	1	4	It is free for women/girls who meet the age criteria.	Positive	No	No	No	No	No		No
	National	33	ry2010	5	21	1	2	The Big BK - Why don't you ask for a breast exam to go along with your HPV vaccine? Just so you don't feel discriminated against. BTW - there aren't shelters for men, because in almost all cases of domestic violence, it is the man that is the perpetrator of the violence. Even in cases where the woman is being violent, the man usually isn't afraid of being murdered. Women face a much more dangerou…	Positive	No	No	No	No	No		No
	National	33	ncrnewsinterest	9	5	1	3	Wow, Keylimepie and ry2010 are so deep into their one sided approach to equality that they fail to see the benefits for women of offering the vaccine to males at the same price or under the same plan as they do for females.	Positive	No	No	No	No	No		No
	National	33	The Big BK	1	1	2	2	@ncrnewsinterest Thanks for that. I would have defended myself, but I'm too busy whining about how men are getting shafted. Besides, I find that the more I use logic when dealing with equality, the more hysteric the feminists get. I like that you mentio	Neutral	No	No	No	No	No	4	No
	National	33	ry2010	0	0	2	2	Did I say it shouldn't be offerred free for men?	Positive	No	No	No	No	No		No
	National	33	beammeupscotty	30	140	1	1	So get a shot and sleep around!!!	Negative	No	No	No	No	No		No
	National	33	Martinet	24	5	2	3	Yeah. And you get a polio vaccination and then go expose yourself to it.	Positive	No	No	No	No	No		No
	National	33	ode2B17	78	79	1	1	Mmmmmmmm toxic side-effects... not just for breakfast anymore.	Negative	No	No	No	No	No		No
	National	33	PEMCAT	16	21	2	2	Bee Ess! What a stupid comment!	Positive	No	No	No	No	No		No
	National	33	EdwinHodge	184	89	1	3	I think this is a good recommendation. If men play a role in the transmission of HPV, and if there is sufficient evidence to state that the vaccine helps prevent men from spreading it, and if the vaccine has the knock-on effect of protecting men from other forms of cancer, then being vaccinated can only be a good thing - unless you're one of those people who feels that increased cancer risk is a …	Positive	No	No	No	No	No		No
	National	33	TimBitzzz	35	85	3	13	Have you ever heard of the words "side effects"? Or maybe the phrase "class action law suit"? ...but dont let my opinion stop you....get your kids done asap...and we'll see how it turns out.	Negative	No	No	No	No	No		No
	National	33	cmm740	44	55	1	4	Many individuals, including myself, who do not believe that people should be getting this vaccine are not those who think "increased cancer risk is a suitable punishment for the 'sin' of having sex." What a ridiculous insinuation. The point is that there is not sufficient evidence for this vaccine. The fact is that there have been no long-term studies done as to the potential side effects, 10 or …	Negative	No	Yes	No	No	No	1	No
	National	33	Random Person	65	31	1	18	Looks like the anti-vaccine folks are trolling again. The NACI, which is comprised of experts, has advised it. I'm going to go with what the people that know what they're talking about think. When people choose not to vaccinate, they reduce the immunity of the general population. Their opinions are based on quack science (ask Jenny McCarthy, who after her public campaign against vaccines has sinc…	Positive	No	No	No	No	No	2	No
	National	33	Tyrannorabbit	35	4	2	2	Random Person, I wish I could say Ms. McCarthy has educated herself in any way but she was still defending Wakefield as of last January.	Positive	No	No	No	No	No		No
	National	33	Katetbay	14	14	2	7	Love the use "IF" men play a role in spreading a STD. I'd like to see the plan to stop them from playing that role!	Positive	No	Yes	No	No	No		No
	National	33	EdwinHodge	15	8	2	3	...but dont let my opinion stop you....get your kids done asap...and we'll see how it turns out. It's certainly telling about your personality that you take some sort of satisfaction from contemplating the idea of children becoming sick. Anything to make your point, I suppose. "I happen to work in the medical research industry myself, so feel I am speaking from a rather knowledgeable background. …	Positive	No	No	No	No	No		No
	National	33	Georooney	181	123	1	1	Another pharmceutical company strikes gold, with the help of government.	Negative	No	No	No	No	No		No
	National	33	Katetbay	29	18	3	7	How did Canada play a role in that whole polio thing? Who got rich off of that plan?	Positive	No	Yes	No	No	No		No
	National	33	smartmetersick	76	78	1	1	HPV vaccine - for girls, for boys - do the research. The federal panel is kowtowing to the pharmaceutical industry. Remember that Gov. Rick Perry had to answer for making these vaccinations of young girls in Texas mandatory. Parents in Texas raised a huge stink. He had to back down. I The vaccine has nothing to do, folks, with unprotected sex. Canadians are being bushwacked again, simply because …	Negative	No	No	No	No	No		No
	National	33	Strangequark	27	15	1	9	Are you trying to tell us that somehow Average Joe Texan knows more about vaccine research and epidemiology than the folks who study the stuff and generate policy recommendations here in Canada? Cause it really sounds like that's what you're trying to claim. Truth is not democratic. You don't get to vote on what's a fact and what isn't.	Positive	No	No	No	No	No	2	No
	National	33	selenius	115	73	2	6	from the outset it was very clear that MEN were the major source of the spread of HPV. The problem was that women have a much more serious problem with HPV (risk of cancer) than men. The last stats I heard was that 50% of men have the virus on them. That puts women at a serious risk to contract. And as usual, the onus was put on women to address the issue. Best to have everyone vaccinated and rid…	Positive	No	No	No	No	No		No
	National	33	TimBitzzz	45	22	4	13	reveal your sources rather tired of "stats I heard"	Negative	No	No	No	No	No		No
	National	33	Poeisapoet	31	10	1	1	It takes two to tango. Men can't be entirely to blame. But yes, universally available vaccination is probably the way to go.	Positive	No	No	No	No	No		No
	National	33	int.temp	18	31	1	1	well, 'I heard' the numbers are much higher... ' heard' that from the doctor telling me I had to go through a fantastic 'cone biopsy' of my cervix. Here's the reality. it is not unheard of that the people recommending the use of drugs in this country and especially in the united states are also on a board or have stocks in or are in some way profiting from the sale. (I'm not providing stats or li…	Negative	No	No	Yes	No	No	1	No
	National	33	ncrnewsinterest	2	1	2	3	I love this approach. Men are responsible for the transmission of the disease, but women bare the "burden" of addressing the issue by receiving a vaccine paid for by the public. Meanwhile, males continue to be exposed. Totally sexist, yet classically Canadian. One question, how do heterosexual men get the disease, toilet seats? Why can't we leave gender politics out of it and just support equal a…	Positive	No	No	No	No	No		No
	National	33	ljhnsn61	68	50	2	2	economic stimulus for the manufacture of this vaccine.	Negative	No	No	No	No	No		No
	National	33	Required Fields	22	19	3	19	Of course vaccines are good for the economy - it's cheaper to vaccinate than to treat cervical cancer. "An ounce of prevention is worth a pound of cure" is true for vaccines, and is why governments and the health care system like them.	Positive	No	No	No	No	No		No
	National	33	TimBitzzz	16	10	5	13	@Required Truisms are nice but this is not 1955 and heroes like Jonas Salk who created the polio vaccine not for financial gain but to better humanity. Sadly in 2012 big pharma doesnt have bettering humanity on their radar.	Negative	No	No	No	No	No		No
	National	33	v0ci3cau3a	90	55	1	3	Please tell us about the side effects of the children of those having received this vaccination. Any trials on that? And how many years have you followed those who received the vaccination in the trials? How extensive were these trials? Because, after all, we're messing with our children's reproductive health with this vaccination. Remember the Dalcon Shield? Yazmin? NUVARING? Diethylstilbestrol …	Negative	No	No	No	No	No		No
	National	33	spunky	51	17	1	1	I wish I would have had the option of taking this drug when I was younger. I'm sure the side effects would have been minor compared to the cervical cancer I had.	Positive	No	No	Yes	No	No	2	No
	National	33	v0ci3cau3a	31	36	2	3	Spunky, we still have no idea what effects this will have on an entire general of young women. Careful what you wish for.	Negative	No	No	No	No	No		No
	National	33	Strangequark	29	25	2	9	Answers to this are easy to find and plentiful. But obviously you're not interested in the facts of the matter, you're only interested in spewing distrust.	Positive	No	No	No	No	No		No
	National	33	v0ci3cau3a	26	31	3	3	Strangequark, please direct me to the information regarding the possible 2nd generation health effects of this vaccination. Oh, wait, there is no such thing.	Negative	No	No	No	No	No		No
	National	33	Strangequark	22	12	3	9	This vaccine is not the revolutionary nor so different from others. We've had vaccines for a long time.	Positive	No	No	No	No	No		No
	National	33	Required Fields	21	8	4	19	Vaccines have been in use for over 100 years. We know the risks. This isn't some kind of mysterious new medical intervention.	Positive	No	No	No	No	No	2	No
	National	33	Katetbay	34	14	4	7	To further "stir the Health Funding" pot ... The young people themselves may the solution. Legalize pot ... and you'll have all the health care funds you want to vaccinate both genders.	Positive	No	Yes	No	No	No		No
	National	33	JaniceRobinson	7	18	1	3	This comment and related replies have been removed by the moderator.	Neutral	No	No	No	No	No		No
	National	33	Sanity_check	96	52	4	4	Translation: the shareholders had a meeting and decided they could double their sales if they convinvced public health authorities that boys should also receive the vaccination. Notice how drug companies now lobby the governments & health authorities when making their product sales pitch - where they once ran ads targeting individuals. Much bigger payday if you get the public system to pay.	Negative	No	No	No	No	No		No
	National	33	Required Fields	8	8	5	19	If it curbs the spread of disease and leads to fewer cases of cancer, the pharmaceutical companies deserve some money for it.	Positive	No	No	No	No	No		No
	National	33	Natalie89	29	21	1	1	ripperjack, If I remember correctly, it was given for free to Grade 8 girls in the GTA, and I believe it was given freely before it was approved for boys/men. Maybe they'll offer it for free to boys in that grade too. If there is enough evidence supporting that it does not have negative impacts on children, then I think it should be given much earlier than the eight grade. Afterall, it would make…	Positive	No	No	No	No	No		No
	National	33	bjzeus	13	6	1	1	Natalie89...."given free" that doesn't mean the pharma doesn't profit. The individual didn't pay but the 'health system' did. Money collected from taxpayers.	Negative	No	No	No	No	No		No
	National	33	toddevans	52	26	1	5	are the pharmacutical companies becoming profiteers? they always prosper in times of economic hardships..thanks to the government in cohoots with media to stir up fear...people are so gullible..not me though..	Negative	No	No	No	No	No		No
	National	33	Random Person	8	2	2	18	BECOMING profiteers? Hahahaha! Big pharma always makes money... their business is keeping people healthy and alive, so when they make something that works, they can extort as much as they want. They should get credit for their discovery, of course, but these same discoveries could be made just as well by a funded public system, without the huge cost overruns dictated by private-sector profiteerin…	Positive	No	No	No	No	No		No
	National	33	Cowpants	55	32	1	2	I have doubts that this is best for people. Not too sure, but this sounds more like a sure win for Gardasil than a sure and safe public health policy.	Negative	No	No	No	No	No		No
	National	33	Random Person	8	6	3	18	Not too sure, but this sounds more like a sure win for Gardasil than a sure and safe public health policy. Experts reviewed it and determined that the benefits outweighed the risks... seems like sound health policy. Nothing is ever a sure thing, but this vaccine is effective against a life-threatening cancer. You can either get it and risk scary unknown side effects that people who know nothing a…	Positive	No	No	No	No	No	2	No
[truncated: 1,718 more rows]
